# Supplementary material for: Rhodium-catalyzed C–H α-fluoroalkenylation/annulation of β-ketosulfoxonium ylides with 2,2-difluorovinyl tosylate/oxadiazolones
Source: Royal Society of Chemistry journal article supplement (doi:10.1039/d4cc05621c), 2024-01-01
Supplement: d4cc05621c1.pdf [file d4cc05621c1.pdf]

# Rhodium-Catalyzed C–H $\alpha$ -Fluoroalkenylation/annulation of $\beta$ -ketosulfoxonium Ylides with 2,2-Difluorovinyl Tosylate/Oxadiazolones

Jia-Lin Song,<sup>a,b</sup> Zi-Feng Yang,<sup>c</sup> Sheng Fang,<sup>a</sup> Wang-Liang Chen,<sup>a</sup> Lian-Bao Ye<sup>\*a</sup>,  
Xiang Liu,<sup>\*c</sup> and Bing Shu<sup>\*a, d</sup>

<sup>a</sup>School of Pharmacy, Guangdong Pharmaceutical University, Guangzhou, 510006, P. R. China, E-mail: yelianbao@gdpu.edu.cn; shubing@gdpu.edu.cn.

<sup>b</sup>School of Chemistry, Sun Yat-sen University, Guangzhou, 510006, P. R. China.

<sup>c</sup>School of Chemistry and Chemical Engineering, Guangdong Pharmaceutical University, Zhongshan, 528458, P. R. China. E-mail: liux96@gdpu.edu.cn

<sup>d</sup>Guangdong Provincial Key Laboratory for Research and Evaluation of Pharmaceutical Preparations, Guangdong Pharmaceutical University, Guangzhou, 510006, P. R. China.

## Supporting Information

### Table of content

|     |                                                      |    |
|-----|------------------------------------------------------|----|
| 1.  | General information.....                             | 2  |
| 2.  | Preparation of starting materials.....               | 3  |
| 3.  | Optimization of Reaction Conditions.....             | 4  |
| 4.  | General procedure of products.....                   | 4  |
| 5.  | Characterization of products.....                    | 6  |
| 6.  | Gram-scale experiment.....                           | 18 |
| 7.  | Synthetic application of the product <b>3a</b> ..... | 19 |
| 8.  | Mechanistic studies.....                             | 21 |
| 9.  | Scheme S1 Mechanistic Proposal of <b>3a</b> .....    | 24 |
| 10. | Scheme S2 Mechanistic Proposal of <b>5a</b> .....    | 25 |
| 11. | X-Ray crystal data for compound <b>5g</b> .....      | 25 |
| 12. | NMR Spectra for New Compounds.....                   | 31 |
| 13. | References.....                                      | 72 |

## 1. General information

Unless otherwise noted, all reactions were carried out at room temperature under an atmosphere of nitrogen with flame-dried glassware. If reaction was not conducted at room temperature, reaction temperatures are reported as the temperature of the bath surrounding the vessel unless otherwise stated. The dry solvents used were purified by distillation over the drying agents indicated in parentheses and were transferred under nitrogen: 1,2-dichloroethane (CaH<sub>2</sub>), Anhydrous 1,1,1,3,3,3-hexafluoroisopropanol (HFIP), 1,4-dioxane, DMF and MeOH were purchased from Acros Organics and stored under nitrogen atmosphere. Commercially available chemicals were obtained from commercial suppliers and used without further purification unless otherwise stated.

Proton NMR (<sup>1</sup>H) were recorded at 400 MHz, and Carbon NMR (<sup>13</sup>C) at 101 MHz NMR spectrometer unless otherwise stated. The following abbreviations are used for the multiplicities: s: singlet, d: doublet, t: triplet, q: quartet, m: multiplet, br s: broad singlet for proton spectra. Coupling constants (*J*) are reported in Hertz (Hz).

High-resolution mass spectra HRMS-ESI (Quadrupole) were recorded on a BRUKER VPEXII spectrometer with EI and ESI mode unless otherwise stated.

Analytical thin layer chromatography was performed on Polygram SIL G/UV<sub>254</sub> plates. Visualization was accomplished with short wave UV light, or KMnO<sub>4</sub> staining solutions followed by heating. Flash column chromatography was performed using silica gel (200-300 mesh) with solvents distilled prior to use.

No attempts were made to optimize yields for substrate synthesis.

## 2. Preparation of starting materials

The substrates of  $\beta$ -ketosulfoxonium ylides **1**, fluorovinyls **2**, and oxadiazolones **4** were prepared according to the previous procedure<sup>1-6</sup>. All the characteristic data are consistent with the data reported before.

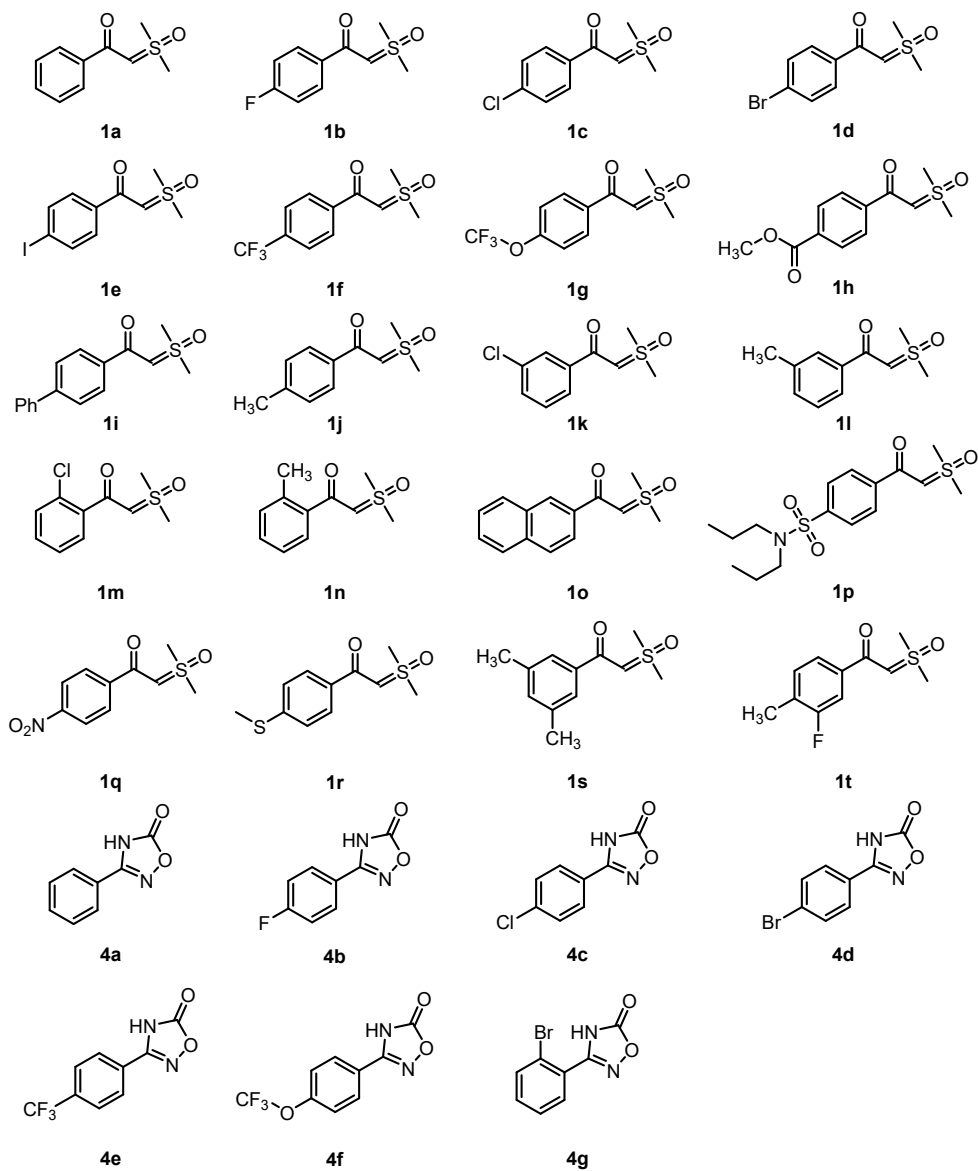

### 3. Optimization of Reaction Conditions

**Table S1** Optimization of Reaction Conditions of **3a**

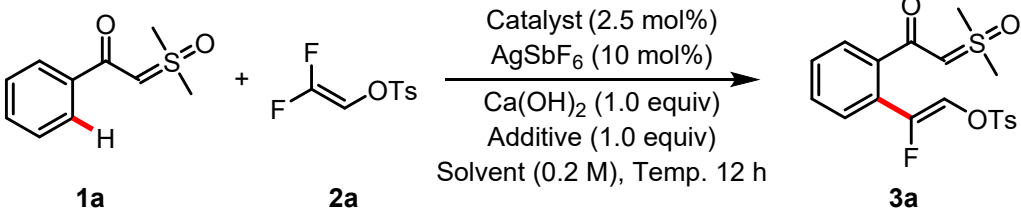

| Entry                 | Catalyst                                 | Additive                        | Solvent                              | Temp. (°C) | Yield <sup>b</sup> |
|-----------------------|------------------------------------------|---------------------------------|--------------------------------------|------------|--------------------|
| 1                     | [Cp*RhCl <sub>2</sub> ] <sub>2</sub>     | -                               | HFIP                                 | 60         | 20%                |
| 2                     | [Cp*IrCl <sub>2</sub> ] <sub>2</sub>     | -                               | HFIP                                 | 60         | ND <sup>c</sup>    |
| 3 <sup>d</sup>        | [Ru(p-cym)Cl <sub>2</sub> ] <sub>2</sub> | -                               | HFIP                                 | 60         | ND                 |
| 4                     | [Cp*RhCl <sub>2</sub> ] <sub>2</sub>     | B(OH) <sub>3</sub>              | HFIP                                 | 60         | 43%                |
| 5                     | [Cp*RhCl <sub>2</sub> ] <sub>2</sub>     | HOAc                            | HFIP                                 | 60         | 35%                |
| 6                     | [Cp*RhCl <sub>2</sub> ] <sub>2</sub>     | K <sub>2</sub> CO <sub>3</sub>  | HFIP                                 | 60         | 41%                |
| 7                     | [Cp*RhCl <sub>2</sub> ] <sub>2</sub>     | CsOPiv                          | HFIP                                 | 60         | 33%                |
| 8                     | [Cp*RhCl <sub>2</sub> ] <sub>2</sub>     | Cs <sub>2</sub> CO <sub>3</sub> | HFIP                                 | 60         | 27%                |
| 9                     | [Cp*RhCl <sub>2</sub> ] <sub>2</sub>     | KOAc                            | HFIP                                 | 60         | 70%                |
| 10                    | [Cp*RhCl <sub>2</sub> ] <sub>2</sub>     | KOAc                            | DCE                                  | 60         | 62%                |
| 11                    | [Cp*RhCl <sub>2</sub> ] <sub>2</sub>     | KOAc                            | DMF                                  | 60         | trace              |
| 12                    | [Cp*RhCl <sub>2</sub> ] <sub>2</sub>     | KOAc                            | MeOH                                 | 60         | trace              |
| 13                    | [Cp*RhCl <sub>2</sub> ] <sub>2</sub>     | KOAc                            | 1,4-dioxane                          | 60         | trace              |
| 14                    | [Cp*RhCl <sub>2</sub> ] <sub>2</sub>     | KOAc                            | H <sub>2</sub> O/HFIP (0.2 ml/0.8ml) | 60         | 37%                |
| 15                    | [Cp*RhCl <sub>2</sub> ] <sub>2</sub>     | KOAc                            | HFIP                                 | 70         | 78%                |
| <b>16<sup>e</sup></b> | <b>[Cp*RhCl<sub>2</sub>]<sub>2</sub></b> | <b>KOAc</b>                     | <b>HFIP</b>                          | <b>70</b>  | <b>90%</b>         |
| 17 <sup>f</sup>       | [Cp*RhCl <sub>2</sub> ] <sub>2</sub>     | KOAc                            | HFIP                                 | 70         | trace              |
| 18 <sup>g</sup>       | [Cp*RhCl <sub>2</sub> ] <sub>2</sub>     | KOAc                            | HFIP                                 | 70         | 15%                |
| 19 <sup>h</sup>       | [Cp*RhCl <sub>2</sub> ] <sub>2</sub>     | KOAc                            | HFIP                                 | 70         | 61%                |
| 20 <sup>i</sup>       | [Cp*RhCl <sub>2</sub> ] <sub>2</sub>     | KOAc                            | HFIP                                 | 70         | 43%                |
| 21 <sup>j</sup>       | [Cp*RhCl <sub>2</sub> ] <sub>2</sub>     | KOAc                            | HFIP                                 | 70         | trace              |
| 22 <sup>d</sup>       | [Cp*RhCl <sub>2</sub> ] <sub>2</sub>     | KOAc                            | HFIP                                 | 70         | 35%                |
| 23                    | -                                        | KOAc                            | HFIP                                 | 70         | ND                 |

<sup>a</sup>Reaction Conditions: **1a** (0.2 mmol), **2a** (0.3 mmol), catalyst (2.5 mol%), AgSbF<sub>6</sub> (10 mol%), Ca(OH)<sub>2</sub> (1.0 eq), additives (1.0 equiv), solvent (0.2 M), Temp., 12 h.

<sup>b</sup>Isolated yield.

<sup>c</sup>ND: Not detected.

<sup>d</sup>No AgSbF<sub>6</sub>.

<sup>e</sup>Ca(OH)<sub>2</sub> (1.5 eq).

<sup>f</sup>Under N<sub>2</sub> atmosphere.

<sup>g</sup>Under O<sub>2</sub> atmosphere.

<sup>h</sup>AgBF<sub>4</sub> instead of AgSbF<sub>6</sub>.

<sup>i</sup>Ag<sub>2</sub>CO<sub>3</sub> instead of AgSbF<sub>6</sub>.

<sup>j</sup>Cu(OAc)<sub>2</sub> instead of AgSbF<sub>6</sub>.

**Table S2** Optimization of Reaction Conditions of **5a**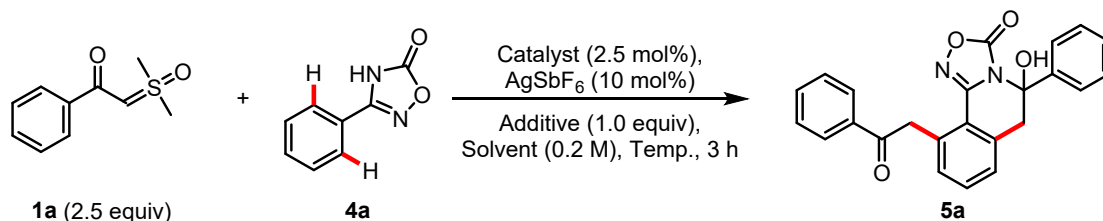

| Entry           | Catalyst                                        | Additive                        | Solvent    | Temp. (°C) | Yield <sup>b</sup> |
|-----------------|-------------------------------------------------|---------------------------------|------------|------------|--------------------|
| 1               | [Cp* <i>RhCl</i> <sub>2</sub> ] <sub>2</sub>    | —                               | DCE        | 100        | 33%                |
| 2               | [Cp* <i>IrCl</i> <sub>2</sub> ] <sub>2</sub>    | —                               | DCE        | 100        | ND <sup>c</sup>    |
| 3 <sup>d</sup>  | [Ru(p-cym)Cl <sub>2</sub> ] <sub>2</sub>        | —                               | DCE        | 100        | ND                 |
| 4               | [Cp* <i>RhCl</i> <sub>2</sub> ] <sub>2</sub>    | B(OH) <sub>3</sub>              | DCE        | 100        | 16%                |
| 5               | [Cp* <i>RhCl</i> <sub>2</sub> ] <sub>2</sub>    | PivOH                           | DCE        | 100        | 43%                |
| 6               | [Cp* <i>RhCl</i> <sub>2</sub> ] <sub>2</sub>    | HOAc                            | DCE        | 100        | 50%                |
| 7               | [Cp* <i>RhCl</i> <sub>2</sub> ] <sub>2</sub>    | KOAc                            | DCE        | 100        | 59%                |
| 8               | [Cp* <i>RhCl</i> <sub>2</sub> ] <sub>2</sub>    | NaOAc                           | DCE        | 100        | 76%                |
| 9               | [Cp* <i>RhCl</i> <sub>2</sub> ] <sub>2</sub>    | Na <sub>2</sub> CO <sub>3</sub> | DCE        | 100        | 9%                 |
| <b>10</b>       | <b>[Cp*<i>RhCl</i><sub>2</sub>]<sub>2</sub></b> | <b>NaOAc</b>                    | <b>DCM</b> | <b>100</b> | <b>88%</b>         |
| 11              | [Cp* <i>RhCl</i> <sub>2</sub> ] <sub>2</sub>    | NaOAc                           | HFIP       | 100        | trace              |
| 12              | [Cp* <i>RhCl</i> <sub>2</sub> ] <sub>2</sub>    | NaOAc                           | DMF        | 100        | trace              |
| 13              | [Cp* <i>RhCl</i> <sub>2</sub> ] <sub>2</sub>    | NaOAc                           | NMP        | 100        | trace              |
| 14              | [Cp* <i>RhCl</i> <sub>2</sub> ] <sub>2</sub>    | NaOAc                           | DCM        | 80         | 80%                |
| 15              | <b>[Cp*<i>RhCl</i><sub>2</sub>]<sub>2</sub></b> | NaOAc                           | DCM        | 120        | 72%                |
| 16              | -                                               | NaOAc                           | DCM        | 100        | ND                 |
| 17 <sup>d</sup> | [Cp* <i>RhCl</i> <sub>2</sub> ] <sub>2</sub>    | NaOAc                           | DCM        | 100        | 56%                |

<sup>a</sup>Reaction Conditions: **1a** (0.5 mmol, 2.5 equiv), **4a** (0.2 mmol), catalyst (2.5 mol%), AgSbF<sub>6</sub> (10 mol%), additive (1.0 equiv), solvent (0.2 M), Temp., 3 h. <sup>b</sup>Isolated yield.

<sup>c</sup>ND: Not detected. <sup>d</sup>No AgSbF<sub>6</sub>.

## 4. General procedure of products

### (1) General procedure A

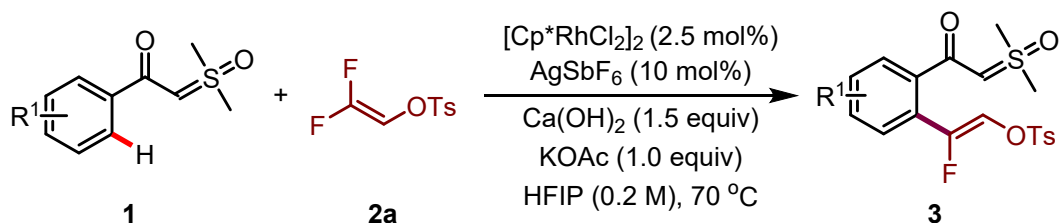

In an oven-dried Schlenk tube under air, a mixture of  $\beta$ -ketosulfoxonium ylides **1** (0.20 mmol, 1.0 equiv), 2,2-difluorovinyl tosylate **2a** (0.30 mmol, 1.5 equiv),  $[\text{Cp}^*\text{RhCl}_2]_2$  (3.1 mg, 0.0050 mmol, 2.5 mol%),  $\text{AgSbF}_6$  (6.9 mg, 0.020 mmol, 10 mol%),  $\text{Ca(OH)}_2$  (22.2 mg, 0.30 mmol, 1.5 equiv),  $\text{KOAc}$  (19.6 mg, 0.20 mmol, 1.0 equiv), and HFIP (1.0 mL, 0.20 M) was stirred at 70 °C for 4-12 h (heating mantle). Then the reaction mixture was purified by flash column chromatography on silica with an appropriate solvent to afford the pure product **3**.

## (2) General procedure B

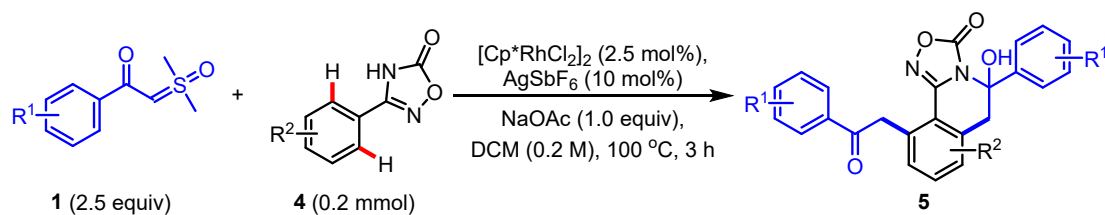

In an oven-dried Schlenk tube under air, a mixture of  $\beta$ -ketosulfoxonium ylides **1** (0.50 mmol, 2.5 equiv), oxadiazolones **4** (0.20 mmol, 1.0 equiv),  $[\text{Cp}^*\text{RhCl}_2]_2$  (3.1 mg, 0.0050 mmol, 2.5 mol%),  $\text{AgSbF}_6$  (6.9 mg, 0.020 mmol, 10 mol%),  $\text{NaOAc}$  (16.4 mg, 0.20 mmol, 1.0 equiv), and DCM (1.0 mL, 0.20 M) was stirred at 100 °C for 3-20 h (heating mantle). Then the reaction mixture was purified by flash column chromatography on silica with an appropriate solvent to afford the pure product **5**.

## 5. Characterization of products

(*Z*)-2-(2-(2-(dimethyl(oxo)- $\lambda^6$ -sulfaneylidene)acetyl)phenyl)-2-fluorovinyl 4-methylbenzenesulfonate (**3a**)

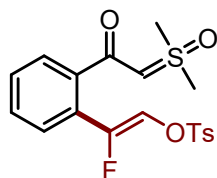

Following the general procedure A, the product **3a** was obtained in 90% yield (73.8 mg, 0.20 mmol) as a brown solid after column chromatography (eluent = EA/PE : 1/1 v/v). RF (EA/PE, 3:1): 0.21.  $^1\text{H}$  NMR (400 MHz,  $\text{CDCl}_3$ )  $\delta$  7.87 (d,  $J$  = 8.2 Hz, 2H), 7.48 (d,  $J$  = 7.4 Hz, 1H), 7.41 – 7.32 (m, 4H), 7.29 (t,  $J$  = 8.5 Hz, 1H), 6.63 (d,  $J$  = 18.8 Hz, 1H), 4.70 (s, 1H), 3.51 (s, 6H), 2.44 (s, 3H).  $^{13}\text{C}$  NMR (101 MHz,  $\text{CDCl}_3$ )  $\delta$  184.26, 151.39 (d,  $J$  = 258.0 Hz), 145.78, 141.16, 132.11, 130.18, 130.06, 128.96, 128.44 (d,  $J$  = 4.7 Hz), 128.20, 127.98, 125.89 (d,  $J$  = 22.4 Hz), 119.81 (d,  $J$  = 14.0 Hz), 72.22, 41.79, 21.74.  $^{19}\text{F}$  NMR (376 MHz,  $\text{CDCl}_3$ )  $\delta$  -115.18. **HRMS (ESI)**  $m/z$  calcd. for  $\text{C}_{19}\text{H}_{20}\text{FO}_5\text{S}_2$  [ $\text{M}+\text{H}$ ] $^+$  411.0736; Found 411.0737.

(*Z*)-2-(2-(2-(dimethyl(oxo)- $\lambda^6$ -sulfaneylidene)acetyl)-5-fluorophenyl)-2-fluorovinyl 4-methylbenzenesulfonate (**3b**)

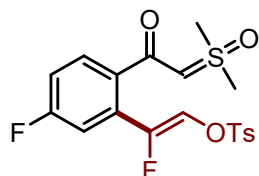

Following the general procedure A, the product **3b** was obtained in 71% yield (60.8 mg, 0.20 mmol) as a brown solid after column chromatography (eluent = EA/PE : 1/1 v/v). RF (EA/PE, 3:1): 0.23.  $^1\text{H}$  NMR (400 MHz,  $\text{CDCl}_3$ )  $\delta$  7.86 (d,  $J$  = 8.1 Hz, 2H), 7.49 – 7.43 (m, 1H), 7.37 (d,  $J$  = 7.9 Hz, 2H), 7.06 (t,  $J$  = 8.2 Hz, 1H), 6.99 (d,  $J$  = 9.2 Hz, 1H), 6.70 (d,  $J$  = 18.8 Hz, 1H), 4.66 (s, 1H), 3.52 (s, 6H), 2.44 (s, 3H).  $^{13}\text{C}$  NMR (101 MHz,  $\text{CDCl}_3$ )  $\delta$  183.28, 162.33 (d,  $J$  = 249.5 Hz), 149.71 (d,  $J$  = 259.4 Hz), 145.91, 137.22, 132.03, 130.20 (d,  $J$  = 8.5 Hz), 130.10, 128.19, 128.02 (d,  $J$  = 8.3 Hz), 120.65 (d,  $J$  = 13.5 Hz), 116.81 (d,  $J$  = 21.2 Hz), 115.15 (dd,  $J$  = 23.5, 5.6 Hz), 72.38, 41.87, 21.76.  $^{19}\text{F}$  NMR (376 MHz,  $\text{CDCl}_3$ )  $\delta$  -73.76, -118.03. **HRMS (ESI)**  $m/z$  calcd. for  $\text{C}_{19}\text{H}_{19}\text{F}_2\text{O}_5\text{S}_2$  [ $\text{M}+\text{H}$ ] $^+$  429.0642; Found 429.0632.

(*Z*)-2-(5-chloro-2-(2-(dimethyl(oxo)- $\lambda^6$ -sulfaneylidene)acetyl)phenyl)-2-fluorovinyl 4-methylbenzenesulfonate (**3c**)

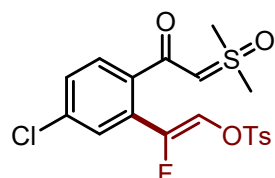

Following the general procedure A, the product **3c** was obtained in 76%



yield (67.5 mg, 0.20 mmol) as a brown solid after column chromatography (eluent = EA/PE : 1/1 v/v). RF (EA/PE, 3:1): 0.20. <sup>1</sup>H NMR (400 MHz, CDCl<sub>3</sub>) δ 7.87 (d, *J* = 8.3 Hz, 2H), 7.47 – 7.32 (m, 4H), 7.28 (d, *J* = 1.9 Hz, 1H), 6.69 (d, *J* = 18.8 Hz, 1H), 4.68 (s, 1H), 3.52 (s, 6H), 2.46 (s, 3H). <sup>13</sup>C NMR (101 MHz, CDCl<sub>3</sub>) δ 183.12, 149.84 (d, *J* = 257.7 Hz), 146.01, 139.45, 134.85, 132.08, 130.19, 130.09, 129.57, 128.27, 128.20 (d, *J* = 5.3 Hz), 127.76 (d, *J* = 22.9 Hz), 120.71 (d, *J* = 13.5 Hz), 72.52, 41.93, 21.85. <sup>19</sup>F NMR (376 MHz, CDCl<sub>3</sub>) δ -117.04. **HRMS (ESI) *m/z*** calcd. for C<sub>19</sub>H<sub>19</sub>ClFO<sub>5</sub>S<sub>2</sub> [M+H]<sup>+</sup> 445.0346; Found 445.0347.

(*Z*)-2-(5-bromo-2-(2-(dimethyl(oxo)-λ<sup>6</sup>-sulfaneylidene)acetyl)phenyl)-2-fluorovinyl 4-methylbenzenesulfonate (**3d**)

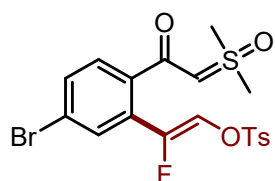

Following the general procedure A, the product **3d** was obtained in 73% yield (71.4 mg, 0.20 mmol) as a brown solid after column chromatography (eluent = EA/PE : 1/1 v/v). RF (EA/PE, 3:1): 0.30. <sup>1</sup>H NMR (400 MHz, CDCl<sub>3</sub>) δ 7.86 (d, *J* = 8.3 Hz, 2H), 7.50 (dd, *J* = 8.2, 1.4 Hz, 1H), 7.43 (d, *J* = 1.5 Hz, 1H), 7.38 (d, *J* = 8.1 Hz, 2H), 7.35 (d, *J* = 8.2 Hz, 1H), 6.68 (d, *J* = 18.8 Hz, 1H), 4.67 (s, 1H), 3.52 (s, 6H), 2.46 (s, 3H). <sup>13</sup>C NMR (101 MHz, CDCl<sub>3</sub>) δ 183.13, 149.73 (d, *J* = 257.8 Hz), 146.01, 139.90, 133.05, 132.07, 131.04 (d, *J* = 5.1 Hz), 130.20, 129.69, 128.27, 127.94 (d, *J* = 22.8 Hz), 122.83, 120.72 (d, *J* = 13.5 Hz), 72.49, 41.93, 21.85. <sup>19</sup>F NMR (376 MHz, CDCl<sub>3</sub>) δ -117.10. <sup>13</sup>C NMR (101 MHz, CDCl<sub>3</sub>) δ 183.21, 149.67 (d, *J* = 258.1 Hz), 146.01, 140.44, 139.05, 136.87 (d, *J* = 5.0 Hz), 132.05, 130.20, 129.63, 128.27, 127.89 (d, *J* = 22.6 Hz), 120.60 (d, *J* = 13.5 Hz), 94.40, 72.54, 41.88, 21.86. <sup>19</sup>F NMR (376 MHz, CDCl<sub>3</sub>) δ -116.80. **HRMS (ESI) *m/z*** calcd. for C<sub>19</sub>H<sub>19</sub>BrFO<sub>5</sub>S<sub>2</sub> [M+H]<sup>+</sup> 488.9841; Found 488.9831.

(*Z*)-2-(2-(2-(dimethyl(oxo)-λ<sup>6</sup>-sulfaneylidene)acetyl)-5-iodophenyl)-2-fluorovinyl 4-methylbenzenesulfonate (**3e**)

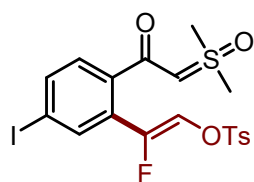

Following the general procedure A, the product **3e** was obtained in 65% yield (69.7 mg, 0.20 mmol) as a brown solid after column chromatography (eluent = EA/PE : 1/1 v/v). RF (EA/PE, 3:1): 0.26. <sup>1</sup>H NMR (400 MHz, CDCl<sub>3</sub>) δ 7.85 (d, *J* = 8.2 Hz, 2H), 7.69 (d, *J* = 8.1 Hz, 1H), 7.61 (s, 1H), 7.37 (d, *J* = 8.2 Hz, 2H), 7.19 (d, *J* = 8.1 Hz, 1H), 6.64 (d, *J* = 18.7 Hz, 1H),

4.67 (s, 1H), 3.50 (s, 6H), 2.44 (s, 3H).  $^{13}\text{C}$  NMR (101 MHz,  $\text{CDCl}_3$ )  $\delta$  183.21, 149.67 (d,  $J = 258.1$  Hz), 146.01, 140.44, 139.05, 136.87 (d,  $J = 5.0$  Hz), 132.05, 130.20, 129.63, 128.27, 127.89 (d,  $J = 22.6$  Hz), 120.60 (d,  $J = 13.5$  Hz), 94.40, 72.54, 41.88, 21.86.  $^{19}\text{F}$  NMR (376 MHz,  $\text{CDCl}_3$ )  $\delta$  -115.09. **HRMS (ESI)**  $m/z$  calcd. for  $\text{C}_{19}\text{H}_{19}\text{FIO}_5\text{S}_2$   $[\text{M}+\text{H}]^+$  536.9702; Found 536.9699.

(*Z*)-2-(2-(2-(dimethyl(oxo)- $\lambda^6$ -sulfaneylidene)acetyl)-5-(trifluoromethyl)phenyl)-2-fluorovinyl 4-methylbenzenesulfonate (**3f**)

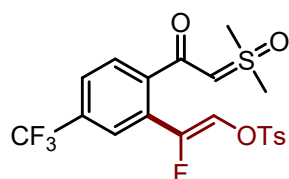

Following the general procedure A, the product **3f** was obtained in 70% yield (66.9 mg, 0.20 mmol) as a brown solid after column chromatography (eluent = EA/PE : 1/1 v/v). RF (EA/PE, 3:1): 0.25.

$^1\text{H}$  NMR (400 MHz,  $\text{CDCl}_3$ )  $\delta$  7.86 (d,  $J = 8.2$  Hz, 2H), 7.62 (d,  $J = 8.0$  Hz, 1H), 7.58 (s, 1H), 7.55 (d,  $J = 5.3$  Hz, 1H), 7.37 (d,  $J = 8.0$  Hz, 2H), 6.77 (d,  $J = 18.9$  Hz, 1H), 4.69 (s, 1H), 3.54 (s, 6H), 2.45 (s, 3H).  $^{13}\text{C}$  NMR (101 MHz,  $\text{CDCl}_3$ )  $\delta$  182.87, 149.56 (d,  $J = 257.0$  Hz), 146.13, 144.17 (d,  $J = 1.5$  Hz), 132.03, 131.19 (d,  $J = 33.1$  Hz), 130.24, 128.71, 128.30, 126.93 (d,  $J = 18.2$  Hz), 126.79, 125.11 (q,  $J = 9.0$  Hz), 123.48 (q,  $J = 272.5$  Hz), 121.06 (d,  $J = 13.3$  Hz), 72.99, 41.97, 21.85.  $^{19}\text{F}$  NMR (376 MHz,  $\text{CDCl}_3$ )  $\delta$  -62.88, -118.10. **HRMS (ESI)**  $m/z$  calcd. for  $\text{C}_{20}\text{H}_{19}\text{F}_4\text{O}_5\text{S}_2$   $[\text{M}+\text{H}]^+$  479.0610; Found 479.0604.

(*Z*)-2-(2-(2-(dimethyl(oxo)- $\lambda^6$ -sulfaneylidene)acetyl)-5-(trifluoromethoxy)phenyl)-2-fluorovinyl 4-methylbenzenesulfonate (**3g**)

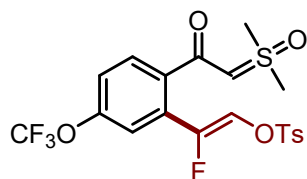

Following the general procedure A, the product **3g** was obtained in 82% yield (81.0 mg, 0.20 mmol) as a brown solid after column chromatography (eluent = EA/PE : 1/1 v/v). RF (EA/PE, 3:1): 0.28.

$^1\text{H}$  NMR (400 MHz,  $\text{CDCl}_3$ )  $\delta$  7.85 (d,  $J = 8.2$  Hz, 2H), 7.49 (d,  $J = 8.4$  Hz, 1H), 7.37 (d,  $J = 8.1$  Hz, 2H), 7.21 (d,  $J = 8.3$  Hz, 1H), 7.13 (s, 1H), 6.74 (d,  $J = 18.9$  Hz, 1H), 4.69 (s, 1H), 3.52 (s, 6H), 2.44 (s, 3H).  $^{13}\text{C}$  NMR (101 MHz,  $\text{CDCl}_3$ )  $\delta$  182.99, 149.45 (d,  $J = 257.0$  Hz), 149.17, 146.07, 139.57, 132.03, 130.20, 129.91, 128.28, 128.05 (d,  $J = 23.3$  Hz), 122.09, 120.99 (d,  $J = 13.3$  Hz), 120.54 (d,  $J = 5.2$  Hz), 120.37 (d,  $J = 258.4$  Hz), 72.82, 41.92, 21.82.  $^{19}\text{F}$  NMR (376 MHz,  $\text{CDCl}_3$ )  $\delta$  -57.83, -117.93. **HRMS (ESI)**  $m/z$  calcd. for  $\text{C}_{20}\text{H}_{19}\text{F}_4\text{O}_6\text{S}_2$   $[\text{M}+\text{H}]^+$  495.0559; Found 495.0555.

methyl (Z)-4-(2-(dimethyl(oxo)- $\lambda^6$ -sulfaneylidene)acetyl)-3-(1-fluoro-2-(tosyloxy)vinyl)benzoate  
(3h)

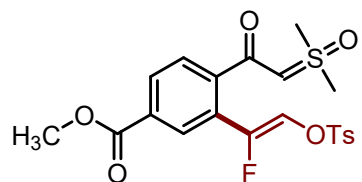

Following the general procedure A, the product **3h** was obtained in 75% yield (70.2 mg, 0.20 mmol) as a brown solid after column chromatography (eluent = EA/PE : 1/1 v/v). RF (EA/PE, 3:1): 0.22.  $^1\text{H}$  NMR (400 MHz,  $\text{CDCl}_3$ )  $\delta$  8.03 (d,  $J = 8.0$  Hz, 1H), 7.96 (s, 1H), 7.87 (d,  $J = 8.1$  Hz, 2H), 7.54 (d,  $J = 7.9$  Hz, 1H), 7.38 (d,  $J = 8.1$  Hz, 2H), 6.72 (d,  $J = 18.8$  Hz, 1H), 4.71 (s, 1H), 3.92 (s, 3H), 3.54 (s, 6H), 2.45 (s, 3H).  $^{13}\text{C}$  NMR (101 MHz,  $\text{CDCl}_3$ )  $\delta$  183.14, 165.80, 150.25 (d,  $J = 257.6$  Hz), 145.91, 144.93, 132.00, 131.05, 130.55, 130.11, 129.44 (d,  $J = 5.1$  Hz), 128.22, 128.19, 126.33 (d,  $J = 23.0$  Hz), 120.50 (d,  $J = 13.6$  Hz), 72.71, 52.45, 41.81, 21.74.  $^{19}\text{F}$  NMR (376 MHz,  $\text{CDCl}_3$ )  $\delta$  -116.69. **HRMS (ESI)**  $m/z$  calcd. for  $\text{C}_{21}\text{H}_{22}\text{FO}_7\text{S}_2$   $[\text{M}+\text{H}]^+$  469.0791; Found 469.0790.

(Z)-2-(4-(2-(dimethyl(oxo)- $\lambda^6$ -sulfaneylidene)acetyl)-[1,1'-biphenyl]-3-yl)-2-fluorovinyl 4-methylbenzenesulfonate (3i)

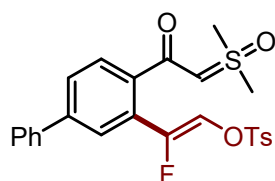

Following the general procedure A, the product **3i** was obtained in 49% yield (47.6 mg, 0.20 mmol) as a brown solid after column chromatography (eluent = EA/PE : 1/1 v/v). RF (EA/PE, 3:1): 0.33.  $^1\text{H}$  NMR (400 MHz,  $\text{CDCl}_3$ )  $\delta$  7.88 (d,  $J = 8.1$  Hz, 2H), 7.58 (d,  $J = 7.2$  Hz, 2H), 7.53 (d,  $J = 7.5$  Hz, 2H), 7.48 (s, 1H), 7.44 (t,  $J = 7.4$  Hz, 2H), 7.40 – 7.34 (m, 3H), 6.67 (d,  $J = 18.7$  Hz, 1H), 4.74 (s, 1H), 3.54 (s, 6H), 2.44 (s, 3H).  $^{13}\text{C}$  NMR (101 MHz,  $\text{CDCl}_3$ )  $\delta$  184.08, 151.41 (d,  $J = 258.3$  Hz), 145.85, 142.20, 142.17, 139.84, 139.59, 132.26, 130.15, 129.06, 128.81, 128.33, 128.16, 127.28 (d,  $J = 5.0$  Hz), 127.20, 126.61 (d,  $J = 22.3$  Hz), 120.12 (d,  $J = 14.0$  Hz), 72.18, 41.99, 21.84.  $^{19}\text{F}$  NMR (376 MHz,  $\text{CDCl}_3$ )  $\delta$  -115.09.  $^{19}\text{F}$  NMR (376 MHz,  $\text{CDCl}_3$ )  $\delta$  -116.76. **HRMS (ESI)**  $m/z$  calcd. for  $\text{C}_{25}\text{H}_{24}\text{FO}_5\text{S}_2$   $[\text{M}+\text{H}]^+$  487.1049; 487.1052.

(Z)-2-(2-(2-(dimethyl(oxo)- $\lambda^6$ -sulfaneylidene)acetyl)-5-methylphenyl)-2-fluorovinyl 4-methylbenzenesulfonate (3j)

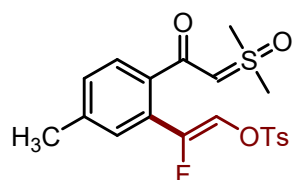

Following the general procedure A, the product **3j** was obtained in 81%

yield (68.7 mg, 0.20 mmol) as a brown solid after column chromatography (eluent = EA/PE : 1/1 v/v). RF (EA/PE, 3:1): 0.25. <sup>1</sup>H NMR (400 MHz, CDCl<sub>3</sub>) δ 7.86 (d, *J* = 8.3 Hz, 2H), 7.40 – 7.33 (m, 3H), 7.18 (d, *J* = 7.8 Hz, 1H), 7.07 (s, 1H), 6.57 (d, *J* = 18.7 Hz, 1H), 4.67 (s, 1H), 3.49 (s, 6H), 2.44 (s, 3H), 2.32 (s, 3H). <sup>13</sup>C NMR (101 MHz, CDCl<sub>3</sub>) δ 184.44, 151.75 (d, *J* = 258.5 Hz), 145.79, 139.26, 138.46, 132.28, 130.92, 130.11, 129.20 (d, *J* = 4.3 Hz), 128.29, 128.21, 125.94 (d, *J* = 22.1 Hz), 119.71 (d, *J* = 14.2 Hz), 71.96, 41.92, 21.83, 21.19. <sup>19</sup>F NMR (376 MHz, CDCl<sub>3</sub>) δ -114.63. **HRMS (ESI)** *m/z* calcd. for C<sub>20</sub>H<sub>22</sub>FO<sub>5</sub>S<sub>2</sub> [M+H]<sup>+</sup> 425.0892; Found 425.0896.

(*Z*)-2-(4-chloro-2-(2-(dimethyl(oxo)-λ<sup>6</sup>-sulfaneylidene)acetyl)phenyl)-2-fluorovinyl 4-methylbenzenesulfonate (**3k**)

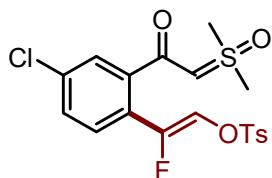

Following the general procedure A, the product **3l** was obtained in 68% yield (60.5 mg, 0.20 mmol) as a brown solid after column chromatography (eluent = EA/PE : 1/1 v/v). RF (EA/PE, 3:1): 0.29. <sup>1</sup>H NMR (400 MHz, CDCl<sub>3</sub>) δ 7.85 (d, *J* = 8.2 Hz, 2H), 7.44 (s, 1H), 7.36 (d, *J* = 8.1 Hz, 2H), 7.29 (d, *J* = 8.3 Hz, 1H), 7.22 (d, *J* = 8.3 Hz, 1H), 6.66 (d, *J* = 18.8 Hz, 1H), 4.66 (s, 1H), 3.51 (s, 6H), 2.44 (s, 3H). <sup>13</sup>C NMR (101 MHz, CDCl<sub>3</sub>) δ 182.55, 150.19 (d, *J* = 257.1 Hz), 145.93, 142.60, 136.20, 132.16, 130.16, 129.67 (d, *J* = 4.8 Hz), 129.05, 128.32, 128.28, 124.50 (d, *J* = 23.1 Hz), 120.31 (d, *J* = 13.8 Hz), 72.46, 41.97, 21.85. <sup>19</sup>F NMR (376 MHz, CDCl<sub>3</sub>) δ -116.63. **HRMS (ESI)** *m/z* calcd. for C<sub>19</sub>H<sub>19</sub>ClFO<sub>5</sub>S<sub>2</sub> [M+H]<sup>+</sup> 445.0345; Found 445.0347.

(*Z*)-2-(2-(2-(dimethyl(oxo)-λ<sup>6</sup>-sulfaneylidene)acetyl)-4-methylphenyl)-2-fluorovinyl 4-methylbenzenesulfonate (**3l**)

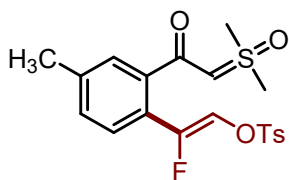

Following the general procedure A, the product **3m** was obtained in 52% yield (44.1 mg, 0.20 mmol) as a brown solid after column chromatography (eluent = EA/PE : 1/1 v/v). RF (EA/PE, 3:1): 0.23. <sup>1</sup>H NMR (400 MHz, CDCl<sub>3</sub>) δ 7.86 (d, *J* = 8.2 Hz, 2H), 7.35 (d, *J* = 8.1 Hz, 2H), 7.29 (s, 1H), 7.16 (d, *J* = 7.9 Hz, 1H), 7.12 (d, *J* = 8.0 Hz, 1H), 6.56 (d, *J* = 18.7 Hz, 1H), 4.66 (s, 1H), 3.51 (s, 6H), 2.44 (s, 3H), 2.34 (s, 3H). <sup>13</sup>C NMR (101 MHz, CDCl<sub>3</sub>) δ 184.58, 151.65 (d, *J* = 258.2 Hz), 145.77, 140.68, 132.29, 130.10, 129.69, 128.79, 128.52 (d, *J* = 4.6 Hz), 128.37, 128.31, 123.14 (d, *J* = 22.5 Hz), 119.48 (d, *J* = 14.4 Hz), 71.95, 41.96, 21.84, 21.35. <sup>19</sup>F

NMR (376 MHz, CDCl<sub>3</sub>)  $\delta$  -114.52. **HRMS (ESI)**  $m/z$  calcd. for C<sub>20</sub>H<sub>22</sub>FO<sub>5</sub>S<sub>2</sub> [M+H]<sup>+</sup> 425.0892; Found 425.0896.

(Z)-2-(3-chloro-2-(2-(dimethyl(oxo)- $\lambda^6$ -sulfaneylidene)acetyl)phenyl)-2-fluorovinyl 4-methylbenzenesulfonate (**3m**)

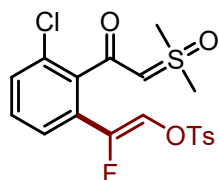

Following the general procedure A, the product **3n** was obtained in 66% yield (58.7 mg, 0.20 mmol) as a brown solid after column chromatography (eluent = EA/PE : 1/1 v/v). RF (EA/PE, 3:1): 0.28. <sup>1</sup>H NMR (400 MHz, CDCl<sub>3</sub>)  $\delta$  7.85 (d,  $J$  = 8.2 Hz, 2H), 7.37 (t,  $J$  = 7.9 Hz, 3H), 7.26 (dd,  $J$  = 9.8, 7.1 Hz, 2H), 6.94 (d,  $J$  = 19.3 Hz, 1H), 4.52 (s, 1H), 3.56 (s, 6H), 2.44 (s, 3H). <sup>13</sup>C NMR (101 MHz, CDCl<sub>3</sub>)  $\delta$  181.12, 148.94 (d,  $J$  = 255.9 Hz), 145.97, 139.28, 132.07, 132.02, 131.16, 130.19, 129.05, 128.29, 127.78 (d,  $J$  = 23.6 Hz), 125.71 (d,  $J$  = 5.6 Hz), 121.21 (d,  $J$  = 13.3 Hz), 73.20, 42.07, 21.84. <sup>19</sup>F NMR (376 MHz, CDCl<sub>3</sub>)  $\delta$  -119.79. **HRMS (ESI)**  $m/z$  calcd. for C<sub>19</sub>H<sub>19</sub>ClFO<sub>5</sub>S<sub>2</sub> [M+H]<sup>+</sup> 445.036; Found 445.0347.

(Z)-2-(2-(2-(dimethyl(oxo)- $\lambda^6$ -sulfaneylidene)acetyl)-3-methylphenyl)-2-fluorovinyl 4-methylbenzenesulfonate (**3n**)

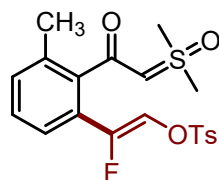

Following the general procedure A, the product **3o** was obtained in 65% yield (55.1 mg, 0.20 mmol) as a brown solid after column chromatography (eluent = EA/PE : 1/1 v/v). RF (EA/PE, 3:1): 0.31. <sup>1</sup>H NMR (400 MHz, CDCl<sub>3</sub>)  $\delta$  7.83 (d,  $J$  = 8.2 Hz, 2H), 7.35 (d,  $J$  = 8.1 Hz, 2H), 7.19 (t,  $J$  = 6.7 Hz, 2H), 7.12 (d,  $J$  = 6.7 Hz, 1H), 6.68 (d,  $J$  = 19.0 Hz, 1H), 4.53 (s, 1H), 3.52 (s, 6H), 2.43 (s, 3H), 2.38 (s, 3H). <sup>13</sup>C NMR (101 MHz, CDCl<sub>3</sub>)  $\delta$  184.95, 151.08 (d,  $J$  = 257.6 Hz), 145.88, 140.78, 135.47, 132.22, 132.11, 130.14, 128.26, 127.94, 125.50 (d,  $J$  = 22.4 Hz), 125.07 (d,  $J$  = 4.9 Hz), 119.95 (d,  $J$  = 14.2 Hz), 73.21, 41.88, 21.82, 19.32. <sup>19</sup>F NMR (376 MHz, CDCl<sub>3</sub>)  $\delta$  -115.96. **HRMS (ESI)**  $m/z$  calcd. for C<sub>20</sub>H<sub>22</sub>FO<sub>5</sub>S<sub>2</sub> [M+H]<sup>+</sup> 425.0892; Found 425.0896.

(Z)-2-(3-(2-(dimethyl(oxo)- $\lambda^6$ -sulfaneylidene)acetyl)naphthalen-2-yl)-2-fluorovinyl 4-methylbenzenesulfonate (**3o**)

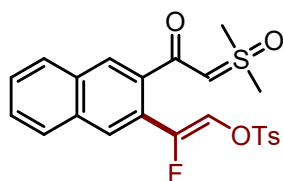

Following the general procedure A, the product **3p** was obtained in 50%

yield (46.0 mg, 0.20 mmol) as a brown solid after column chromatography (eluent = EA/PE : 1/1 v/v). RF (EA/PE, 3:1): 0.35. <sup>1</sup>H NMR (400 MHz, CDCl<sub>3</sub>) δ 7.98 (s, 1H), 7.90 (d, *J* = 8.2 Hz, 2H), 7.82 – 7.74 (m, 3H), 7.52 (dd, *J* = 6.1, 3.2 Hz, 2H), 7.36 (d, *J* = 8.2 Hz, 2H), 6.72 (d, *J* = 18.5 Hz, 1H), 4.83 (s, 1H), 3.56 (s, 6H), 2.43 (s, 3H). <sup>13</sup>C NMR (101 MHz, CDCl<sub>3</sub>) δ 184.35, 152.06 (d, *J* = 257.8 Hz), 145.77, 137.63, 133.39, 132.73, 132.34, 130.12, 129.09, 128.85, 128.33, 128.16, 127.98, 127.67, 125.76, 124.02 (d, *J* = 22.3 Hz), 119.77 (d, *J* = 14.2 Hz), 71.92, 41.96, 21.83. <sup>19</sup>F NMR (376 MHz, CDCl<sub>3</sub>) δ -119.81. **HRMS (ESI)** *m/z* calcd. for C<sub>23</sub>H<sub>22</sub>FO<sub>5</sub>S<sub>2</sub> [M+H]<sup>+</sup> 461.0890; Found 461.0900.

(*Z*)-2-(2-(2-(dimethyl(oxo)-λ<sup>6</sup>-sulfaneylidene)acetyl)-5-(*N,N*-dipropylsulfamoyl)phenyl)-2-fluorovinyl 4-methylbenzenesulfonate (**3p**)

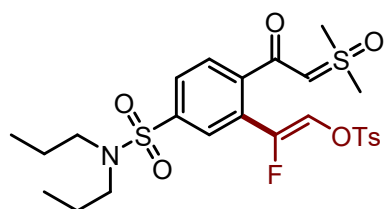

Following the general procedure A, the product **3p** was obtained in 63% yield (72.2 mg, 0.20 mmol) as a brown solid after column chromatography (eluent = EA/PE : 1/1 v/v). RF (EA/PE, 3:1): 0.25. <sup>1</sup>H NMR (400 MHz, CDCl<sub>3</sub>) δ 7.84 (d, *J* = 8.1 Hz, 2H), 7.76 (d, *J* = 8.0 Hz, 1H), 7.71 (s, 1H), 7.56 (d, *J* = 8.0 Hz, 1H), 7.37 (d, *J* = 8.0 Hz, 2H), 6.75 (d, *J* = 18.9 Hz, 1H), 4.70 (s, 1H), 3.53 (s, 6H), 3.07 – 2.98 (m, 4H), 2.44 (s, 3H), 1.58 – 1.47 (m, 4H), 0.85 (t, *J* = 7.3 Hz, 6H). <sup>13</sup>C NMR (101 MHz, CDCl<sub>3</sub>) δ 182.58, 149.30 (d, *J* = 257.2 Hz), 146.07, 144.26, 140.79, 131.88, 130.18, 128.84, 128.23, 128.18, 127.04 (d, *J* = 23.1 Hz), 126.53 (d, *J* = 5.2 Hz), 121.11 (d, *J* = 13.2 Hz), 73.17, 50.07, 41.82, 22.04, 21.77, 11.16. <sup>19</sup>F NMR (376 MHz, CDCl<sub>3</sub>) δ -117.86. **HRMS (ESI)** *m/z* calcd. for C<sub>25</sub>H<sub>33</sub>FNO<sub>7</sub>S<sub>3</sub> [M+H]<sup>+</sup> 574.1403; Found 574.1396.

5-hydroxy-10-(2-oxo-2-phenylethyl)-5-phenyl-5,6-dihydro-3H-[1,2,4]oxadiazolo[3,4-a]isoquinolin-3-one (**5a**)

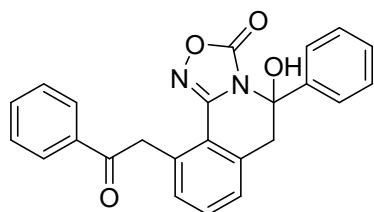

Following the general procedure B, the product **5a** was obtained in 88% yield (70.0 mg, 0.20 mmol) as a yellow solid after column chromatography (eluent = PE/EA 4:1, v/v). Rf (PE/EA 4:1): 0.20. <sup>1</sup>H NMR (400 MHz, CDCl<sub>3</sub>) δ 8.07 (d, *J* = 8.2 Hz, 2H), 7.65 – 7.59 (m, 1H), 7.52 (t, *J* = 7.7 Hz, 2H), 7.42 (t, *J* = 7.7 Hz, 1H), 7.38 – 7.30 (m,

5H), 7.23 (d,  $J = 7.6$  Hz, 1H), 7.12 (d,  $J = 7.6$  Hz, 1H), 4.97 (d,  $J = 17.6$  Hz, 1H), 4.74 (d,  $J = 17.6$  Hz, 1H), 3.74 (d,  $J = 15.9$  Hz, 1H), 3.45 (d,  $J = 15.9$  Hz, 1H).  $^{13}\text{C}$  NMR (101 MHz,  $\text{CDCl}_3$ )  $\delta$  196.87, 157.21, 154.61, 140.25, 137.04, 135.31, 134.46, 133.42, 132.57, 132.00, 129.40, 129.07, 128.82, 128.38, 128.35, 124.86, 119.72, 86.24, 45.70, 45.27. **HRMS (ESI)**  $m/z$  calcd. for  $\text{C}_{24}\text{H}_{18}\text{N}_2\text{O}_4$   $[\text{M}+\text{Na}]^+$  421.1165; Found 421.1165.

8-fluoro-5-hydroxy-10-(2-oxo-2-phenylethyl)-5-phenyl-5,6-dihydro-3H-[1,2,4]oxadiazolo[3,4-a]isoquinolin-3-one (**5b**)

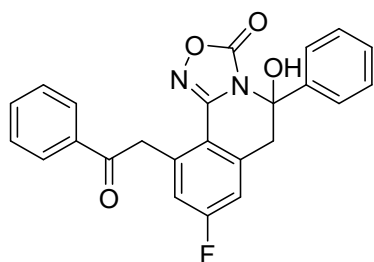

Following the general procedure B, the product **5b** was obtained in 73% yield (60.7 mg, 0.20 mmol) as a yellow solid after column chromatography (eluent = PE/EA 4:1, v/v).  $R_f$  (PE/EA 4:1): 0.21.  $^1\text{H}$  NMR (400 MHz, DMSO)  $\delta$  8.08 (d,  $J = 7.9$  Hz, 2H), 7.97 (d,  $J = 8.0$  Hz, 1H), 7.71 – 7.65 (m, 1H), 7.64 – 7.57 (m, 4H), 7.54 (t,  $J = 7.7$  Hz, 1H), 7.42 – 7.35 (m, 2H), 7.31 (d,  $J = 9.3$  Hz, 2H), 4.96 (d,  $J = 17.9$  Hz, 1H), 4.89 (d,  $J = 17.8$  Hz, 1H), 4.57 (s, 1H), 3.68 (d,  $J = 16.4$  Hz, 1H), 3.35 (d,  $J = 16.4$  Hz, 1H).  $^{13}\text{C}$  NMR (101 MHz, DMSO)  $\delta$  196.50, 163.79 (d,  $J = 250.8$  Hz), 155.27, 154.34, 140.42, 139.24 (d,  $J = 12.3$  Hz), 137.04, 133.79, 129.28, 128.73, 128.54, 128.46, 126.39, 119.09 (d,  $J = 22.3$  Hz), 117.77 (d,  $J = 21.6$  Hz), 116.54 (d,  $J = 2.8$  Hz), 115.15 (d,  $J = 22.6$  Hz), 84.92, 45.88, 45.60.  $^{19}\text{F}$  NMR (376 MHz,  $\text{CDCl}_3$ )  $\delta$  -105.96. **HRMS (ESI)**  $m/z$  calcd. for  $\text{C}_{24}\text{H}_{17}\text{FN}_2\text{O}_4$   $[\text{M}+\text{Na}]^+$  439.1070; Found 439.1075.

8-chloro-5-hydroxy-10-(2-oxo-2-phenylethyl)-5-phenyl-5,6-dihydro-3H-[1,2,4]oxadiazolo[3,4-a]isoquinolin-3-one (**5c**)

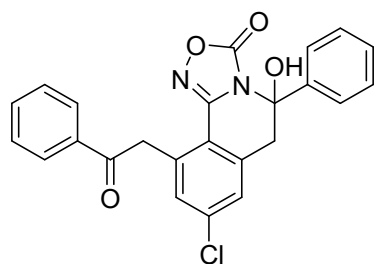

Following the general procedure B, the product **5c** was obtained in 76% yield (65.6 mg, 0.20 mmol) as a yellow solid after column chromatography (eluent = PE/EA 4:1, v/v).  $R_f$  (PE/EA 4:1): 0.26.  $^1\text{H}$  NMR (400 MHz, DMSO)  $\delta$  8.12 – 8.04 (m, 2H), 7.96 (d,  $J = 7.4$  Hz, 1H), 7.72 – 7.65 (m, 1H), 7.63 – 7.57 (m, 4H), 7.57 – 7.49 (m, 3H), 7.43 – 7.33 (m, 3H), 4.94 (d,  $J = 17.8$  Hz, 1H), 4.87 (d,  $J = 17.8$  Hz, 1H), 4.56 (s, 1H), 3.67 (d,  $J = 16.4$  Hz, 1H), 3.53 (d,  $J = 16.4$  Hz, 1H).  $^{13}\text{C}$  NMR (101

MHz, DMSO)  $\delta$  196.57, 155.20, 154.39, 140.35, 138.31, 137.85, 137.05, 136.73, 133.80, 131.75, 129.28, 128.74, 128.55, 128.46, 128.04, 126.42, 118.83, 84.97, 45.56, 45.36. **HRMS (ESI)**  $m/z$  calcd. for  $C_{24}H_{17}ClN_2O_4$   $[M+Na]^+$  455.0775; Found 455.0777.

8-bromo-5-hydroxy-10-(2-oxo-2-phenylethyl)-5-phenyl-5,6-dihydro-3H-[1,2,4]oxadiazolo[3,4-a]isoquinolin-3-one (**5d**)

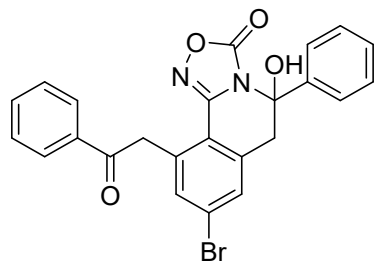

Following the general procedure B, the product **5d** was obtained in 79% yield (75.3 mg, 0.20 mmol) as a yellow solid after column chromatography (eluent = PE/EA 4:1, v/v).  $R_f$  (PE/EA 4:1): 0.24.  $^1H$  NMR (400 MHz, DMSO)  $\delta$  8.07 (d,  $J$  = 7.2 Hz, 2H), 7.96 (d,  $J$  = 7.3 Hz, 1H), 7.71 – 7.67 (m, 3H), 7.64 – 7.59 (m, 3H), 7.55 (t,  $J$  = 7.7 Hz, 1H), 7.38 (d,  $J$  = 7.5 Hz, 2H), 4.94 (d,  $J$  = 17.8 Hz, 1H), 4.87 (d,  $J$  = 17.8 Hz, 1H), 4.57 (s, 1H), 3.68 (d,  $J$  = 16.4 Hz, 1H), 3.68 (d,  $J$  = 16.4 Hz, 1H).  $^{13}C$  NMR (101 MHz, DMSO)  $\delta$  196.62, 155.21, 154.50, 140.35, 138.33, 137.83, 137.06, 136.57, 134.62, 133.99, 133.79, 130.95, 129.29, 128.46, 126.43, 125.82, 119.18, 84.98, 45.45, 45.30. **HRMS (ESI)**  $m/z$  calcd. for  $C_{24}H_{17}BrN_2O_4$   $[M+Na]^+$  499.0270; Found 499.0273.

5-hydroxy-10-(2-oxo-2-phenylethyl)-5-phenyl-8-(trifluoromethyl)-5,6-dihydro-3H-[1,2,4]oxadiazolo[3,4-a]isoquinolin-3-one (**5e**)

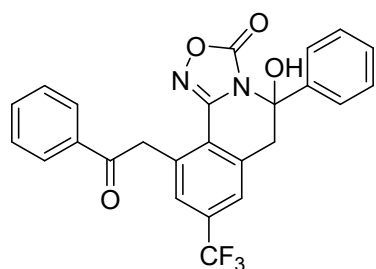

Following the general procedure B, the product **5e** was obtained in 82% yield (76.4 mg, 0.20 mmol) as a pale yellow liquid after column chromatography (eluent = PE/EA 4:1, v/v).  $R_f$  (PE/EA 4:1): 0.23.  $^1H$  NMR (400 MHz,  $CDCl_3$ )  $\delta$  8.09 (d,  $J$  = 7.2 Hz, 2H), 7.67 (t,  $J$  = 7.4 Hz, 1H), 7.56 (t,  $J$  = 7.6 Hz, 2H), 7.52 (s, 1H), 7.44 – 7.38 (m, 4H), 7.37 – 7.33 (m, 2H), 5.25 (s, 1H), 5.08 (d,  $J$  = 17.6 Hz, 1H), 4.82 (d,  $J$  = 17.6 Hz, 1H), 3.80 (d,  $J$  = 16.1 Hz, 1H), 3.55 (d,  $J$  = 16.2 Hz, 1H).  $^{13}C$  NMR (101 MHz,  $CDCl_3$ )  $\delta$  195.83, 156.73, 153.77, 139.60, 136.60, 136.40, 135.29, 134.22 (q,  $J$  = 50.8 Hz), 133.62, 129.60, 129.16, 128.83, 128.60 (q,  $J$  = 3.6 Hz), 128.24, 125.04 (q,  $J$  = 3.8 Hz), 124.70, 123.06 (q,  $J$  = 273.2 Hz), 86.09, 45.67, 45.21.  $^{19}F$  NMR (376 MHz,  $CDCl_3$ )  $\delta$  -63.25. **HRMS (ESI)**  $m/z$  calcd. for  $C_{25}H_{17}F_3N_2O_4$   $[M+Na]^+$  489.1038; Found 489.1043.



5-hydroxy-10-(2-oxo-2-phenylethyl)-5-phenyl-8-(trifluoromethoxy)-5,6-dihydro-3H-[1,2,4]oxadiazolo[3,4-a]isoquinolin-3-one (**5f**)

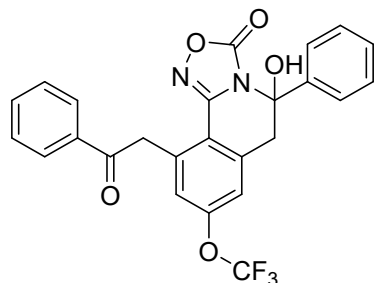

Following the general procedure B, the product **5f** was obtained in 81% yield (78.1 mg, 0.20 mmol) as a yellow solid after column chromatography (eluent = PE/EA 4:1, v/v). R<sub>f</sub> (PE/EA 4:1): 0.22. <sup>1</sup>H NMR (400 MHz, CDCl<sub>3</sub>) δ 7.98 (d, *J* = 7.2 Hz, 2H), 7.56 (t, *J* = 7.4 Hz, 1H), 7.45 (t, *J* = 7.6 Hz, 2H), 7.32 – 7.23 (m, 4H), 7.01 (s, 1H), 6.91 (s, 1H), 4.92 (d, *J* = 17.6 Hz, 1H), 4.66 (d, *J* = 17.6 Hz, 1H), 3.64 (d, *J* = 16.1 Hz, 1H), 3.38 (d, *J* = 16.3 Hz, 1H). <sup>13</sup>C NMR (101 MHz, CDCl<sub>3</sub>) δ 195.89, 156.82, 153.76, 151.39, 139.69, 138.03, 136.80, 136.62, 133.57, 129.50, 129.09, 128.80, 128.25, 124.74, 123.43, 120.18 (q, *J* = 259.7 Hz), 119.49, 118.06, 85.91, 45.61, 45.32. <sup>19</sup>F NMR (376 MHz, CDCl<sub>3</sub>) δ -57.38. **HRMS (ESI)** *m/z* calcd. for C<sub>25</sub>H<sub>17</sub>F<sub>3</sub>N<sub>2</sub>O<sub>5</sub> [M+H]<sup>+</sup> 483.1168; Found 483.1169.

5-(4-bromophenyl)-10-(2-(4-bromophenyl)-2-oxoethyl)-5-hydroxy-5,6-dihydro-3H-[1,2,4]oxadiazolo[3,4-a]isoquinolin-3-one (**5g**)

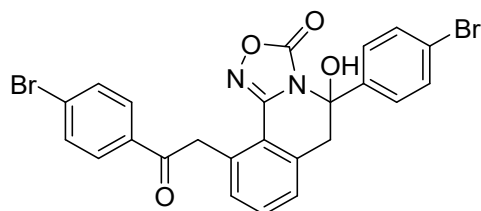

Following the general procedure B, the product **5g** was obtained in 67% yield (74.1 mg, 0.20 mmol) as a yellow solid after column chromatography (eluent = PE/EA 4:1, v/v). R<sub>f</sub> (PE/EA 4:1): 0.21. <sup>1</sup>H NMR (400 MHz, CDCl<sub>3</sub>) δ 7.85 (d, *J* = 8.6 Hz, 2H), 7.59 (d, *J* = 8.6 Hz, 2H), 7.42 (d, *J* = 8.7 Hz, 2H), 7.37 (t, *J* = 7.7 Hz, 1H), 7.19 – 7.12 (m, 3H), 7.07 (d, *J* = 7.6 Hz, 1H), 5.23 (s, 1H), 4.87 (d, *J* = 17.7 Hz, 1H), 4.58 (d, *J* = 17.7 Hz, 1H), 3.63 (d, *J* = 16.0 Hz, 1H), 3.32 (d, *J* = 16.0 Hz, 1H). <sup>13</sup>C NMR (101 MHz, CDCl<sub>3</sub>) δ 195.83, 156.88, 154.33, 139.15, 135.58, 134.85, 134.08, 132.69, 132.15, 132.07, 132.03, 129.76, 128.57, 128.45, 126.64, 123.67, 119.51, 85.74, 45.54, 45.12. **HRMS (ESI)** *m/z* calcd. for C<sub>24</sub>H<sub>16</sub>Br<sub>2</sub>N<sub>2</sub>O<sub>4</sub> [M+Na]<sup>+</sup> 576.9375; Found 576.9370.

5-hydroxy-10-(2-oxo-2-(4-(trifluoromethoxy)phenyl)ethyl)-5-(4-(trifluoromethoxy)phenyl)-5,6-dihydro-3H-[1,2,4]oxadiazolo[3,4-a]isoquinolin-3-one (**5h**)

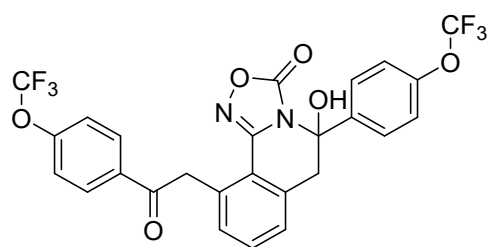

Following the general procedure B, the product **5h** was obtained in 68% yield (77.0 mg, 0.20 mmol) as a yellow solid after column chromatography (eluent = PE/EA 4:1, v/v). R<sub>f</sub> (PE/EA 4:1): 0.29. <sup>1</sup>H NMR (400 MHz, CDCl<sub>3</sub>) δ 8.11 (d, *J* = 8.7 Hz, 2H), 7.45 (t, *J* = 7.6 Hz, 1H), 7.39 (d, *J* = 8.7 Hz, 2H), 7.35 (d, *J* = 8.2 Hz, 2H), 7.25 (d, *J* = 8.9 Hz, 1H), 7.20 (d, *J* = 8.3 Hz, 2H), 7.16 (d, *J* = 7.6 Hz, 1H), 5.35 (s, 1H), 4.99 (d, *J* = 17.7 Hz, 1H), 4.66 (d, *J* = 17.7 Hz, 1H), 3.71 (d, *J* = 16.0 Hz, 1H), 3.41 (d, *J* = 16.0 Hz, 1H). <sup>13</sup>C NMR (101 MHz, CDCl<sub>3</sub>) δ 195.39, 156.87, 154.35, 152.83, 149.78, 138.66, 135.08, 134.79, 134.08, 132.74, 132.06, 130.28, 128.50, 126.67, 121.17, 122.90 (d, *J* = 258.4 Hz), 120.52, 120.34 (d, *J* = 257.7 Hz), 119.49, 85.60, 45.65, 45.21. <sup>19</sup>F NMR (376 MHz, CDCl<sub>3</sub>) δ -57.54, -57.76. **HRMS (ESI)** *m/z* calcd. for C<sub>26</sub>H<sub>16</sub>F<sub>6</sub>N<sub>2</sub>O<sub>6</sub> [M+Na]<sup>+</sup> 589.0811; Found 589.0813.

5-(3,5-dimethylphenyl)-10-(2-(3,5-dimethylphenyl)-2-oxoethyl)-5-hydroxy-5,6-dihydro-3H-[1,2,4]oxadiazolo[3,4-a]isoquinolin-3-one (**5i**)

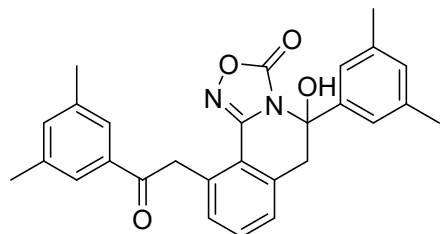

Following the general procedure B, the product **5i** was obtained in 79% yield (71.7 mg, 0.20 mmol) as a yellow solid after column chromatography (eluent = PE/EA 4:1, v/v). R<sub>f</sub> (PE/EA 4:1): 0.24. <sup>1</sup>H NMR (400 MHz, CDCl<sub>3</sub>) δ 7.70 – 7.61 (m, 2H), 7.37 (t, *J* = 7.7 Hz, 1H), 7.23 (s, 1H), 7.17 (d, *J* = 7.8 Hz, 1H), 7.08 (d, *J* = 7.6 Hz, 1H), 6.95 – 6.89 (m, 3H), 5.11 (s, 1H), 5.00 (d, *J* = 17.6 Hz, 1H), 4.64 (d, *J* = 17.6 Hz, 1H), 3.68 (d, *J* = 15.9 Hz, 1H), 3.41 (d, *J* = 15.9 Hz, 1H), 2.39 (s, 6H), 2.28 (s, 6H). <sup>13</sup>C NMR (101 MHz, CDCl<sub>3</sub>) δ 196.83, 157.18, 154.69, 140.10, 138.60, 138.30, 137.07, 135.40, 134.97, 134.48, 132.36, 131.78, 130.96, 128.21, 126.02, 122.61, 119.73, 86.20, 45.72, 45.16, 21.42, 21.37. **HRMS (ESI)** *m/z* calcd. for C<sub>24</sub>H<sub>26</sub>N<sub>2</sub>O<sub>4</sub> [M+Na]<sup>+</sup> 477.1791; Found 477.1794.

5-(3-fluoro-4-methylphenyl)-10-(2-(3-fluoro-4-methylphenyl)-2-oxoethyl)-5-hydroxy-5,6-dihydro-3H-[1,2,4]oxadiazolo[3,4-a]isoquinolin-3-one (**5j**)

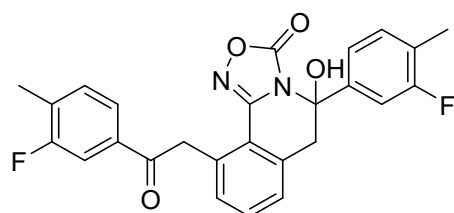

Following the general procedure B, the product **5j** was obtained in 76% yield (70.2 mg, 0.20 mmol) as a

yellow solid after column chromatography (eluent = PE/EA 4:1, v/v). Rf (PE/EA 4:1): 0.27. <sup>1</sup>H NMR (400 MHz, CDCl<sub>3</sub>) δ 7.75 (d, *J* = 7.7 Hz, 1H), 7.66 (d, *J* = 10.2 Hz, 1H), 7.42 (t, *J* = 7.6 Hz, 1H), 7.32 (t, *J* = 7.6 Hz, 1H), 7.21 (d, *J* = 7.5 Hz, 1H), 7.17 – 7.10 (m, 2H), 7.04 (dd, *J* = 10.5, 1.0 Hz, 1H), 6.93 (d, *J* = 7.7 Hz, 1H), 4.88 (d, *J* = 17.6 Hz, 1H), 4.67 (d, *J* = 17.6 Hz, 1H), 3.67 (d, *J* = 16.0 Hz, 1H), 3.40 (d, *J* = 16.0 Hz, 1H), 2.36 (d, *J* = 0.8 Hz, 3H), 2.22 (d, *J* = 0.8 Hz, 3H). <sup>13</sup>C NMR (101 MHz, CDCl<sub>3</sub>) δ 195.41, 161.33 (d, *J* = 246.2 Hz), 161.28 (d, *J* = 246.5 Hz), 156.92, 154.33, 139.80 (d, *J* = 6.4 Hz), 136.54 (d, *J* = 6.3 Hz), 134.97, 134.23, 132.57, 132.01, 131.98, 131.72 (d, *J* = 4.8 Hz), 131.14 (d, *J* = 17.4 Hz), 128.34, 126.19 (d, *J* = 17.6 Hz), 123.88 (d, *J* = 3.2 Hz), 120.17, 119.47, 114.64 (d, *J* = 23.3 Hz), 112.04 (d, *J* = 24.4 Hz), 85.48, 45.55, 45.12, 14.95 (d, *J* = 3.4 Hz), 14.31 (d, *J* = 3.3 Hz). <sup>19</sup>F NMR (376 MHz, CDCl<sub>3</sub>) δ -115.38, -116.09. **HRMS (ESI)** *m/z* calcd. for C<sub>26</sub>H<sub>20</sub>F<sub>2</sub>N<sub>2</sub>O<sub>4</sub> [M+H]<sup>+</sup> 463.1469; Found 463.1470.

3-(2-bromo-6-(2-oxo-2-phenylethyl)phenyl)-1,2,4-oxadiazol-5(4H)-one (**5k**)

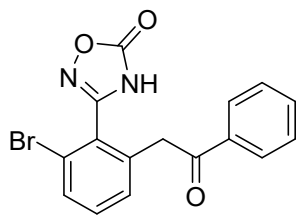

Following the general procedure B, the product **5k** was obtained in 73% yield (52.3 mg, 0.20 mmol) as a yellow solid after column chromatography (eluent = PE/EA 4:1, v/v). Rf (PE/EA 4:1): 0.20. <sup>1</sup>H NMR (400 MHz, CDCl<sub>3</sub>) δ 7.55 (dd, *J* = 8.3, 1.1 Hz, 2H), 7.29 – 7.20 (m, 2H), 7.10 (t, *J* = 7.7 Hz, 2H), 7.01 (t, *J* = 7.9 Hz, 1H), 6.91 (d, *J* = 7.8 Hz, 1H), 4.11 (s, 2H). <sup>13</sup>C NMR (101 MHz, CDCl<sub>3</sub>) δ 200.95, 164.20, 160.66, 141.67, 139.75, 137.94, 136.63, 135.93, 134.34, 132.83, 132.17, 129.96, 127.58, 47.29. **HRMS (ESI)** *m/z* calcd. for C<sub>16</sub>H<sub>11</sub>BrN<sub>2</sub>O<sub>3</sub> [M+Na]<sup>+</sup> 380.9851; Found 380.9848.

## 6. Gram-scale experiment

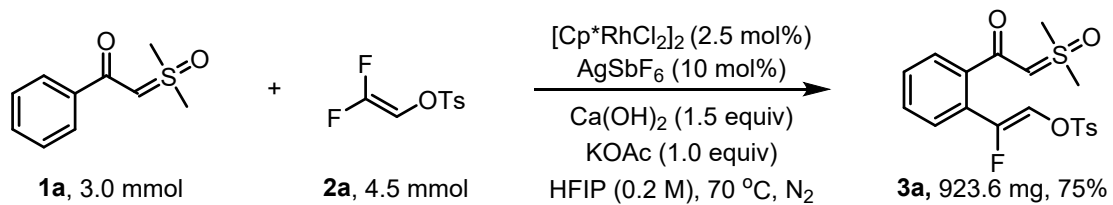

In an oven-dried Schlenk tube under air, a mixture of the substrate **1a** (3.0 mmol, 1.0 equiv), 2,2-difluorovinyl tosylate **2a** (6.0 mmol, 2.0 equiv),  $[\text{Cp}^*\text{RhCl}_2]_2$  (0.075 mmol, 2.5 mol%),  $\text{AgSbF}_6$  (0.3 mmol, 10 mol%),  $\text{Ca(OH)}_2$  (4.5 mmol, 1.5 equiv) and HFIP (0.20 M) was stirred at 70 °C for 8 h. Then the reaction mixture was purified by flash column chromatography on silica with an appropriate solvent to afford the pure product (EA : PE = 1:1) to give **3a** (923.6 mg, 75%).

## 7. Synthetic application of the product 3a

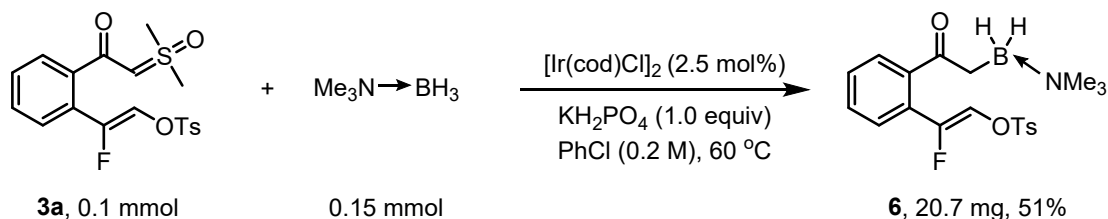

In an oven-dried Schlenk tube under air, a mixture of the substrate **3a** (0.1 mmol, 1.0 equiv), trimethylamine-borane (10.9 mg, 0.15 mmol, 1.5 equiv),  $[\text{Ir}(\text{Cod})\text{Cl}]_2$  (1.7 mg, 0.0025 mmol, 2.5 mol%),  $\text{KH}_2\text{PO}_4$  (13.6 mg, 0.1 mmol, 1.0 equiv), and  $\text{PhCl}$  (0.5 mL) was stirred at 60 °C for 6h. The reaction mixture was then diluted with DCM (10.0 mL) and washed with  $\text{H}_2\text{O}$ . The aqueous phase was extracted with DCM again. The organic layers were combined, washed with brine and dried over  $\text{Na}_2\text{SO}_4$ . The pure product was purified by flash column chromatography on silica with an appropriate solvent to afford the pure product **6**, 20.7 mg, 51%.  $^1\text{H}$  NMR (400 MHz,  $\text{CDCl}_3$ )  $\delta$  7.87 (d,  $J = 8.3$  Hz, 2H), 7.58 (d,  $J = 7.5$  Hz, 1H), 7.42 (t,  $J = 7.5$  Hz, 1H), 7.39 – 7.33 (m, 3H), 7.25 (d,  $J = 7.3$  Hz, 1H), 6.46 (d,  $J = 18.3$  Hz, 1H), 2.59 (s, 2H), 2.56 (s, 9H), 2.44 (s, 3H), 2.29 (s, 2H).  $^{13}\text{C}$  NMR (101 MHz,  $\text{CDCl}_3$ )  $\delta$  210.39, 152.00 (d,  $J = 259.3$  Hz), 145.58, 141.55, 132.26, 129.99, 129.63, 129.00 (d,  $J = 4.1$  Hz), 128.75, 128.24, 127.12, 126.17 (d,  $J = 22.3$  Hz), 119.62 (d,  $J = 14.1$  Hz), 52.11, 49.62, 21.76.  $^{19}\text{F}$  NMR (376 MHz,  $\text{CDCl}_3$ )  $\delta$  -111.30. **HRMS (ESI)**  $m/z$  calcd. for  $\text{C}_{23}\text{H}_{22}\text{FO}_5\text{S}_2$   $[\text{M}+\text{H}]^+$  406.1659; Found 406.1662.

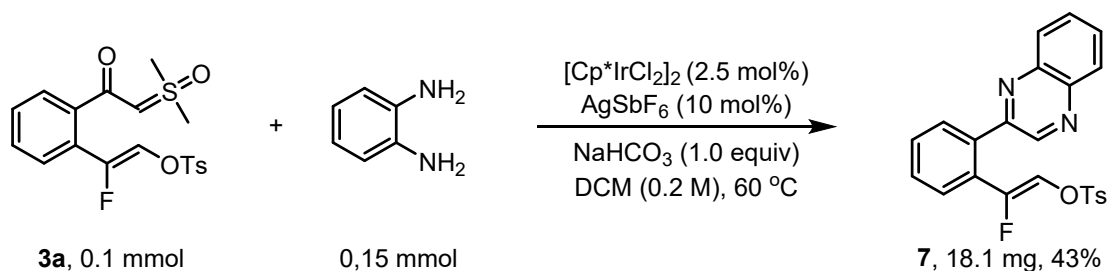

In an oven-dried Schlenk tube under air, a mixture of the substrate **3a** (0.1 mmol, 1.0 equiv), benzene-1,2-diamine (10.8 mg, 0.15 mmol, 1.5 equiv),  $(\text{Cp}^*\text{IrCl}_2)_2$  (2.0 mg, 0.0025 mmol, 2.5 mol%),  $\text{AgSbF}_6$  (3.4 mg, 0.01 mmol, 10.0 mol%),  $\text{NaHCO}_3$  (8.4 mg, 0.1 mmol, 1.0 equiv), and DCM (0.5 mL, 0.2 M) was stirred at 60 °C in the oil bath for 12 h. The reaction mixture was then diluted with DCM (10.0 mL) and washed with  $\text{H}_2\text{O}$ . The aqueous phase was extracted with

DCM again. The organic layers were combined, washed with brine and dried over Na<sub>2</sub>SO<sub>4</sub>. The pure product was purified by flash column chromatography on silica with an appropriate solvent to afford the pure product **7**, 18.1 mg, 43%, <sup>1</sup>H NMR (400 MHz, CDCl<sub>3</sub>) δ 7.87 (d, *J* = 8.3 Hz, 2H), 7.58 (d, *J* = 7.5 Hz, 1H), 7.42 (t, *J* = 7.5 Hz, 1H), 7.39 – 7.33 (m, 3H), 7.25 (d, *J* = 7.3 Hz, 1H), 6.46 (d, *J* = 18.3 Hz, 1H), 2.59 (s, 2H), 2.56 (s, 9H), 2.44 (s, 3H), 2.29 (s, 2H). <sup>13</sup>C NMR (101 MHz, CDCl<sub>3</sub>) δ 152.96, 151.27 (d, *J* = 259.1 Hz), 145.75, 144.83 (d, *J* = 2.3 Hz), 141.95, 141.37, 136.69, 131.99, 131.21, 130.97, 130.41, 130.13, 129.98, 129.66, 129.64, 129.59 (d, *J* = 4.0 Hz), 129.25, 128.03, 127.81, 120.95 (d, *J* = 13.8 Hz), 21.82. <sup>19</sup>F NMR (376 MHz, CDCl<sub>3</sub>) δ -113.25. **HRMS (ESI)** *m/z* calcd. for C<sub>23</sub>H<sub>18</sub>FN<sub>2</sub>O<sub>3</sub>S [M+H]<sup>+</sup> 421.1022; Found 421.1018.

## 8. Mechanistic studies

### (1) Reversibility of C–H bond cleavage without Rh catalyst of **1a**

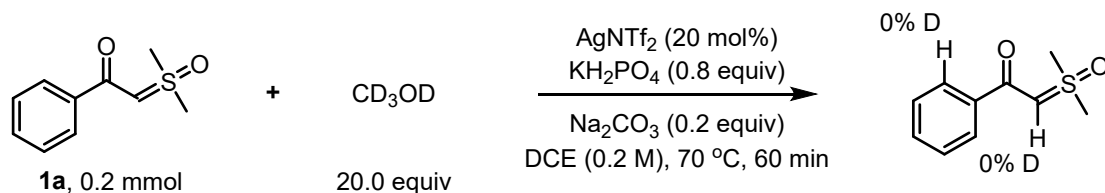

To a reaction tube equipped with a stir bar were charged with 2-(dimethyl(oxo)-λ<sup>6</sup>-sulfanylidene)-1-phenylethan-1-one (**1a**, 39.2 mg, 0.20 mmol), [Cp\*RhCl<sub>2</sub>]<sub>2</sub> (3.1 mg, 0.0050 mmol), AgNTf<sub>2</sub> (15.6 mg, 20 mol%), KH<sub>2</sub>PO<sub>4</sub> (21.8 mg, 0.16 mmol), Na<sub>2</sub>CO<sub>3</sub> (4.2 mg, 0.040 mmol) CD<sub>3</sub>OD (144 mg, 4.0 mmol) and DCE (1.0 mL). The resulting mixture was stirred at 70 °C for 60 min. Then it was cooled to room temperature, quenched with saturated brine (5.0 mL), and extracted with EtOAc (10 mL × 3). The combined organic layers were dried over anhydrous Na<sub>2</sub>SO<sub>4</sub>, and concentrated under reduced pressure. The residue was purified by silica gel chromatography using DCM/Mt (20:1) as eluent to afford **1a-dn**, which was characterized by <sup>1</sup>H NMR spectroscopy. <sup>1</sup>H NMR analysis of **1a** revealed no deuteration at the 2-position of phenyl ring or the α-position of the carbonyl.

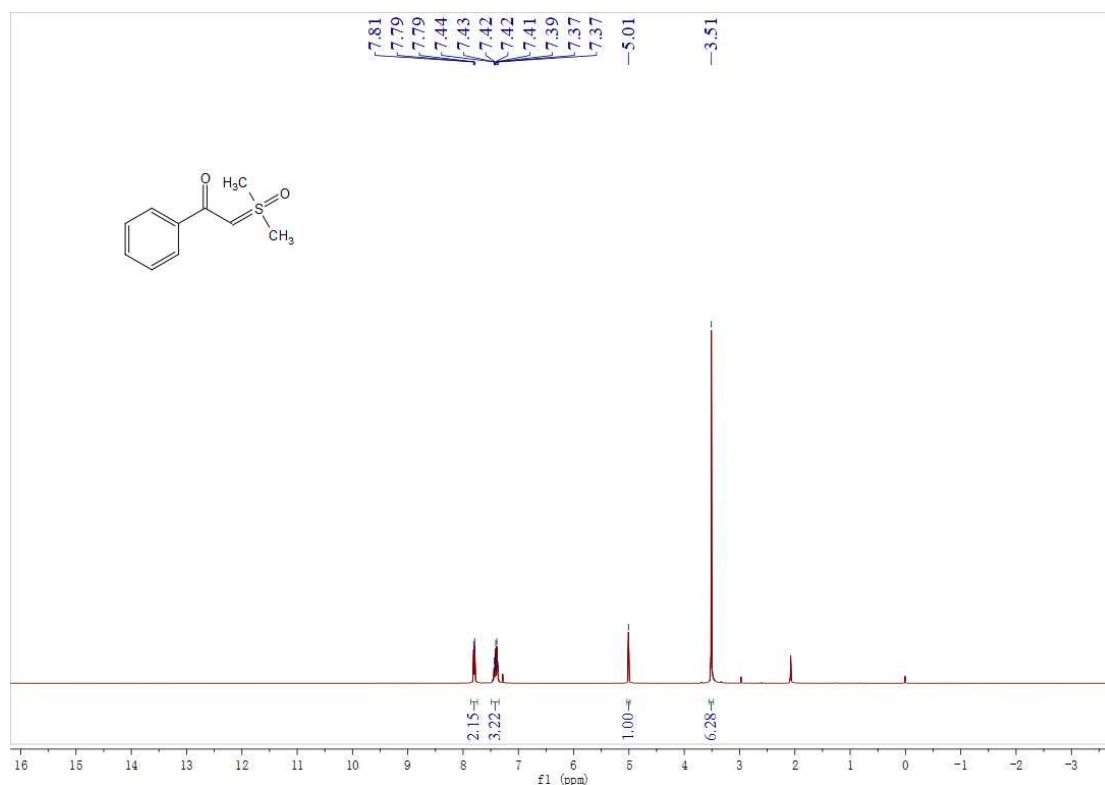

## (2) Reversibility of C–H bond cleavage with Rh catalyst of **1a**

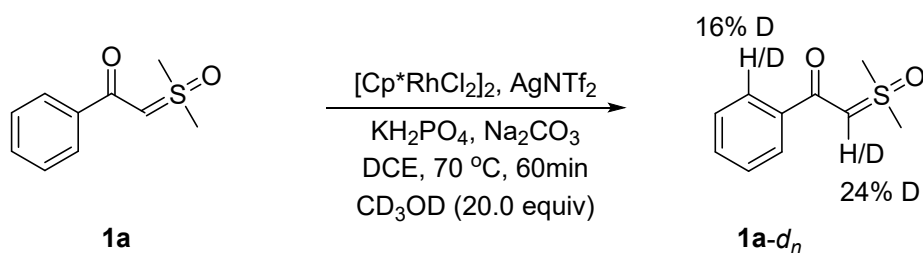

To a reaction tube equipped with a stir bar were charged with 2-(dimethyl(oxo)- $\lambda^6$ -sulfanylidene)-1-phenylethan-1-one (**1a**, 39.2 mg, 0.20 mmol),  $[\text{Cp}^*\text{RhCl}_2]_2$  (3.1 mg, 0.0050 mmol),  $\text{AgNTf}_2$  (15.6 mg, 20 mol%),  $\text{KH}_2\text{PO}_4$  (21.8 mg, 0.16 mmol),  $\text{Na}_2\text{CO}_3$  (4.2 mg, 0.040 mmol)  $\text{CD}_3\text{OD}$  (144 mg, 4.0 mmol) and DCE (1.0 mL). The resulting mixture was stirred at 70 °C for 60 min. Afterwards, it was cooled to room temperature, quenched with saturated brine (5.0 mL), and extracted with EtOAc (10 mL  $\times$  3). The combined organic layers were dried over anhydrous  $\text{Na}_2\text{SO}_4$ , and concentrated under reduced pressure. The residue was purified by silica gel chromatography using DCM/Mt (20:1) as eluent to afford **1a-d<sub>n</sub>**.  $^1\text{H}$  NMR analysis revealed 16% deuteration at the *ortho*-position of phenyl ring and 24% deuteration at the  $\alpha$ -position of the carbonyl unit.

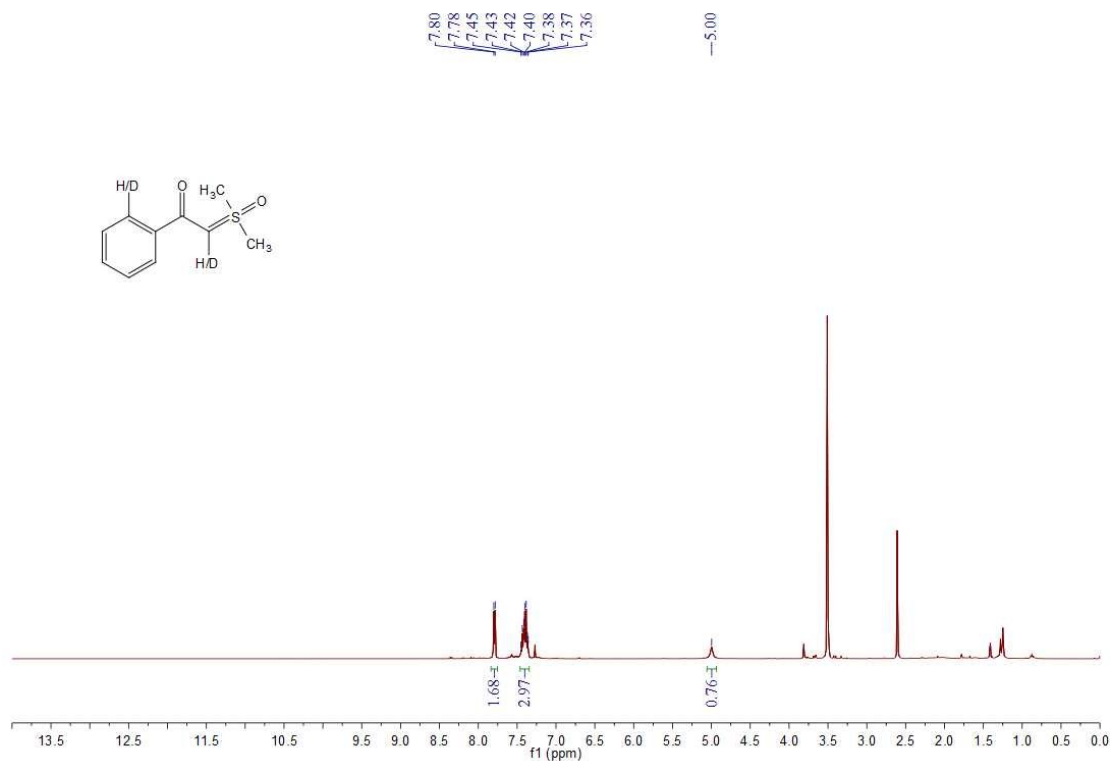



### (3) An intermolecular KIE experiment of **3a**

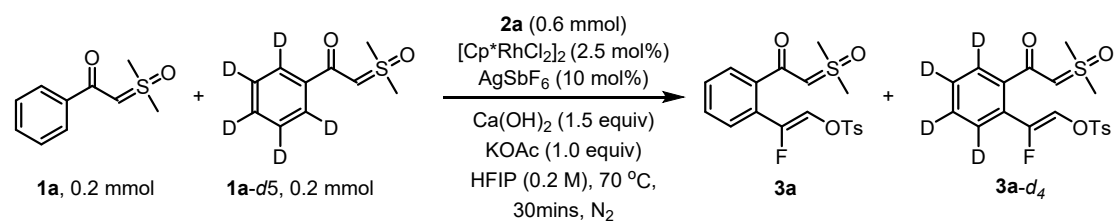

To a reaction tube equipped with a stir bar were added 2-(dimethyl(oxo)- $\lambda^6$ -sulfanylidene)-1-phenyl ethan-1-one (**1a**, 39.2 mg, 0.20 mmol), 2-(dimethyl(oxo)- $\lambda^6$ -sulfanylidene)-1-phenyl-*d*<sub>5</sub>-ethan-1-one (**1a-d<sub>5</sub>**, 40.2 mg, 0.20 mmol), 2,2-difluorovinyl tosylate (**2a**, 140.4mg, 0.60 mmol), [Cp\*RhCl<sub>2</sub>]<sub>2</sub> (6.2 mg, 0.001 mmol, 2.5 mol%), AgSbF<sub>6</sub> (13.72 mg, 0.04 mmol, 10 mol%), Ca(OH)<sub>2</sub> (44.4 mg, 0.60 mmol, 1.5 equiv), KOAc (39.2 mg, 0.40 mmol, 1.0 equiv) and HFIP (2 mL). The resulting mixture was then stirred at 70 °C for 30 min. Afterwards, cooled to room temperature, quenched with saturated brine (5.0 mL), and extracted with EtOAc (10 mL  $\times$  3). The combined organic layers were dried over anhydrous Na<sub>2</sub>SO<sub>4</sub>, and concentrated under reduced pressure. The residue was purified by silica gel chromatography using DCM/Mt (20:1) as eluent to afford a mixture of **3a** and **3a-d<sub>4</sub>**. Upon analyzing the corresponding <sup>1</sup>H NMR spectrum, the intermolecular *KIE* ( $K_H/K_D$ ) was determined as 2.3 (0.7/0.3).

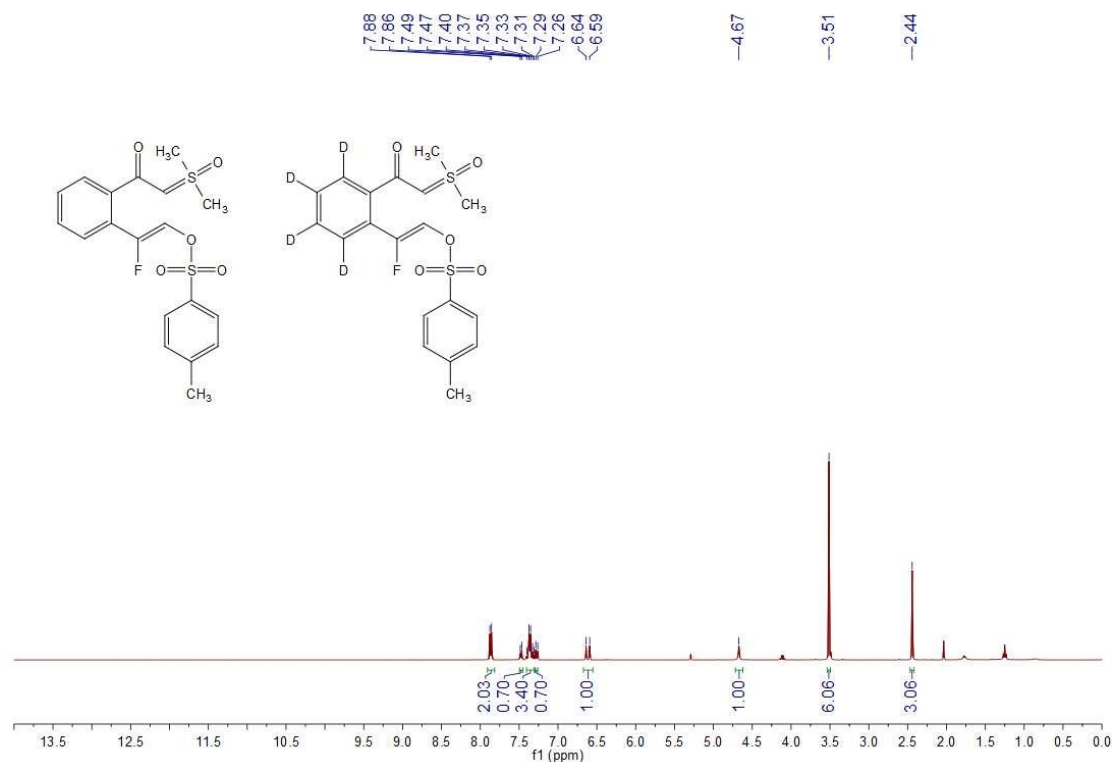

#### (4) Reversibility of C–H bond cleavage with Rh catalyst of **4f**

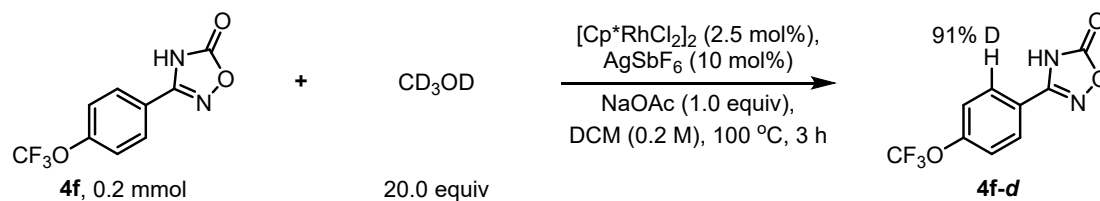

To a reaction tube equipped with a stir bar were charged with **4f**, 49.2 mg, 0.20 mmol),  $[\text{Cp}^*\text{RhCl}_2]_2$  (3.1 mg, 0.0050 mmol),  $\text{AgSbF}_6$  (6.8 mg, 10 mol%),  $\text{NaOAc}$  (16.4 mg, 0.2 mmol),  $\text{CD}_3\text{OD}$  (144.3 mg, 4.0 mmol) and  $\text{DCM}$  (1.0 mL). The resulting mixture was stirred at  $100\text{ }^\circ\text{C}$  for 3 h. Then cooled to room temperature, quenched with saturated brine (5.0 mL), and extracted with  $\text{EtOAc}$  (10 mL  $\times$  3). The combined organic layers were dried over anhydrous  $\text{Na}_2\text{SO}_4$ , and concentrated under reduced pressure. The residue was purified by silica gel chromatography using  $\text{PE/EA}$  (2:1) as eluent to afford **4f-d**.  $^1\text{H}$  NMR analysis revealed 91% deuteration at the *ortho*-position of phenyl ring based on the double doublet at  $\delta$ : 7.86.

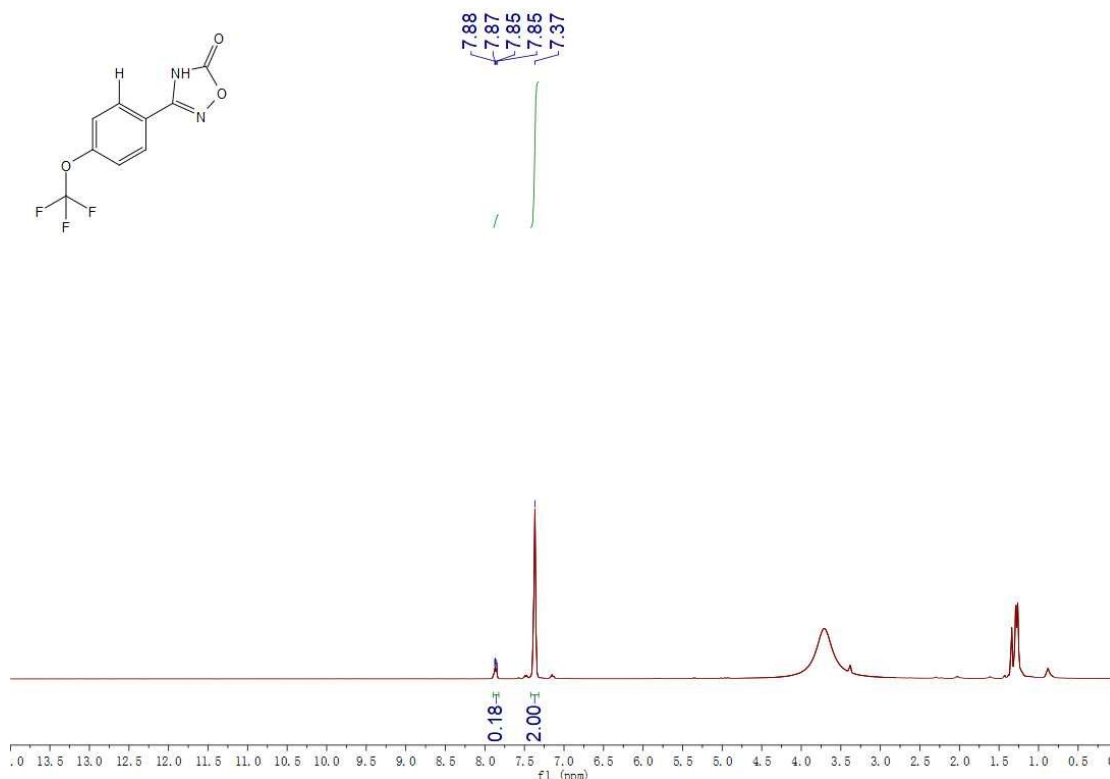

#### (5) Synthesis of Rh catalyst **8**

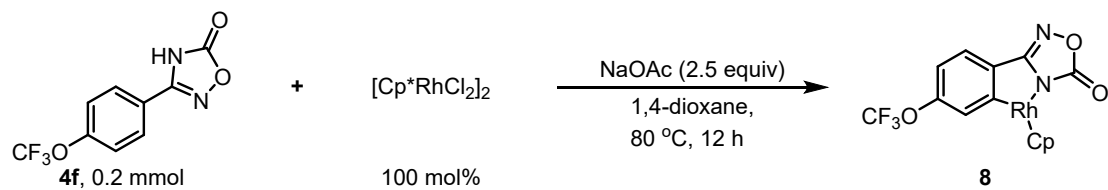

According to the reported method<sup>7</sup>, in an oven-dried Schlenk tube under air, a mixture of the substrates **4f** (0.2 mmol, 1.0 equiv), [Cp\*RhCl<sub>2</sub>]<sub>2</sub> (1.0 equiv), NaOAc (2.5 equiv), 1,4-dioxane (3 ml) was stirred at 80 °C for 12 h. The obtained yellow solution was cooled to room temperature, and then separated centrifugally. The solid was washed by 1,4-dioxane three times, dried to give **8**, yellow solid, yield 85%.

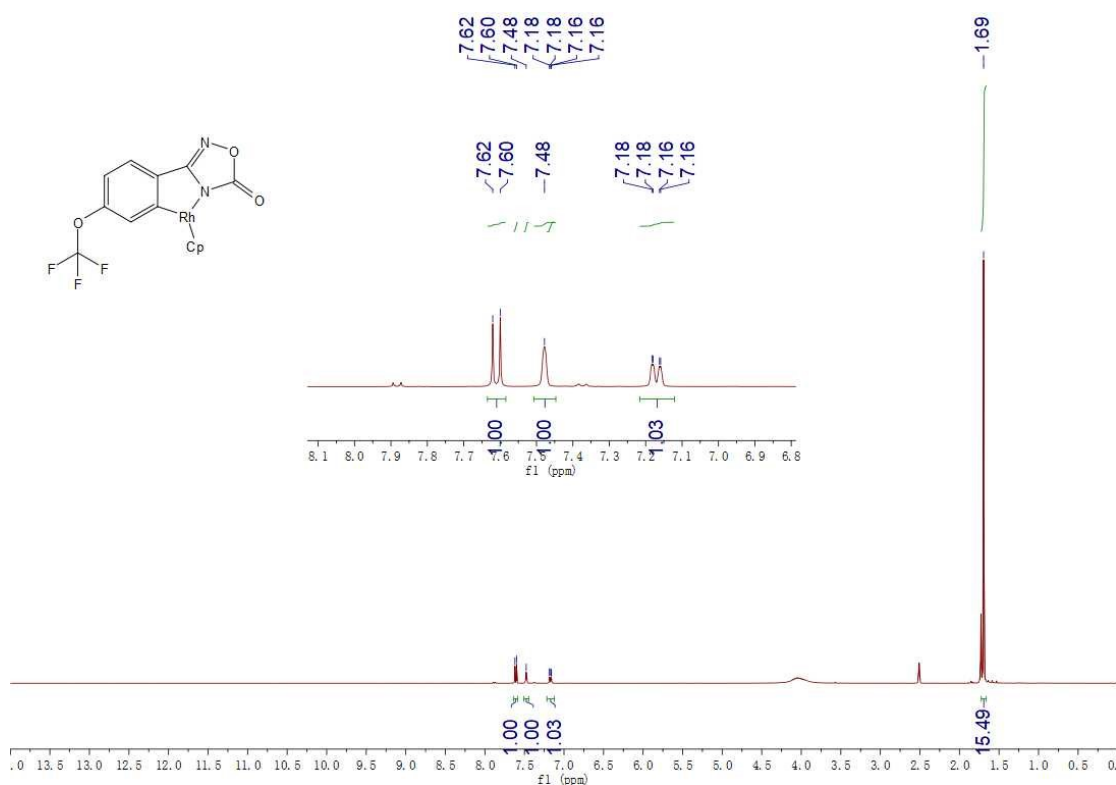

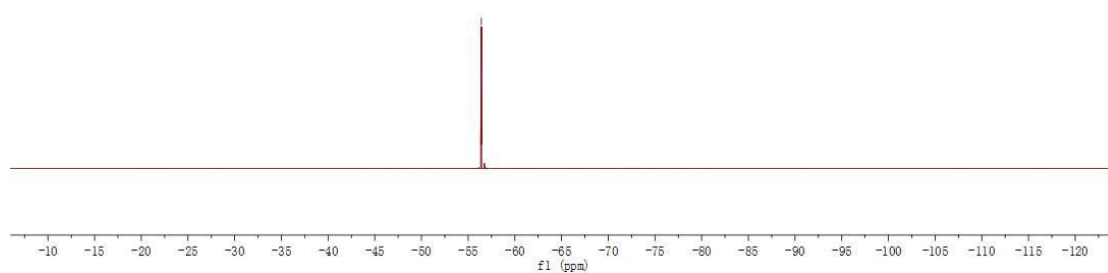

### (5) Synthesis of **5h** with Rh catalyst **8**

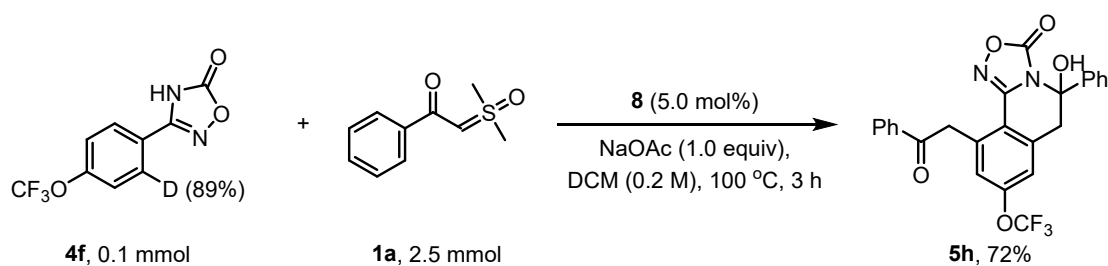

In an oven-dried Schlenk tube under air, a mixture of the substrates **4f** (0.1 mmol, 1.0 equiv), **1a** (0.25 mmol, 2.5 equiv), **8** (5.0 mol%), NaOAc (1.0 equiv), and DCM (0.2 M) was stirred at 100 °C for 3 h. Then the reaction mixture was purified by flash column chromatography on silica with an appropriate solvent to afford the pure product **5h** (72%).

## 9. Scheme S1 Mechanistic Proposal of 3a

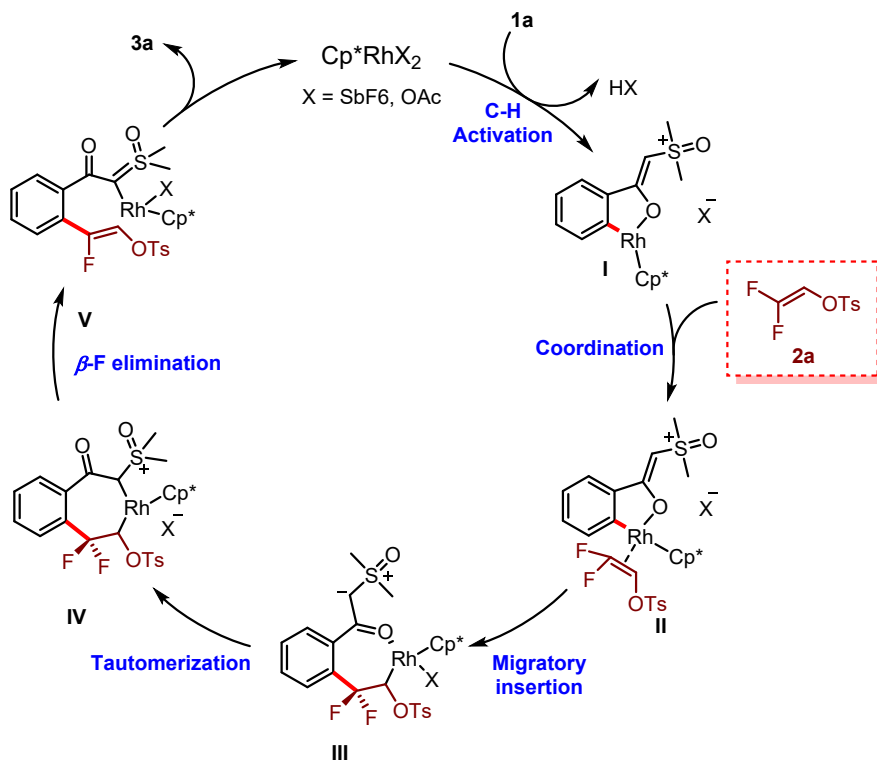

## 10. Scheme S2 Mechanistic Proposal of 5a

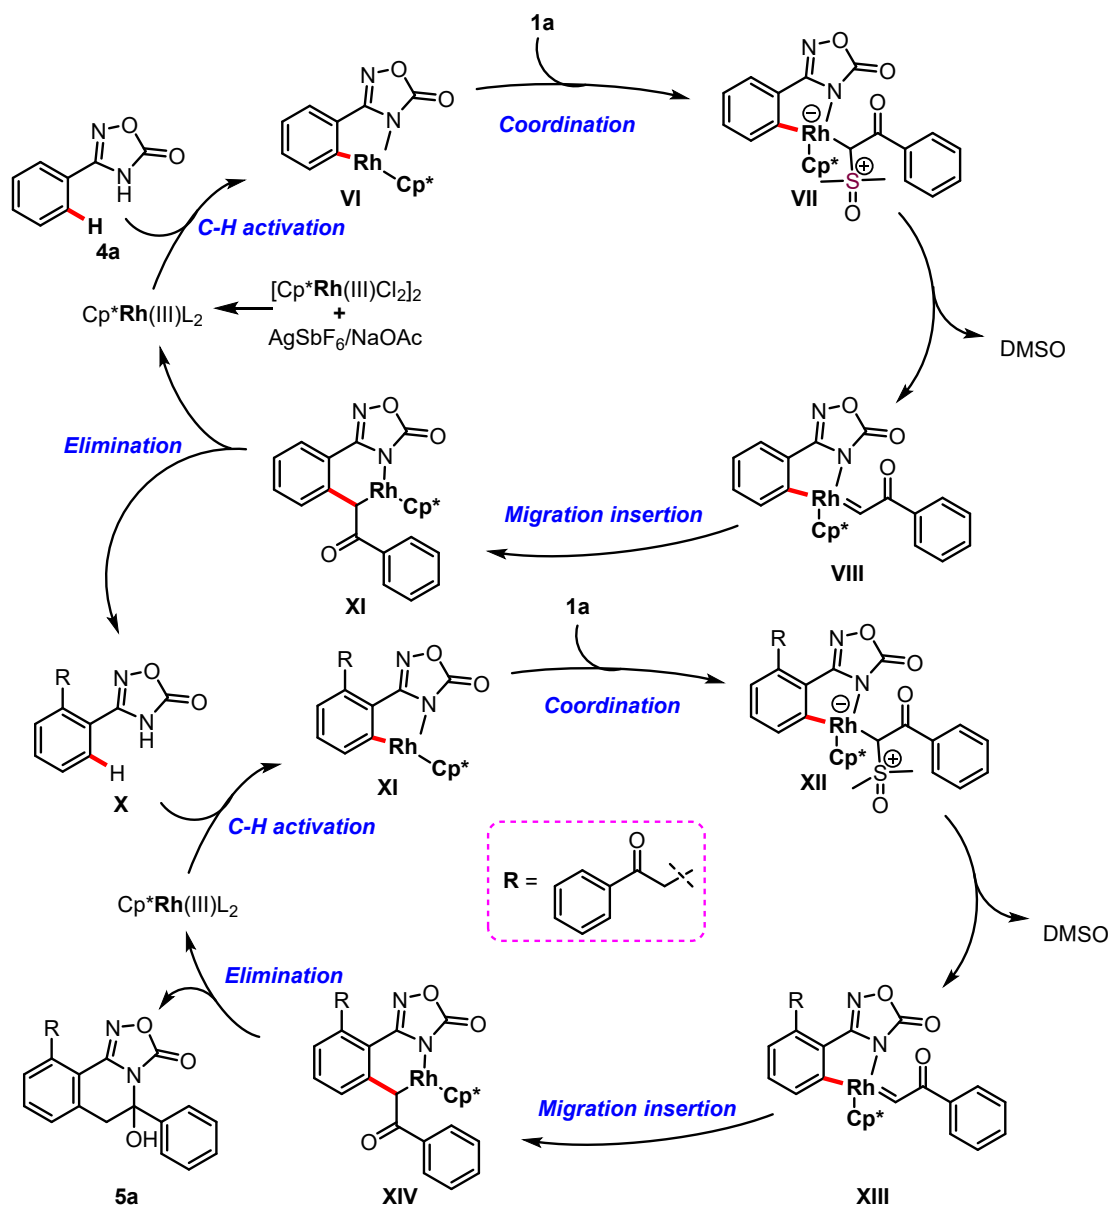

## 11. X-Ray crystal data for compound **5g**

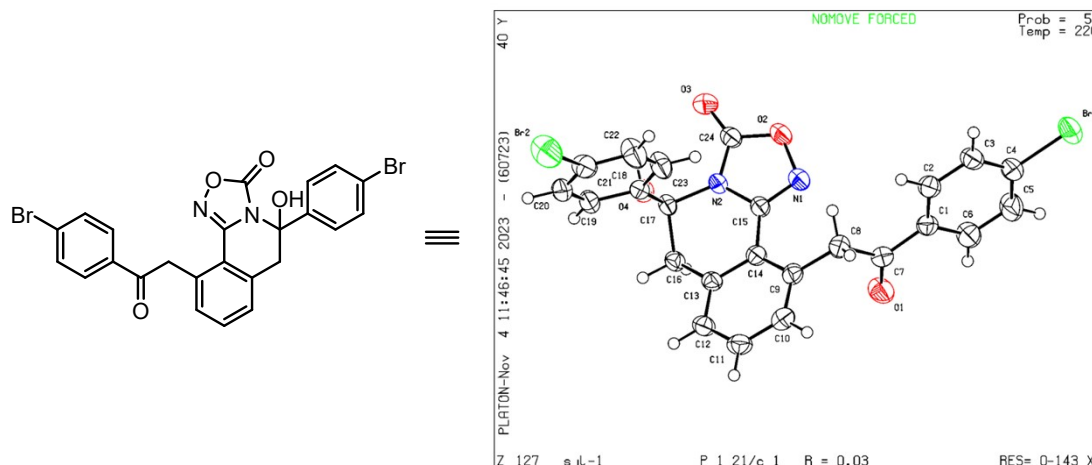

X-ray-quality crystal was obtained by slow diffusion of Petroleum ether into a dilute dichloromethane solution of **5g** at room temperature under air. Thermal ellipsoids drawn at the 50% probability level. Crystal data were obtained on a SuperNova, Dual, Cu at zero, AtlasS2 diffractometer using Mo K $\alpha$  radiation ( $\lambda = 0.71073$  Å). The crystal was kept at 200.00(10) K during data collection.

**Table 1** Crystal data and structure refinement for **5g**.

|                                        |                                                                               |
|----------------------------------------|-------------------------------------------------------------------------------|
| Identification code                    | <b>5g</b>                                                                     |
| Empirical formula                      | C <sub>24</sub> H <sub>16</sub> Br <sub>2</sub> N <sub>2</sub> O <sub>4</sub> |
| Formula weight                         | 556.21                                                                        |
| Temperature/K                          | 220.00(10)                                                                    |
| Crystal system                         | monoclinic                                                                    |
| Space group                            | P2 <sub>1</sub> /c                                                            |
| a/Å                                    | 13.02870(10)                                                                  |
| b/Å                                    | 20.8713(2)                                                                    |
| c/Å                                    | 8.81380(10)                                                                   |
| $\alpha$ /°                            | 90                                                                            |
| $\beta$ /°                             | 102.2430(10)                                                                  |
| $\gamma$ /°                            | 90                                                                            |
| Volume/Å <sup>3</sup>                  | 2342.19(4)                                                                    |
| Z                                      | 4                                                                             |
| $\rho_{\text{calc}}$ /cm <sup>3</sup>  | 1.577                                                                         |
| $\mu$ /mm <sup>-1</sup>                | 4.667                                                                         |
| F(000)                                 | 1104.0                                                                        |
| Crystal size/mm <sup>3</sup>           | 0.15 × 0.12 × 0.11                                                            |
| Radiation                              | Cu K $\alpha$ ( $\lambda = 1.54184$ )                                         |
| 2 $\theta$ range for data collection/° | 8.134 to 148.604                                                              |
| Index ranges                           | -13 ≤ h ≤ 16, -25 ≤ k ≤ 25, -9 ≤ l ≤ 10                                       |
| Reflections collected                  | 12255                                                                         |
| Independent reflections                | 4631 [R <sub>int</sub> = 0.0227, R <sub>sigma</sub> = 0.0211]                 |
| Data/restraints/parameters             | 4631/0/291                                                                    |
| Goodness-of-fit on F <sup>2</sup>      | 1.021                                                                         |
| Final R indexes [I ≥ 2 $\sigma$ (I)]   | R <sub>1</sub> = 0.0348, wR <sub>2</sub> = 0.0970                             |

Final R indexes [all data]  $R_1 = 0.0368$ ,  $wR_2 = 0.0987$   
 Largest diff. peak/hole / e  $\text{\AA}^{-3}$  0.51/-0.61

### Crystal structure determination of [5g]

**Crystal Data** for  $C_{24}H_{16}Br_2N_2O_4$  ( $M = 556.21$  g/mol): monoclinic, space group  $P2_1/c$  (no. 14),  $a = 13.02870(10)$   $\text{\AA}$ ,  $b = 20.8713(2)$   $\text{\AA}$ ,  $c = 8.81380(10)$   $\text{\AA}$ ,  $\beta = 102.2430(10)^\circ$ ,  $V = 2342.19(4)$   $\text{\AA}^3$ ,  $Z = 4$ ,  $T = 220.00(10)$  K,  $\mu(\text{Cu K}\alpha) = 4.667$   $\text{mm}^{-1}$ ,  $D_{\text{calc}} = 1.577$   $\text{g/cm}^3$ , 12255 reflections measured ( $8.134^\circ \leq 2\Theta \leq 148.604^\circ$ ), 4631 unique ( $R_{\text{int}} = 0.0227$ ,  $R_{\text{sigma}} = 0.0211$ ) which were used in all calculations. The final  $R_1$  was 0.0348 ( $I > 2\sigma(I)$ ) and  $wR_2$  was 0.0987 (all data).

**Table 2 Fractional Atomic Coordinates ( $\times 10^4$ ) and Equivalent Isotropic Displacement Parameters ( $\text{\AA}^2 \times 10^3$ ) for 5g.  $U_{\text{eq}}$  is defined as 1/3 of the trace of the orthogonalised  $U_{\text{ij}}$  tensor.**

| Atom | x          | y          | z           | U(eq)     |
|------|------------|------------|-------------|-----------|
| Br1  | 1358.4(2)  | 3363.0(2)  | -2777.9(4)  | 60.99(13) |
| Br2  | 9668.4(3)  | 6575.5(2)  | 8063.3(5)   | 78.54(15) |
| O1   | 5344.6(14) | 2401.4(8)  | 3176(2)     | 52.9(4)   |
| O2   | 4305.3(12) | 4322.9(8)  | 6039.2(18)  | 43.7(4)   |
| O3   | 4680.3(12) | 4900.4(8)  | 8269.3(19)  | 44.5(4)   |
| O4   | 6516.9(12) | 4283.5(7)  | 10162.8(16) | 37.9(3)   |
| N1   | 4884.1(14) | 3903.1(9)  | 5224(2)     | 41.5(4)   |
| N2   | 5877.8(12) | 4218.0(8)  | 7460.0(18)  | 30.6(3)   |
| C1   | 4266.1(16) | 3037.6(10) | 1253(2)     | 35.2(4)   |
| C2   | 4098.4(17) | 3625.4(11) | 487(3)      | 40.7(5)   |
| C3   | 3233.4(17) | 3719.3(11) | -715(3)     | 42.4(5)   |
| C4   | 2541.6(17) | 3222.6(12) | -1130(3)    | 43.2(5)   |
| C5   | 2678(2)    | 2636.5(13) | -395(3)     | 56.4(7)   |
| C6   | 3547(2)    | 2546.9(12) | 797(3)      | 49.5(6)   |
| C7   | 5203.0(16) | 2916.3(10) | 2524(2)     | 34.8(4)   |
| C8   | 5995.7(18) | 3456.3(10) | 2903(2)     | 36.6(4)   |
| C9   | 6838.9(17) | 3350.2(9)  | 4330(2)     | 33.6(4)   |
| C10  | 7792.4(18) | 3086.6(11) | 4178(3)     | 40.7(5)   |
| C11  | 8611.8(18) | 3006.7(11) | 5445(3)     | 42.6(5)   |
| C12  | 8505.2(17) | 3192.7(10) | 6915(3)     | 37.4(4)   |
| C13  | 7565.5(16) | 3455.8(9)  | 7115(2)     | 31.4(4)   |
| C14  | 6736.8(16) | 3535.2(9)  | 5823(2)     | 31.5(4)   |
| C15  | 5807.2(15) | 3865.8(9)  | 6118(2)     | 31.3(4)   |
| C16  | 7408.7(16) | 3634.6(10) | 8706(2)     | 32.8(4)   |
| C17  | 6820.7(15) | 4268.2(10) | 8734(2)     | 30.7(4)   |
| C18  | 7476.7(15) | 4850.1(9)  | 8515(2)     | 31.2(4)   |
| C19  | 8317.8(17) | 5006.4(11) | 9718(3)     | 39.1(5)   |
| C20  | 8960.7(17) | 5522.5(11) | 9584(3)     | 44.2(5)   |
| C21  | 8766.6(19) | 5878.8(11) | 8247(3)     | 47.6(6)   |
| C22  | 7928(2)    | 5740.5(13) | 7049(3)     | 57.7(7)   |
| C23  | 7294.2(19) | 5224.8(12) | 7188(3)     | 46.8(6)   |
| C24  | 4942.2(16) | 4522.3(10) | 7380(2)     | 35.5(4)   |



**Table 3 Anisotropic Displacement Parameters ( $\text{\AA}^2 \times 10^3$ ) for 5g. The Anisotropic displacement factor exponent takes the form:  $-2\pi^2[h^2a^{*2}U_{11}+2hka^*b^*U_{12}+\dots]$ .**

| Atom | $U_{11}$  | $U_{22}$ | $U_{33}$ | $U_{23}$  | $U_{13}$   | $U_{12}$   |
|------|-----------|----------|----------|-----------|------------|------------|
| Br1  | 40.39(17) | 60.9(2)  | 70.8(2)  | -3.24(13) | -12.64(13) | 0.50(11)   |
| Br2  | 56.9(2)   | 48.5(2)  | 119.0(3) | 19.57(16) | -6.51(19)  | -22.38(13) |
| O1   | 48.2(10)  | 37.1(9)  | 66.6(11) | 11.8(8)   | -2.9(8)    | -4.2(7)    |
| O2   | 29.9(7)   | 54.2(10) | 42.9(8)  | -4.0(7)   | -1.4(6)    | 9.7(7)     |
| O3   | 40.4(8)   | 44.2(9)  | 49.0(9)  | -3.2(7)   | 9.8(7)     | 10.0(7)    |
| O4   | 39.2(8)   | 43.3(8)  | 31.6(7)  | 2.7(6)    | 8.7(6)     | 2.8(6)     |
| N1   | 33.6(9)   | 47.9(11) | 39.7(9)  | -4.4(8)   | 0.4(7)     | 7.1(8)     |
| N2   | 24.3(8)   | 33.0(8)  | 32.3(8)  | -0.5(6)   | 1.1(6)     | 0.7(6)     |
| C1   | 32.7(10)  | 33.5(10) | 39.4(10) | -1.7(8)   | 7.6(8)     | 1.5(8)     |
| C2   | 34.7(11)  | 33.3(11) | 51.7(13) | 0.1(9)    | 3.7(9)     | -1.9(8)    |
| C3   | 34.0(11)  | 37.5(11) | 52.9(13) | 2.9(9)    | 3.2(9)     | 1.6(9)     |
| C4   | 30.9(11)  | 45.2(12) | 50.7(12) | -4.4(10)  | 2.5(9)     | 1.5(9)     |
| C5   | 47.9(14)  | 42.8(13) | 70.3(16) | 0.0(12)   | -6.1(12)   | -13.7(11)  |
| C6   | 46.3(13)  | 36.0(12) | 61.3(14) | 6.0(10)   | 0.0(11)    | -7.3(10)   |
| C7   | 35.7(11)  | 32.7(10) | 37.0(10) | -0.9(8)   | 9.8(8)     | 2.5(8)     |
| C8   | 41.6(11)  | 33.9(11) | 33.2(10) | 0.0(8)    | 5.9(9)     | -2.7(8)    |
| C9   | 36.7(11)  | 27.1(9)  | 36.0(10) | 0.4(7)    | 5.5(8)     | -2.9(8)    |
| C10  | 43.9(12)  | 36.2(11) | 43.5(11) | -5.0(9)   | 12.7(9)    | -0.2(9)    |
| C11  | 34.8(11)  | 38.3(11) | 55.7(13) | -1.7(10)  | 11.6(9)    | 6.2(9)     |
| C12  | 32.2(10)  | 33.5(10) | 44.5(11) | 3.4(9)    | 3.7(8)     | 3.5(8)     |
| C13  | 29.5(10)  | 24.8(9)  | 38.3(10) | 3.4(7)    | 3.5(8)     | 0.0(7)     |
| C14  | 30.4(10)  | 27.4(9)  | 35.8(10) | 1.2(7)    | 5.1(8)     | -1.5(7)    |
| C15  | 29.4(9)   | 31.2(10) | 31.2(9)  | 2.3(7)    | 2.1(7)     | -0.3(8)    |
| C16  | 33.2(10)  | 30.1(10) | 32.6(9)  | 4.2(7)    | 1.4(8)     | 1.6(8)     |
| C17  | 27.4(9)   | 34.2(10) | 28.0(9)  | 2.0(7)    | -0.1(7)    | -0.2(8)    |
| C18  | 28.3(9)   | 29.5(9)  | 34.1(9)  | -0.8(7)   | 3.0(7)     | 2.4(7)     |
| C19  | 34.8(11)  | 40.7(11) | 37.5(10) | 1.1(9)    | -1.8(8)    | 0.2(9)     |
| C20  | 32.8(11)  | 39.6(12) | 54.5(13) | -7.3(10)  | -3.4(9)    | -1.2(9)    |
| C21  | 37.0(11)  | 32.1(11) | 70.1(15) | 4.6(10)   | 3.1(11)    | -5.6(9)    |
| C22  | 54.1(15)  | 48.2(14) | 61.7(15) | 21.3(12)  | -8.3(12)   | -13.6(12)  |
| C23  | 42.4(12)  | 45.1(13) | 45.5(12) | 11.2(10)  | -7.2(10)   | -8.1(10)   |
| C24  | 29.4(10)  | 37.4(11) | 38.0(10) | 2.4(8)    | 3.2(8)     | 3.0(8)     |

**Table 4 Bond Lengths for 5g.**

| Atom | Atom | Length/ $\text{\AA}$ | Atom | Atom | Length/ $\text{\AA}$ |
|------|------|----------------------|------|------|----------------------|
| Br1  | C4   | 1.903(2)             | C7   | C8   | 1.517(3)             |
| Br2  | C21  | 1.898(2)             | C8   | C9   | 1.500(3)             |
| O1   | C7   | 1.214(3)             | C9   | C10  | 1.391(3)             |
| O2   | N1   | 1.443(2)             | C9   | C14  | 1.405(3)             |
| O2   | C24  | 1.358(3)             | C10  | C11  | 1.382(3)             |
| O3   | C24  | 1.211(3)             | C11  | C12  | 1.387(3)             |
| O4   | C17  | 1.398(2)             | C12  | C13  | 1.387(3)             |
| N1   | C15  | 1.293(3)             | C13  | C14  | 1.403(3)             |
| N2   | C15  | 1.379(3)             | C13  | C16  | 1.506(3)             |
| N2   | C17  | 1.482(2)             | C14  | C15  | 1.464(3)             |
| N2   | C24  | 1.363(3)             | C16  | C17  | 1.531(3)             |

**Table 4 Bond Lengths for 5g.**

| Atom | Atom | Length/Å | Atom | Atom | Length/Å |
|------|------|----------|------|------|----------|
| C1   | C2   | 1.395(3) | C17  | C18  | 1.521(3) |
| C1   | C6   | 1.389(3) | C18  | C19  | 1.393(3) |
| C1   | C7   | 1.493(3) | C18  | C23  | 1.385(3) |
| C2   | C3   | 1.387(3) | C19  | C20  | 1.385(3) |
| C3   | C4   | 1.371(3) | C20  | C21  | 1.370(4) |
| C4   | C5   | 1.378(4) | C21  | C22  | 1.380(3) |
| C5   | C6   | 1.385(3) | C22  | C23  | 1.378(3) |

**Table 5 Bond Angles for 5g.**

| Atom | Atom | Atom | Angle/°    | Atom | Atom | Atom | Angle/°    |
|------|------|------|------------|------|------|------|------------|
| C24  | O2   | N1   | 109.41(15) | C14  | C13  | C16  | 119.57(18) |
| C15  | N1   | O2   | 104.47(16) | C9   | C14  | C15  | 122.82(18) |
| C15  | N2   | C17  | 125.55(16) | C13  | C14  | C9   | 121.23(19) |
| C24  | N2   | C15  | 107.93(16) | C13  | C14  | C15  | 115.77(18) |
| C24  | N2   | C17  | 126.49(17) | N1   | C15  | N2   | 112.02(18) |
| C2   | C1   | C7   | 122.09(19) | N1   | C15  | C14  | 128.16(18) |
| C6   | C1   | C2   | 118.8(2)   | N2   | C15  | C14  | 119.74(17) |
| C6   | C1   | C7   | 119.08(19) | C13  | C16  | C17  | 113.34(16) |
| C3   | C2   | C1   | 120.8(2)   | O4   | C17  | N2   | 109.67(16) |
| C4   | C3   | C2   | 118.6(2)   | O4   | C17  | C16  | 105.81(15) |
| C3   | C4   | Br1  | 117.86(18) | O4   | C17  | C18  | 111.74(16) |
| C3   | C4   | C5   | 122.3(2)   | N2   | C17  | C16  | 105.31(15) |
| C5   | C4   | Br1  | 119.88(18) | N2   | C17  | C18  | 110.97(15) |
| C4   | C5   | C6   | 118.7(2)   | C18  | C17  | C16  | 113.02(16) |
| C5   | C6   | C1   | 120.8(2)   | C19  | C18  | C17  | 117.57(18) |
| O1   | C7   | C1   | 121.5(2)   | C23  | C18  | C17  | 123.91(18) |
| O1   | C7   | C8   | 121.67(19) | C23  | C18  | C19  | 118.5(2)   |
| C1   | C7   | C8   | 116.72(18) | C20  | C19  | C18  | 120.6(2)   |
| C9   | C8   | C7   | 114.74(17) | C21  | C20  | C19  | 119.4(2)   |
| C10  | C9   | C8   | 119.23(19) | C20  | C21  | Br2  | 118.97(18) |
| C10  | C9   | C14  | 117.56(19) | C20  | C21  | C22  | 121.1(2)   |
| C14  | C9   | C8   | 123.13(19) | C22  | C21  | Br2  | 119.93(19) |
| C11  | C10  | C9   | 121.5(2)   | C23  | C22  | C21  | 119.2(2)   |
| C10  | C11  | C12  | 120.5(2)   | C22  | C23  | C18  | 121.2(2)   |
| C13  | C12  | C11  | 119.7(2)   | O2   | C24  | N2   | 106.07(17) |
| C12  | C13  | C14  | 119.44(19) | O3   | C24  | O2   | 123.99(19) |
| C12  | C13  | C16  | 120.95(18) | O3   | C24  | N2   | 129.94(19) |

**Table 6 Torsion Angles for 5g.**

| A   | B   | C   | D   | Angle/°  | A   | B   | C   | D   | Angle/°     |
|-----|-----|-----|-----|----------|-----|-----|-----|-----|-------------|
| Br1 | C4  | C5  | C6  | 179.8(2) | C12 | C13 | C14 | C9  | 0.3(3)      |
| Br2 | C21 | C22 | C23 | 178.6(2) | C12 | C13 | C14 | C15 | -174.99(18) |
| O1  | C7  | C8  | C9  | -11.4(3) | C12 | C13 | C16 | C17 | 139.48(19)  |
| O2  | N1  | C15 | N2  | 0.9(2)   | C13 | C14 | C15 | N1  | -166.8(2)   |

**Table 6 Torsion Angles for 5g.**

| A   | B   | C   | D   | Angle/°     | A   | B   | C   | D   | Angle/°     |
|-----|-----|-----|-----|-------------|-----|-----|-----|-----|-------------|
| O2  | N1  | C15 | C14 | -175.81(19) | C13 | C14 | C15 | N2  | 16.7(3)     |
| O4  | C17 | C18 | C19 | 49.4(2)     | C13 | C16 | C17 | O4  | 165.78(16)  |
| O4  | C17 | C18 | C23 | -131.4(2)   | C13 | C16 | C17 | N2  | 49.7(2)     |
| N1  | O2  | C24 | O3  | 176.8(2)    | C13 | C16 | C17 | C18 | -71.6(2)    |
| N1  | O2  | C24 | N2  | -2.8(2)     | C14 | C9  | C10 | C11 | 0.1(3)      |
| N2  | C17 | C18 | C19 | 172.18(17)  | C14 | C13 | C16 | C17 | -42.8(2)    |
| N2  | C17 | C18 | C23 | -8.7(3)     | C15 | N2  | C17 | O4  | -142.63(18) |
| C1  | C2  | C3  | C4  | 0.4(4)      | C15 | N2  | C17 | C16 | -29.2(2)    |
| C1  | C7  | C8  | C9  | 171.60(18)  | C15 | N2  | C17 | C18 | 93.4(2)     |
| C2  | C1  | C6  | C5  | 0.1(4)      | C15 | N2  | C24 | O2  | 3.3(2)      |
| C2  | C1  | C7  | O1  | -179.5(2)   | C15 | N2  | C24 | O3  | -176.3(2)   |
| C2  | C1  | C7  | C8  | -2.5(3)     | C16 | C13 | C14 | C9  | -177.44(18) |
| C2  | C3  | C4  | Br1 | 179.82(18)  | C16 | C13 | C14 | C15 | 7.2(3)      |
| C2  | C3  | C4  | C5  | 0.0(4)      | C16 | C17 | C18 | C19 | -69.8(2)    |
| C3  | C4  | C5  | C6  | -0.3(4)     | C16 | C17 | C18 | C23 | 109.3(2)    |
| C4  | C5  | C6  | C1  | 0.3(4)      | C17 | N2  | C15 | N1  | 179.02(18)  |
| C6  | C1  | C2  | C3  | -0.4(3)     | C17 | N2  | C15 | C14 | -4.0(3)     |
| C6  | C1  | C7  | O1  | -0.7(3)     | C17 | N2  | C24 | O2  | -178.44(17) |
| C6  | C1  | C7  | C8  | 176.3(2)    | C17 | N2  | C24 | O3  | 2.1(4)      |
| C7  | C1  | C2  | C3  | 178.4(2)    | C17 | C18 | C19 | C20 | 178.7(2)    |
| C7  | C1  | C6  | C5  | -178.8(2)   | C17 | C18 | C23 | C22 | -178.9(2)   |
| C7  | C8  | C9  | C10 | 94.4(2)     | C18 | C19 | C20 | C21 | -0.4(4)     |
| C7  | C8  | C9  | C14 | -89.0(2)    | C19 | C18 | C23 | C22 | 0.2(4)      |
| C8  | C9  | C10 | C11 | 176.9(2)    | C19 | C20 | C21 | Br2 | -178.89(18) |
| C8  | C9  | C14 | C13 | -176.78(18) | C19 | C20 | C21 | C22 | 1.5(4)      |
| C8  | C9  | C14 | C15 | -1.8(3)     | C20 | C21 | C22 | C23 | -1.7(4)     |
| C9  | C10 | C11 | C12 | -0.4(4)     | C21 | C22 | C23 | C18 | 0.9(4)      |
| C9  | C14 | C15 | N1  | 18.0(3)     | C23 | C18 | C19 | C20 | -0.5(3)     |
| C9  | C14 | C15 | N2  | -158.50(19) | C24 | O2  | N1  | C15 | 1.2(2)      |
| C10 | C9  | C14 | C13 | -0.1(3)     | C24 | N2  | C15 | N1  | -2.7(2)     |
| C10 | C9  | C14 | C15 | 174.85(19)  | C24 | N2  | C15 | C14 | 174.34(18)  |
| C10 | C11 | C12 | C13 | 0.6(3)      | C24 | N2  | C17 | O4  | 39.4(3)     |
| C11 | C12 | C13 | C14 | -0.5(3)     | C24 | N2  | C17 | C16 | 152.79(19)  |
| C11 | C12 | C13 | C16 | 177.21(19)  | C24 | N2  | C17 | C18 | -84.6(2)    |

**Table 7 Hydrogen Atom Coordinates ( $\text{\AA} \times 10^4$ ) and Isotropic Displacement Parameters ( $\text{\AA}^2 \times 10^3$ ) for 5g.**

| Atom | x       | y       | z        | U(eq) |
|------|---------|---------|----------|-------|
| H4   | 6221.55 | 4634.51 | 10258.3  | 57    |
| H2   | 4582.48 | 3965.58 | 792.7    | 49    |
| H3   | 3122.64 | 4119.09 | -1239.37 | 51    |
| H5   | 2185.64 | 2300.57 | -701.05  | 68    |
| H6   | 3652.69 | 2144.53 | 1310.78  | 59    |
| H8A  | 6332.1  | 3519.47 | 2007.44  | 44    |
| H8B  | 5616.11 | 3856.02 | 3039.75  | 44    |
| H10  | 7882.42 | 2958.49 | 3180.44  | 49    |
| H11  | 9253.2  | 2822.98 | 5308.68  | 51    |

**Table 7 Hydrogen Atom Coordinates ( $\text{\AA}\times 10^4$ ) and Isotropic Displacement Parameters ( $\text{\AA}^2\times 10^3$ ) for 5g.**

| <b>Atom</b> | <b><i>x</i></b> | <b><i>y</i></b> | <b><i>z</i></b> | <b>U(eq)</b> |
|-------------|-----------------|-----------------|-----------------|--------------|
| H12         | 9073.35         | 3140            | 7780.49         | 45           |
| H16A        | 8103.65         | 3666.95         | 9422.16         | 39           |
| H16B        | 7011.32         | 3288.83         | 9093.09         | 39           |
| H19         | 8451.78         | 4756.62         | 10640.15        | 47           |
| H20         | 9531.02         | 5628.65         | 10410.62        | 53           |
| H22         | 7789.26         | 5997.6          | 6138.79         | 69           |
| H23         | 6721.82         | 5124.51         | 6359.33         | 56           |

## 12. NMR Spectra for New Compounds

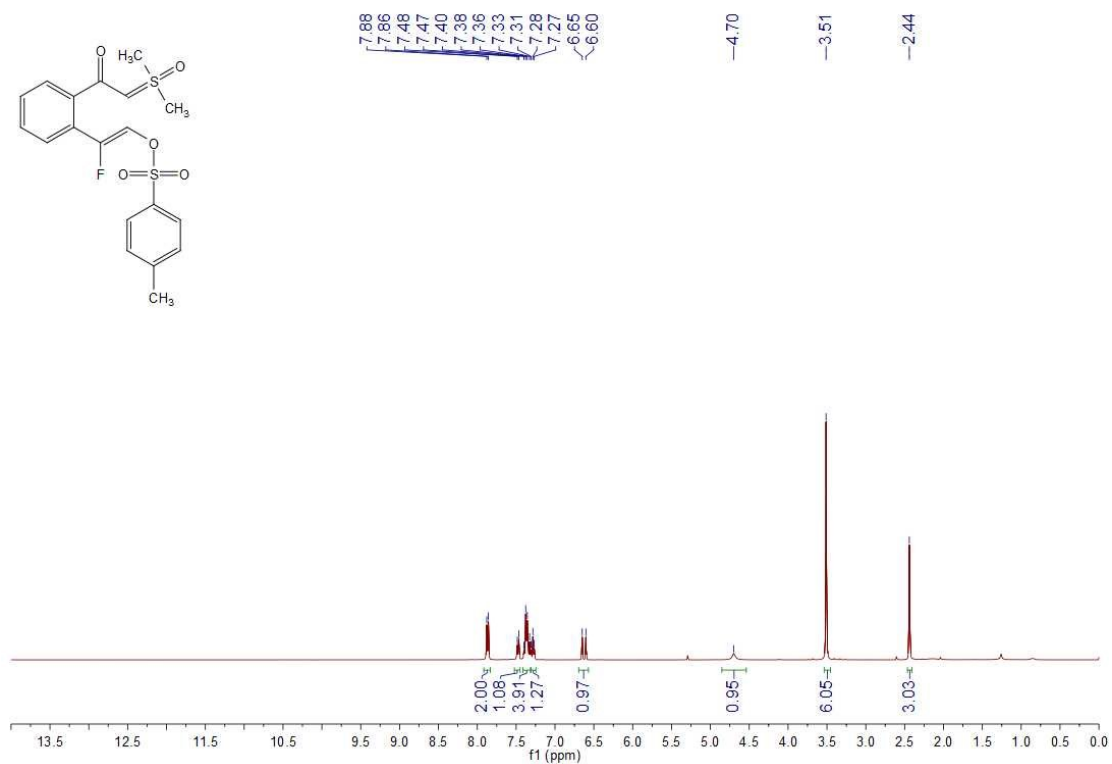

<sup>1</sup>H NMR spectrum of **3a** (400 MHz, CDCl<sub>3</sub>)

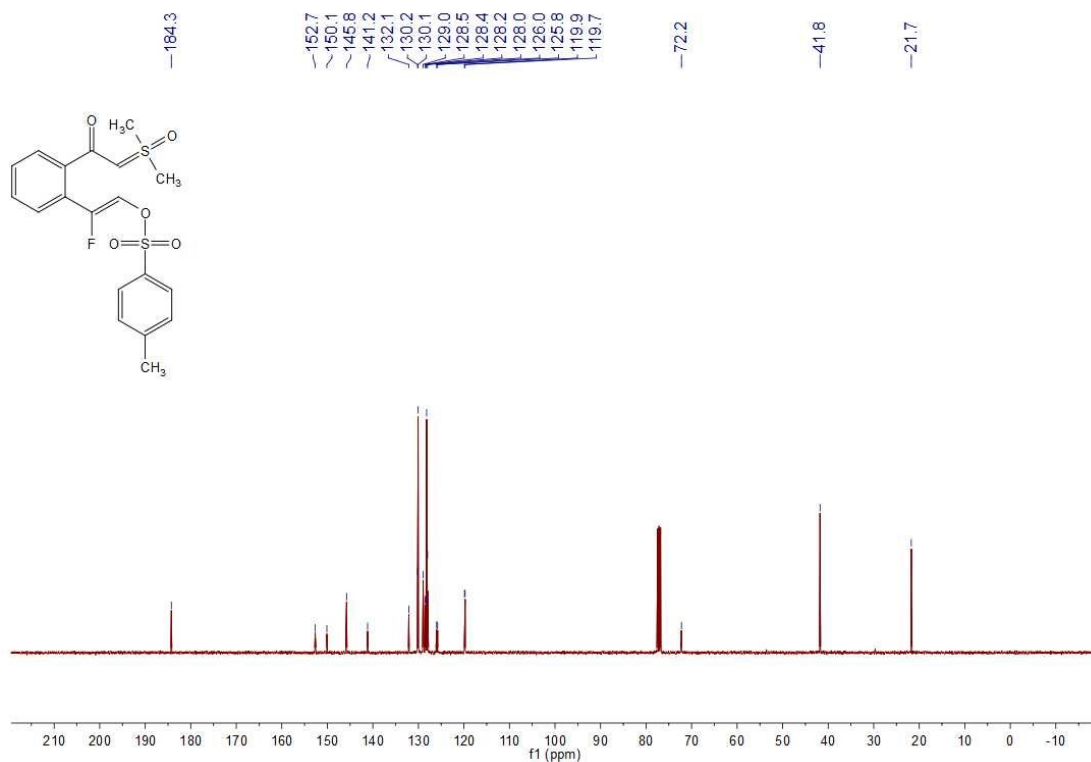

<sup>13</sup>C NMR spectrum of **3a** (101 MHz, CDCl<sub>3</sub>)

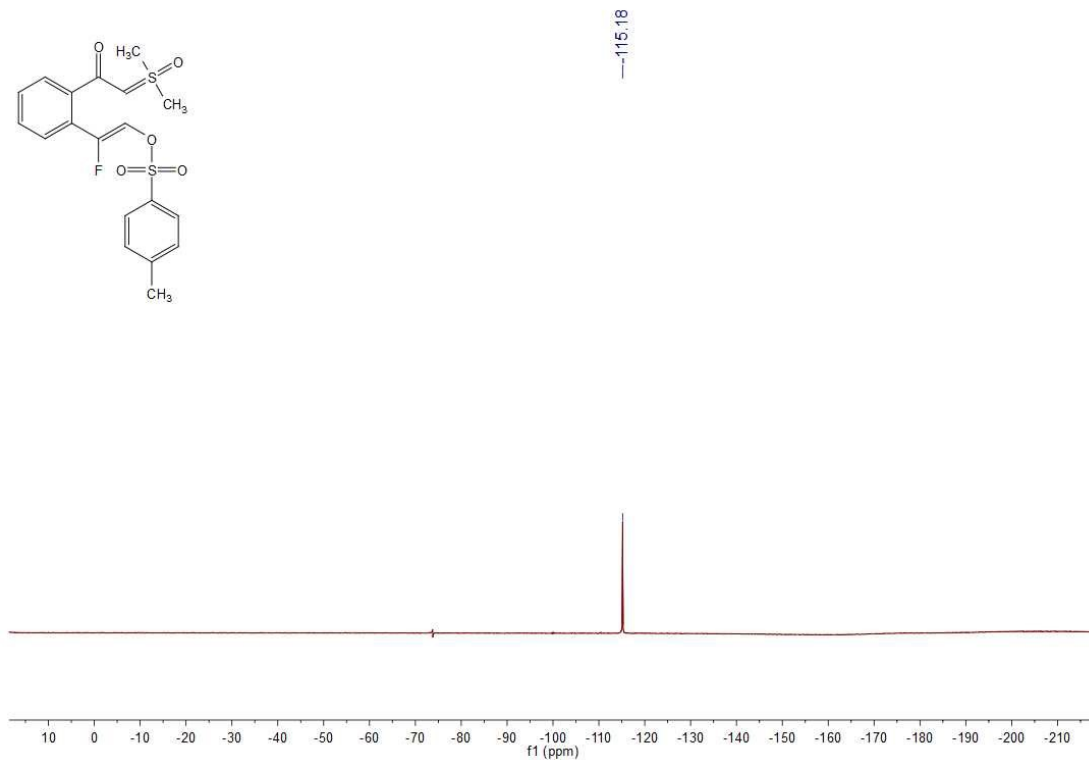

$^{19}\text{F}$  NMR spectrum of **3a** (376 MHz,  $\text{CDCl}_3$ )

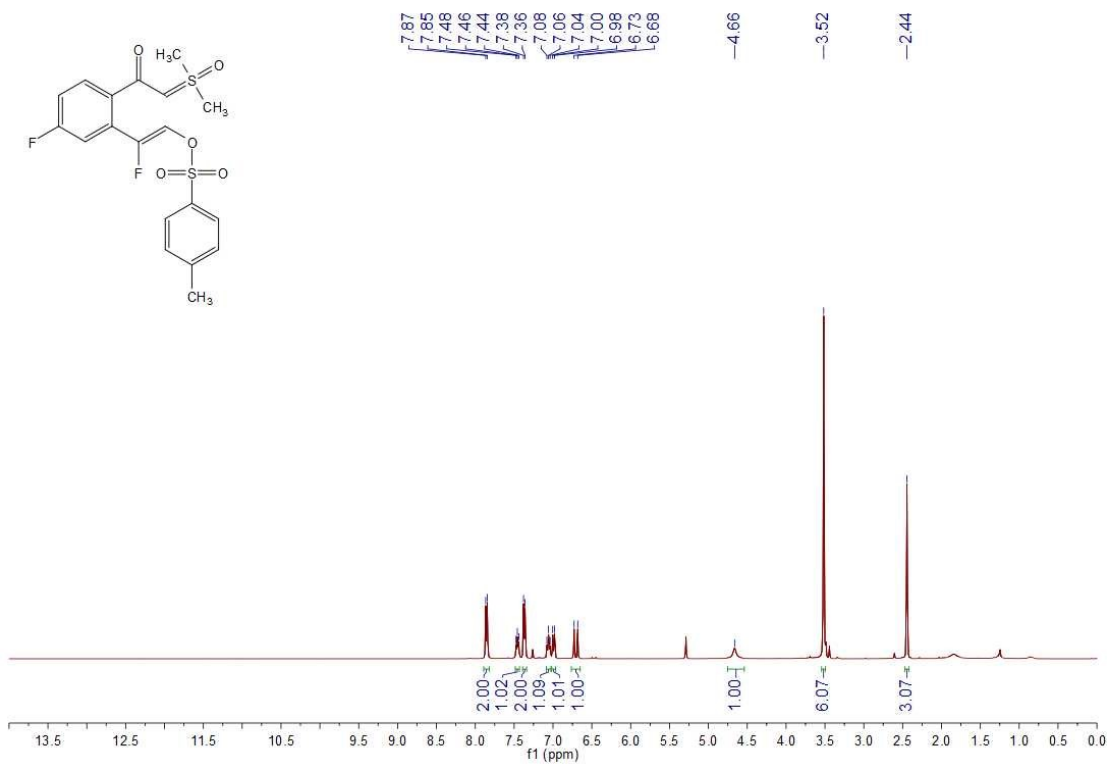

$^1\text{H}$  NMR spectrum of **3b** (400 MHz,  $\text{CDCl}_3$ )

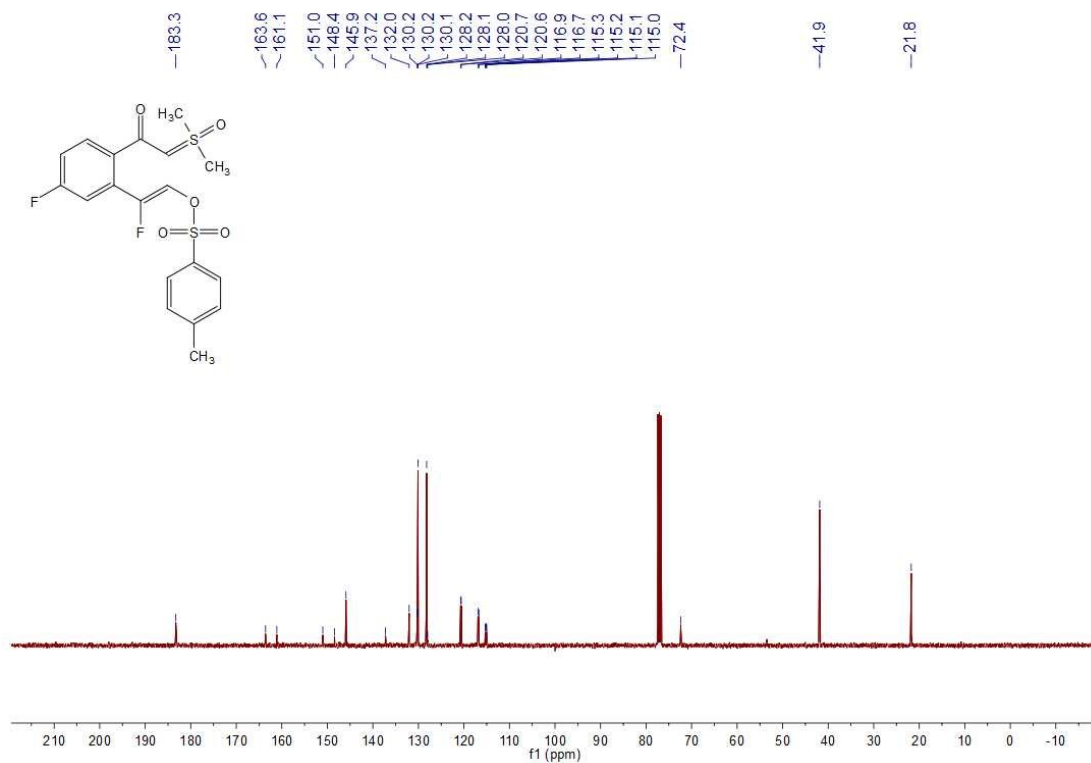

<sup>13</sup>C NMR spectrum of **3b** (101 MHz, CDCl<sub>3</sub>)

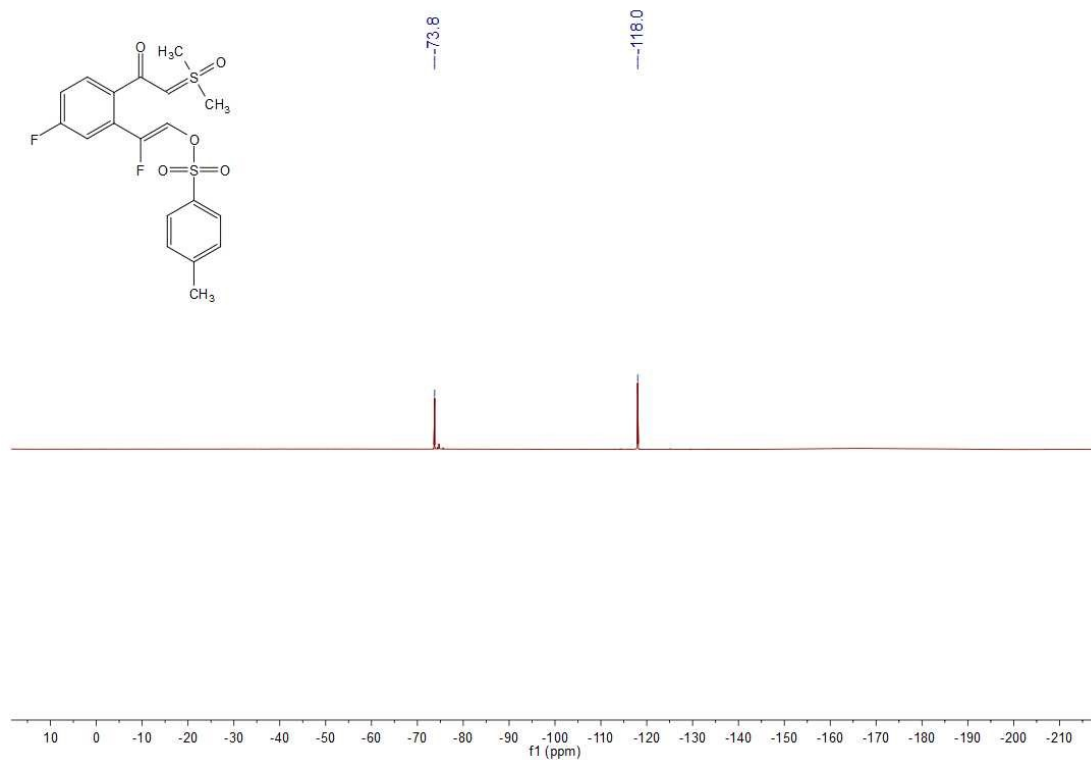

<sup>19</sup>F NMR spectrum of **3b** (376 MHz, CDCl<sub>3</sub>)

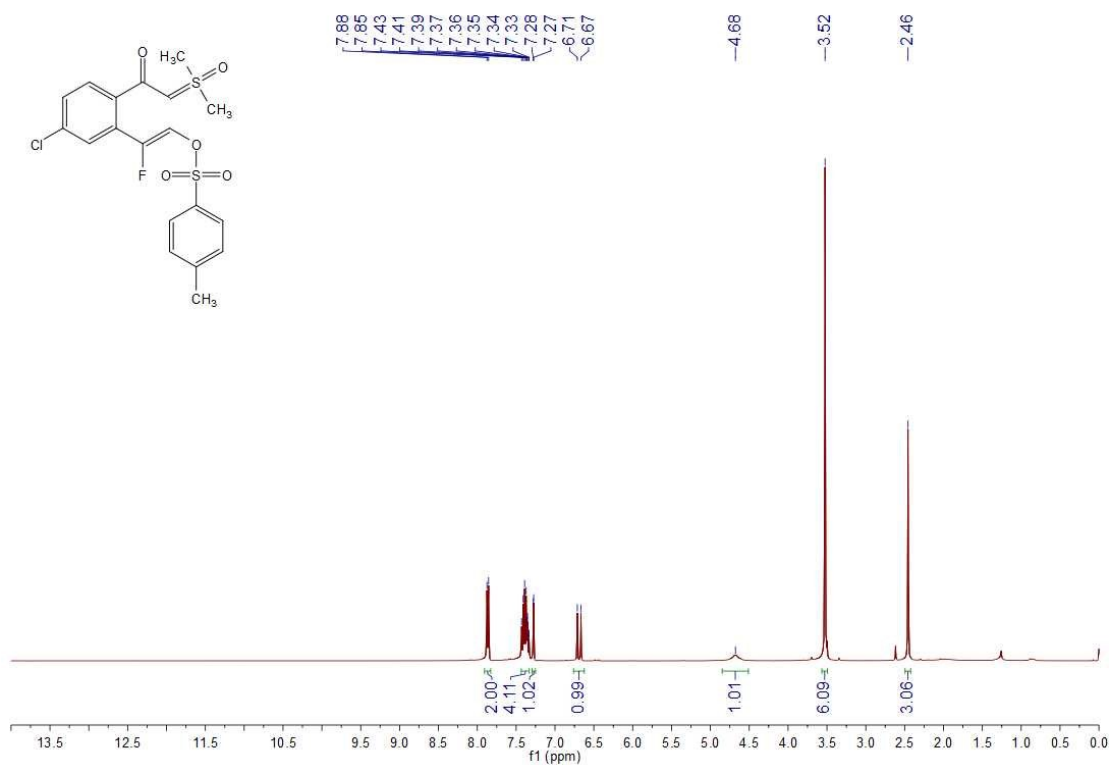

<sup>1</sup>H NMR spectrum of **3c** (400 MHz, CDCl<sub>3</sub>)

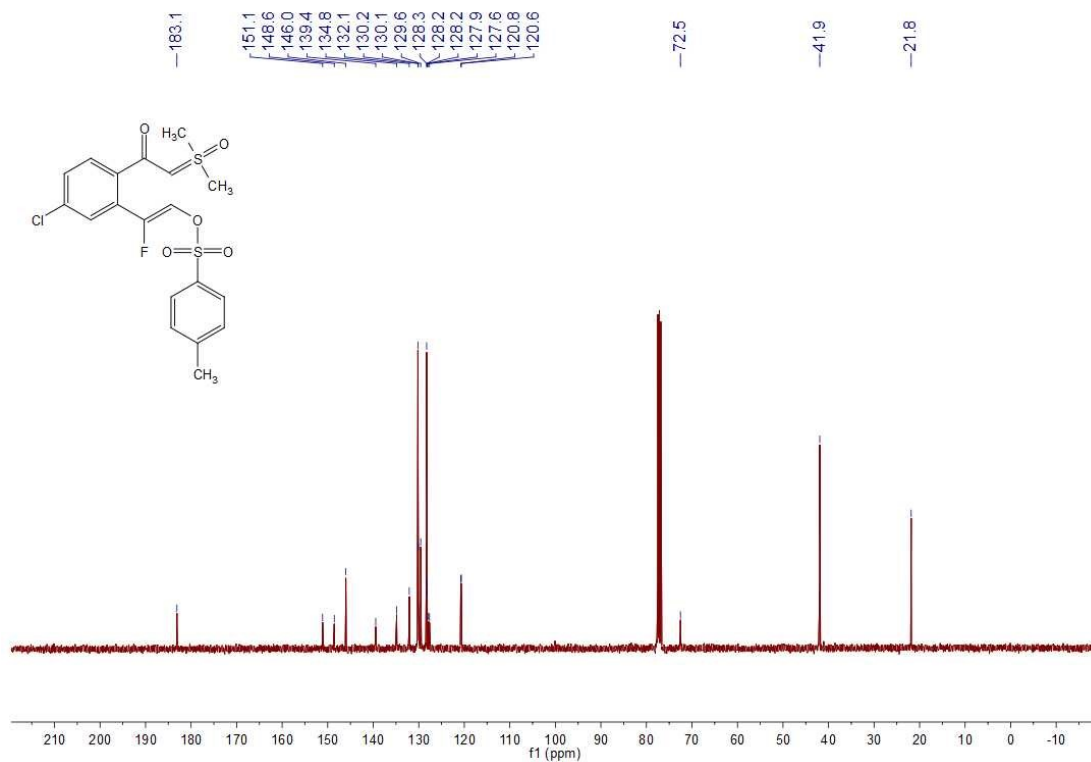

<sup>13</sup>C NMR spectrum of **3c** (101 MHz, CDCl<sub>3</sub>)



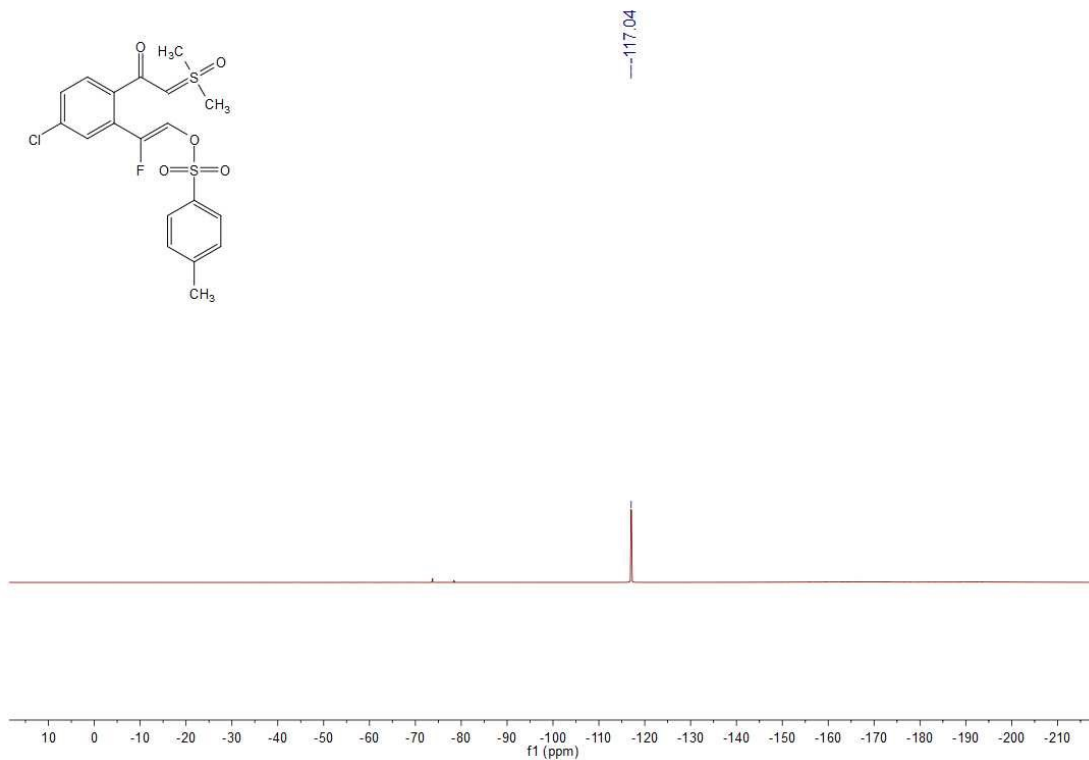

$^{19}\text{F}$  NMR spectrum of **3c** (376 MHz,  $\text{CDCl}_3$ )

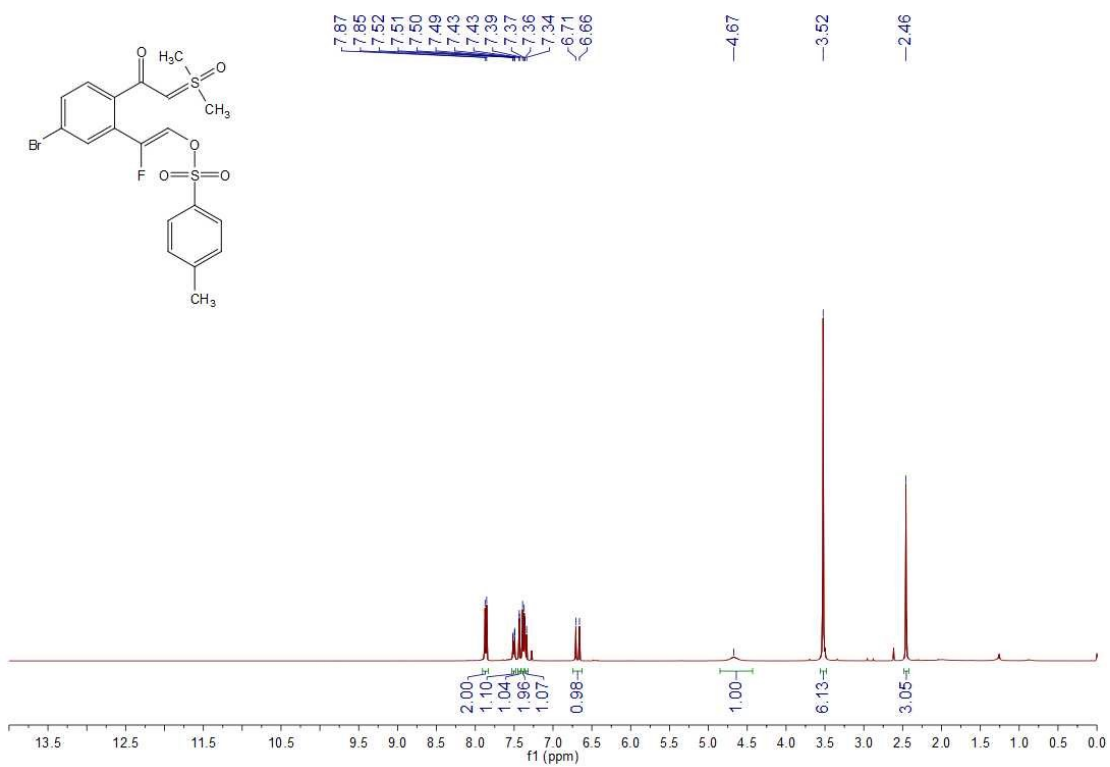

$^1\text{H}$  NMR spectrum of **3d** (400 MHz,  $\text{CDCl}_3$ )

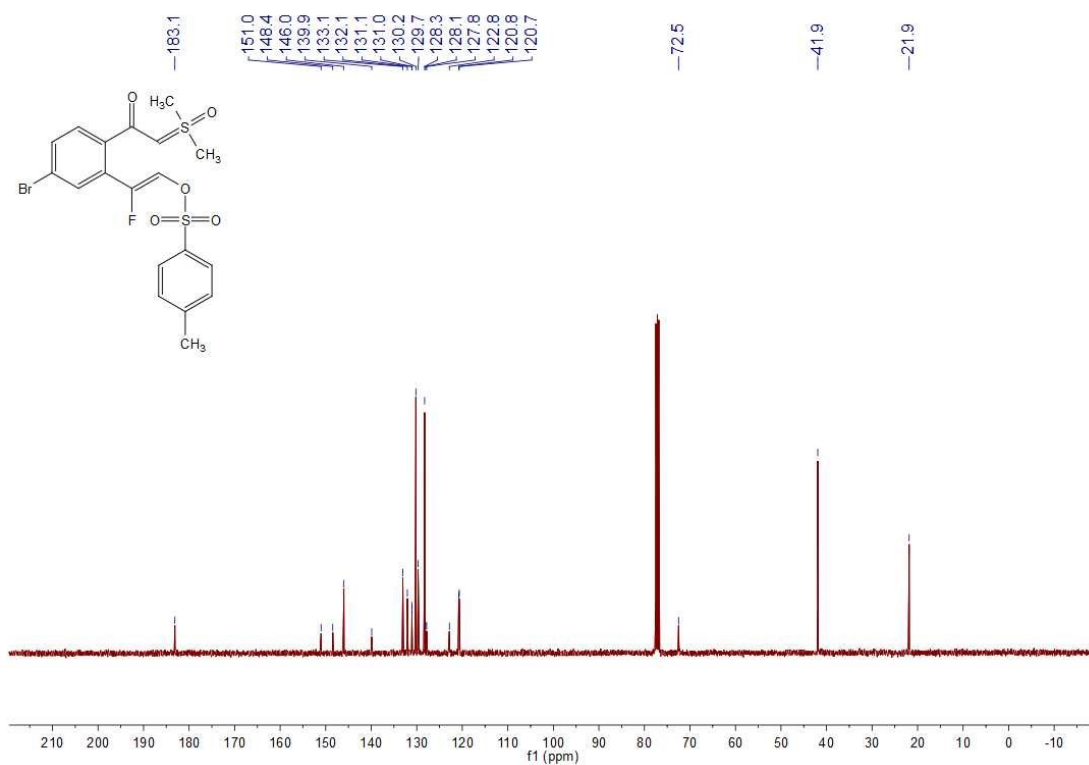

<sup>13</sup>C NMR spectrum of **3d** (101 MHz, CDCl<sub>3</sub>)

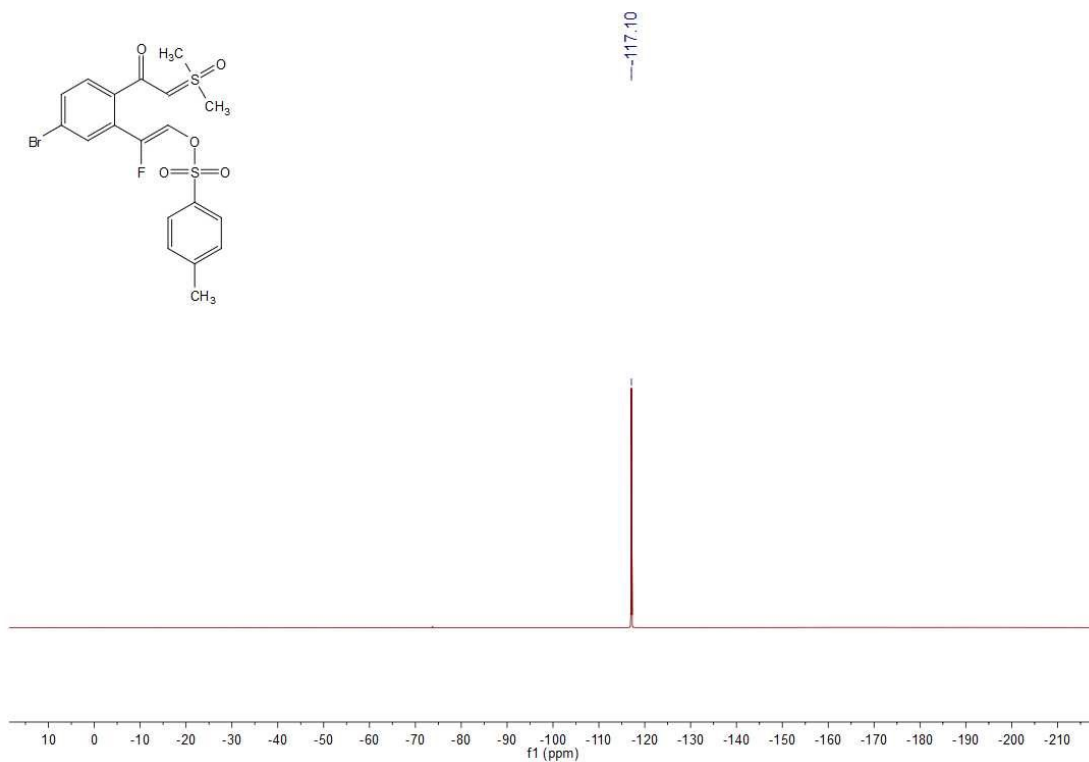

<sup>19</sup>F NMR spectrum of **3d** (376 MHz, CDCl<sub>3</sub>)

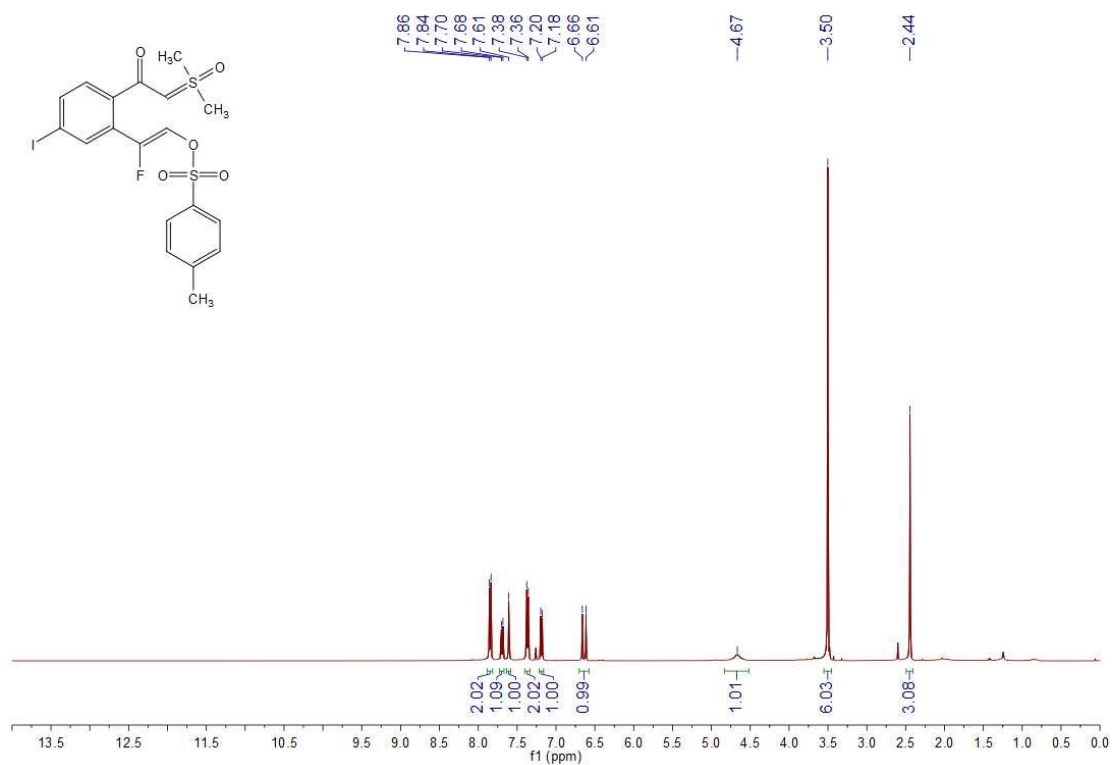

<sup>1</sup>H NMR spectrum of **3e** (400 MHz, CDCl<sub>3</sub>)

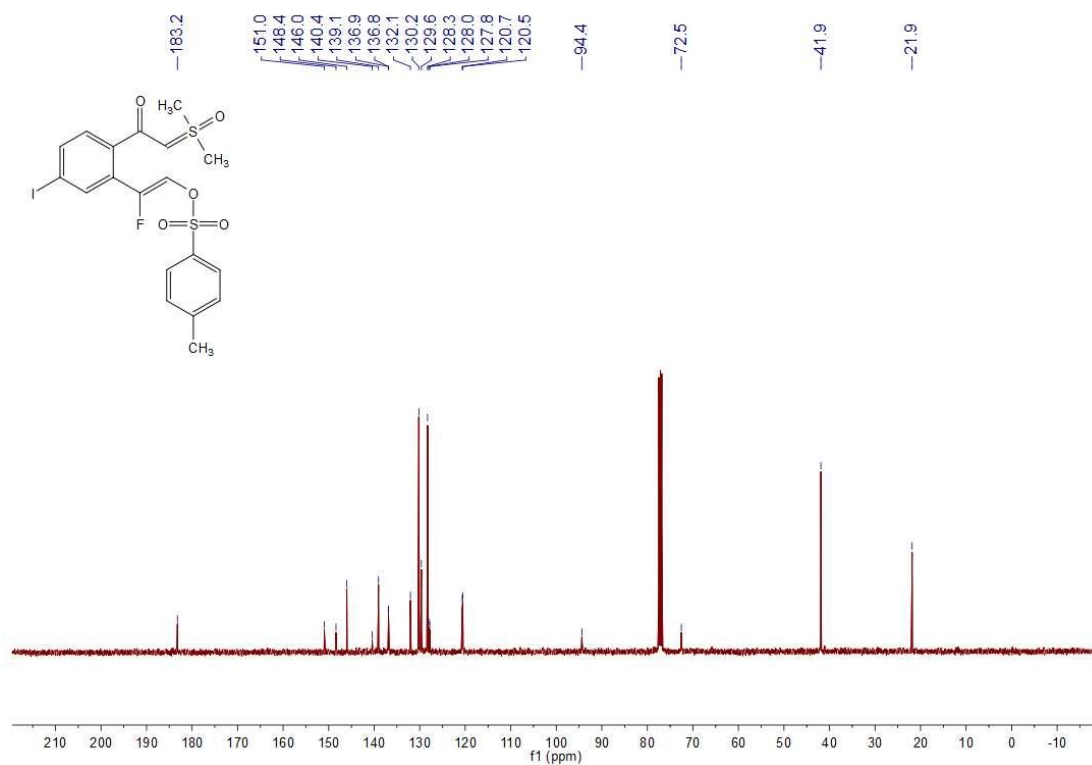

<sup>13</sup>C NMR spectrum of **3e** (101 MHz, CDCl<sub>3</sub>)

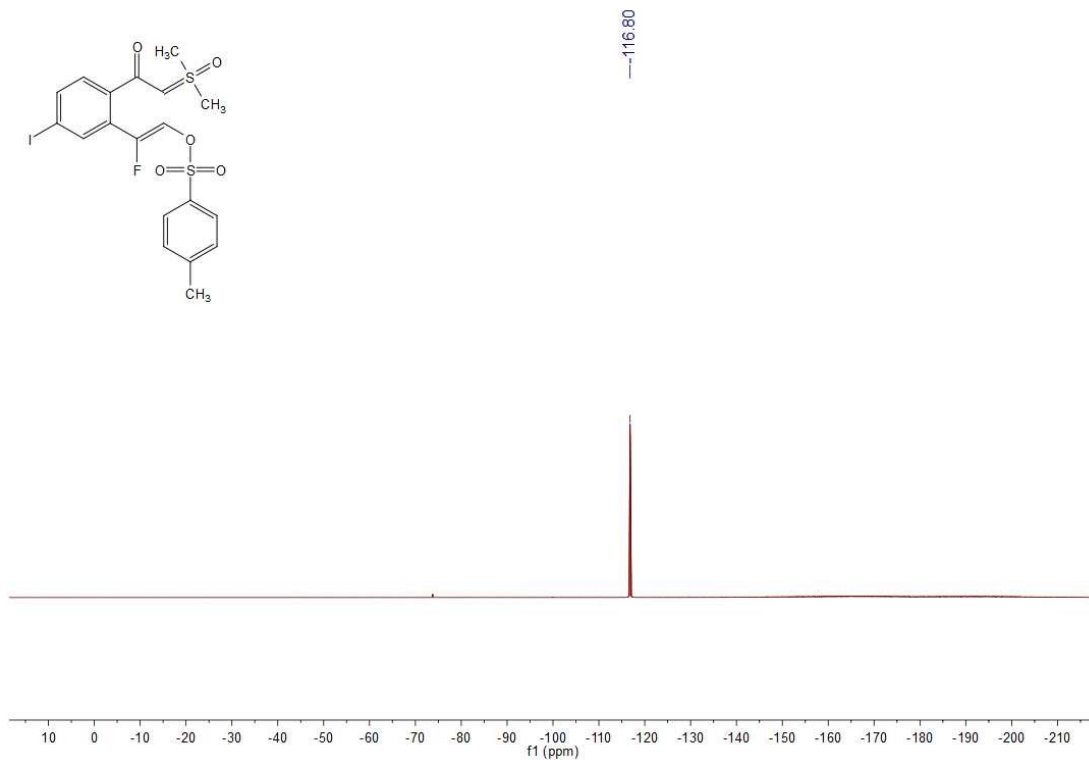

$^{19}\text{F}$  NMR spectrum of **3e** (376 MHz,  $\text{CDCl}_3$ )

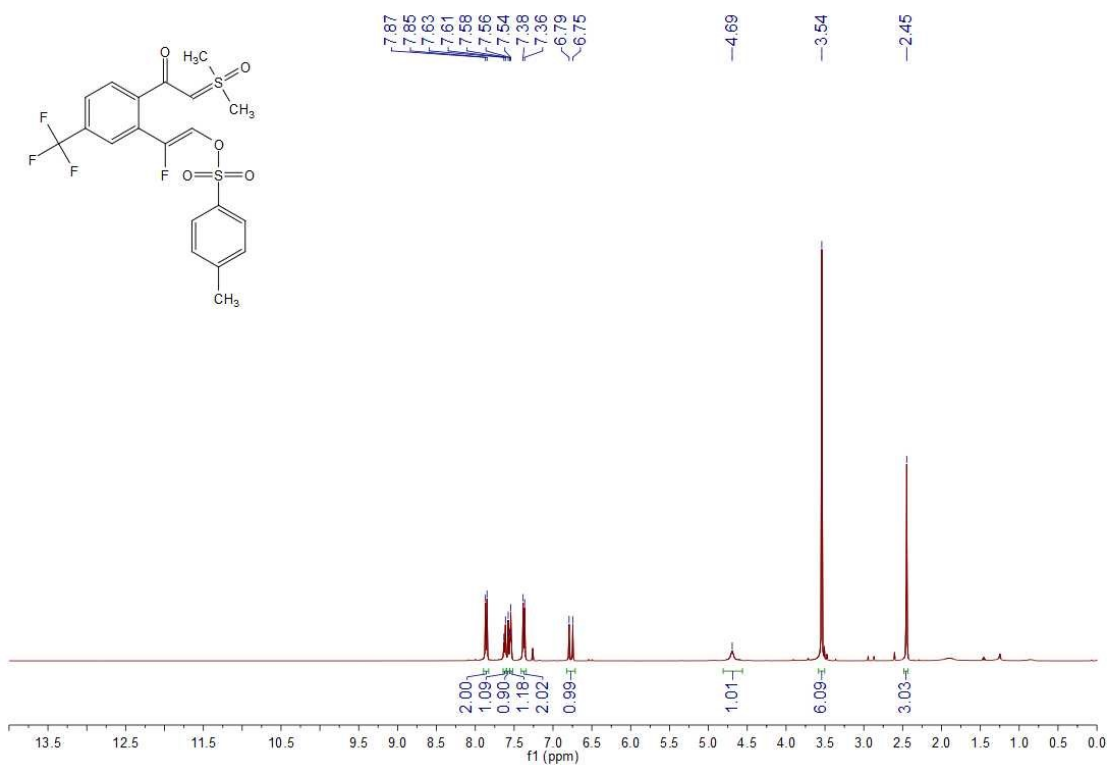

$^1\text{H}$  NMR spectrum of **3f** (400 MHz,  $\text{CDCl}_3$ )

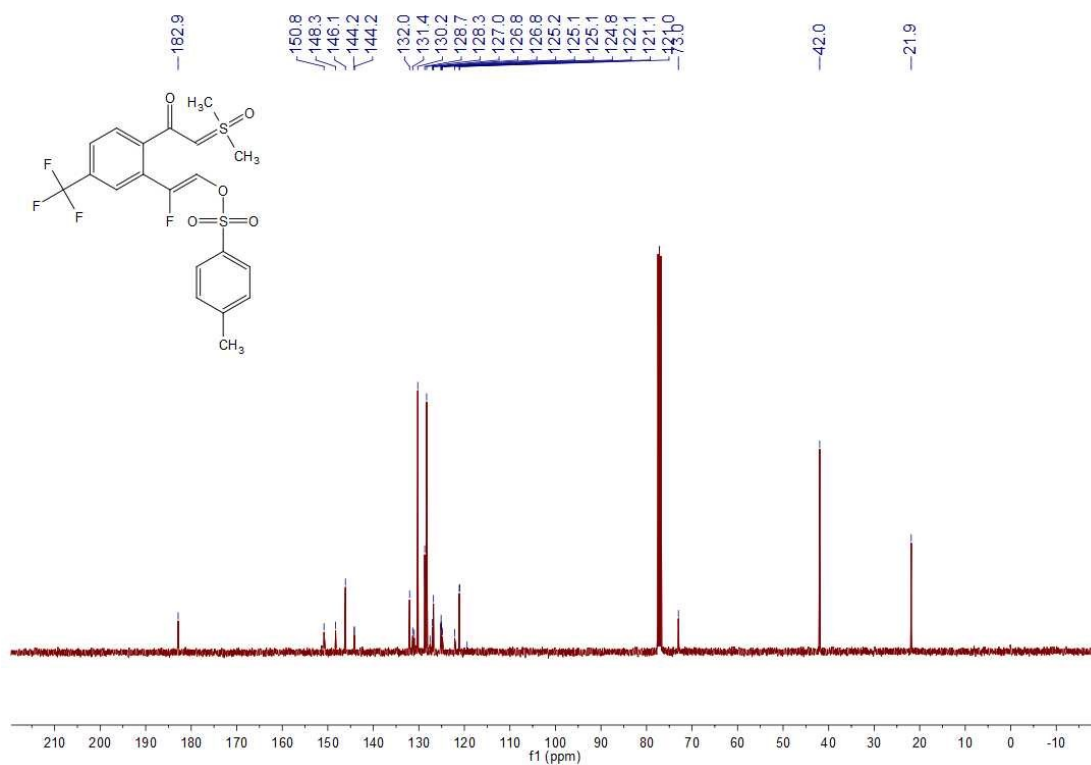

$^{13}\text{C}$  NMR spectrum of **3f** (101 MHz,  $\text{CDCl}_3$ )

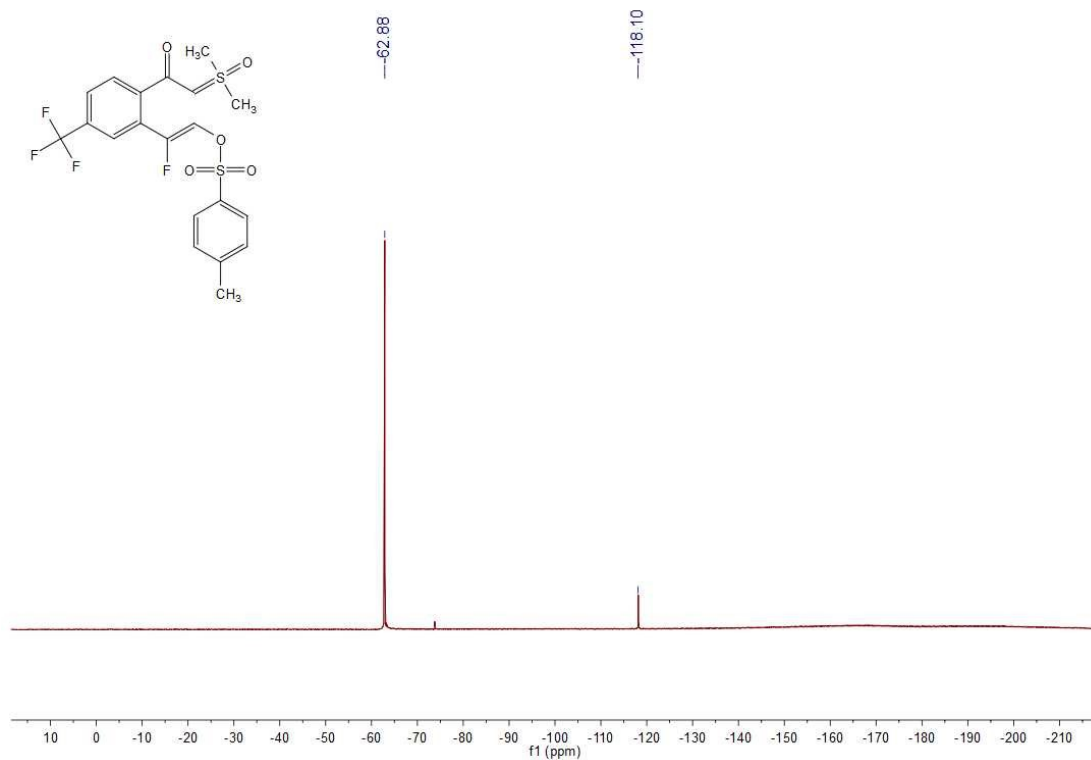

$^{19}\text{F}$  NMR spectrum of **3f** (376 MHz,  $\text{CDCl}_3$ )

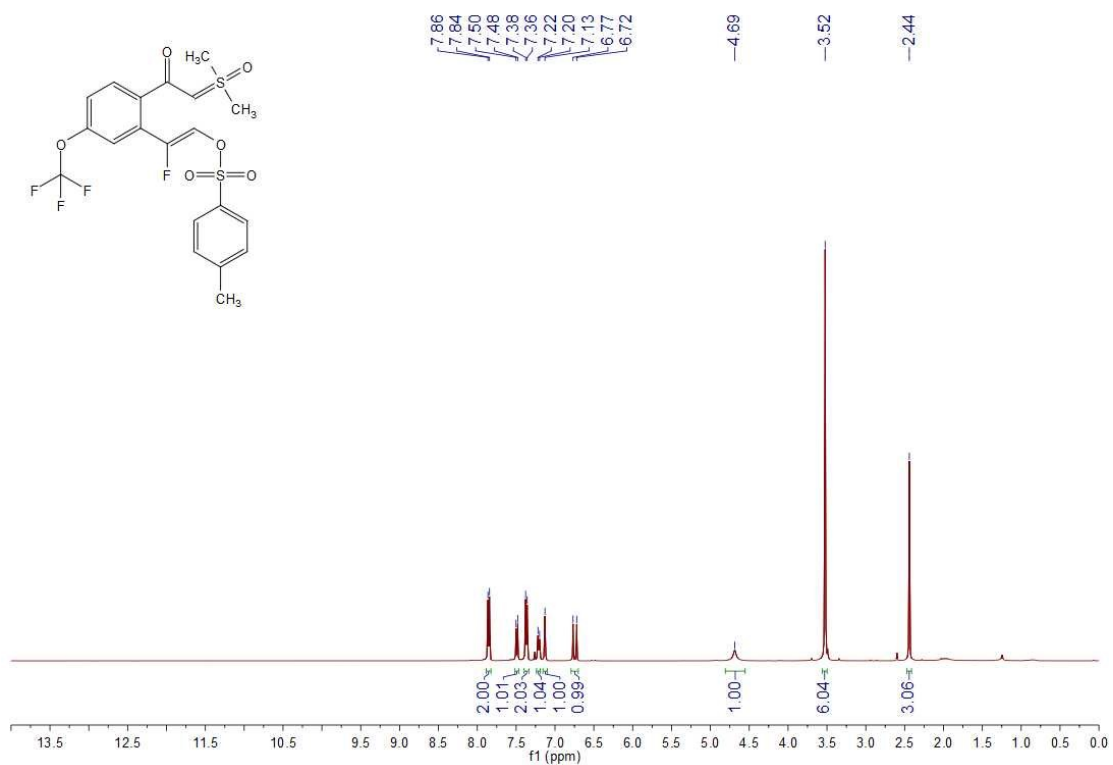

<sup>1</sup>H NMR spectrum of **3g** (400 MHz, CDCl<sub>3</sub>)

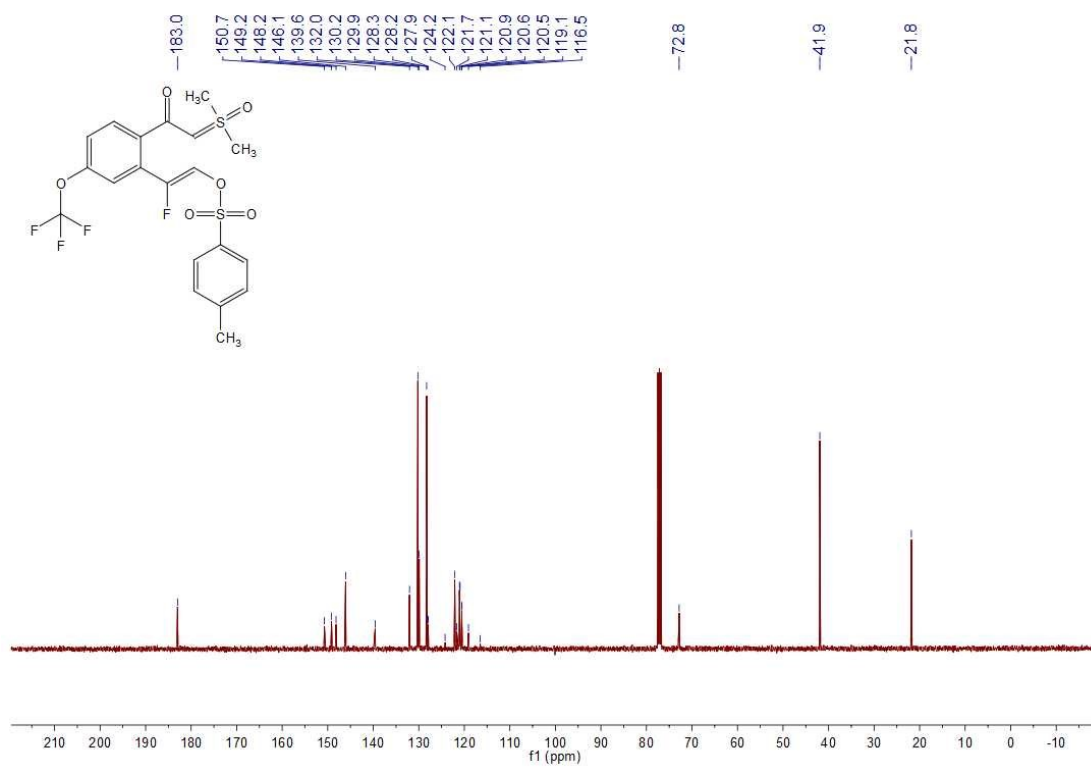

<sup>13</sup>C NMR spectrum of **3g** (101 MHz, CDCl<sub>3</sub>)

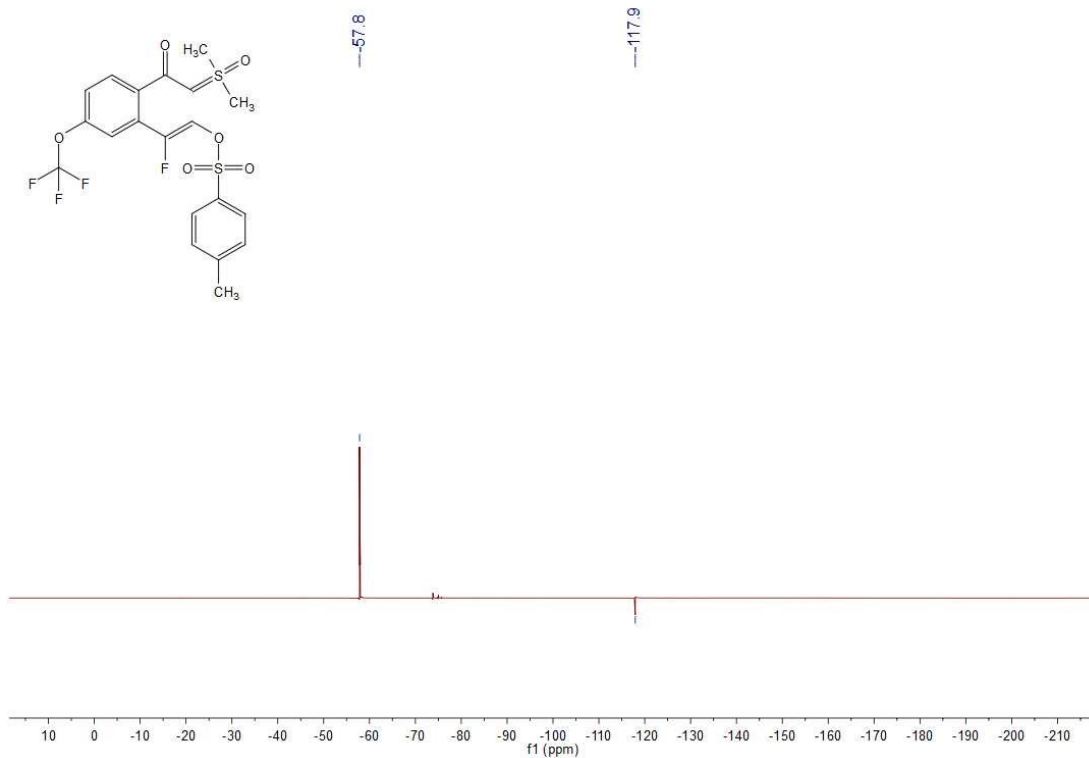

$^{19}\text{F}$  NMR spectrum of **3g** (376 MHz,  $\text{CDCl}_3$ )

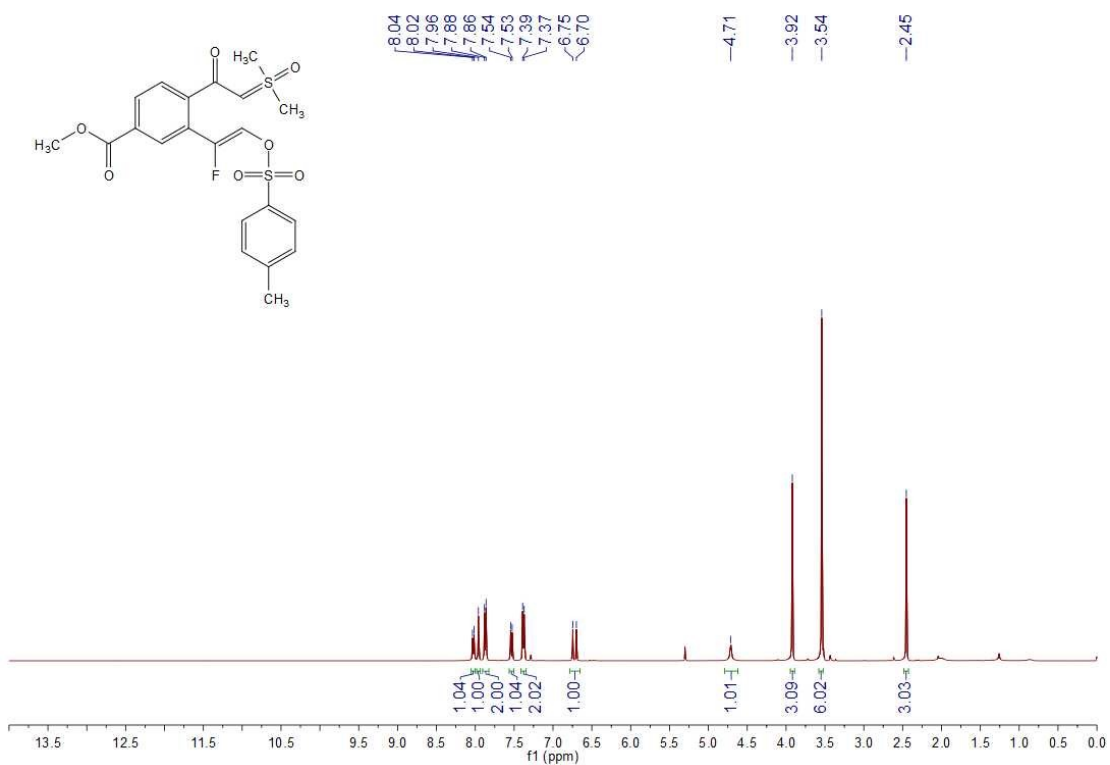

$^1\text{H}$  NMR spectrum of **3h** (400 MHz,  $\text{CDCl}_3$ )

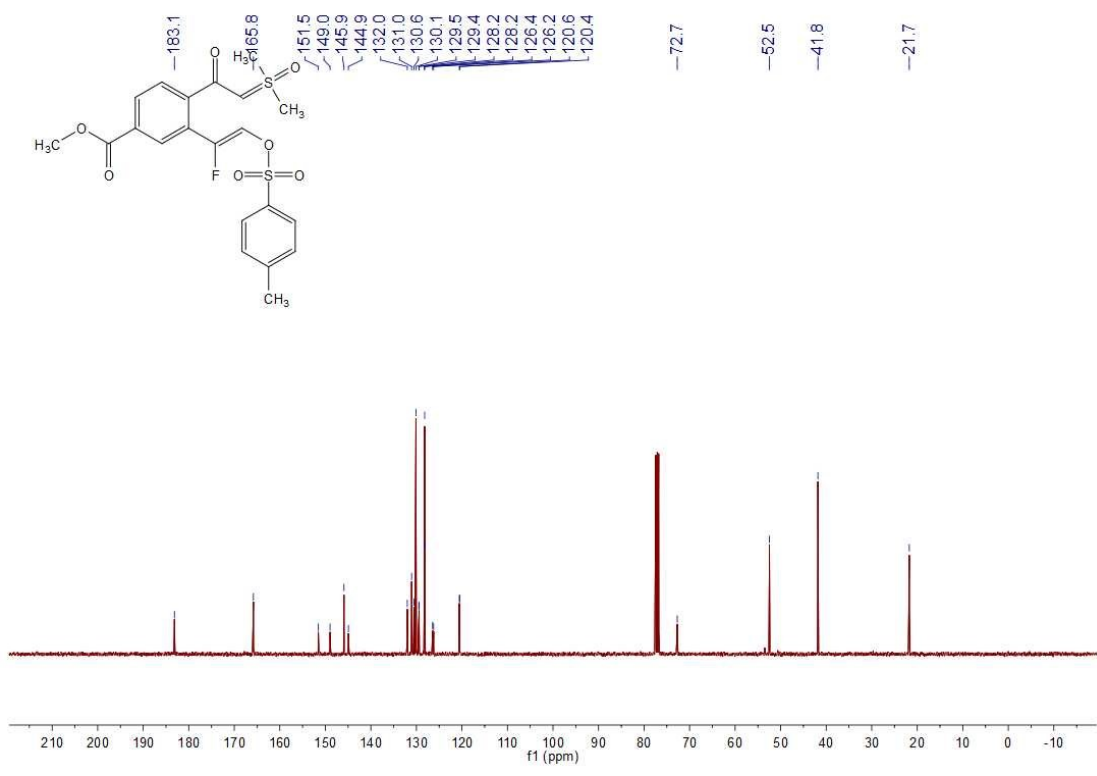

<sup>13</sup>C NMR spectrum of **3h** (101 MHz, CDCl<sub>3</sub>)

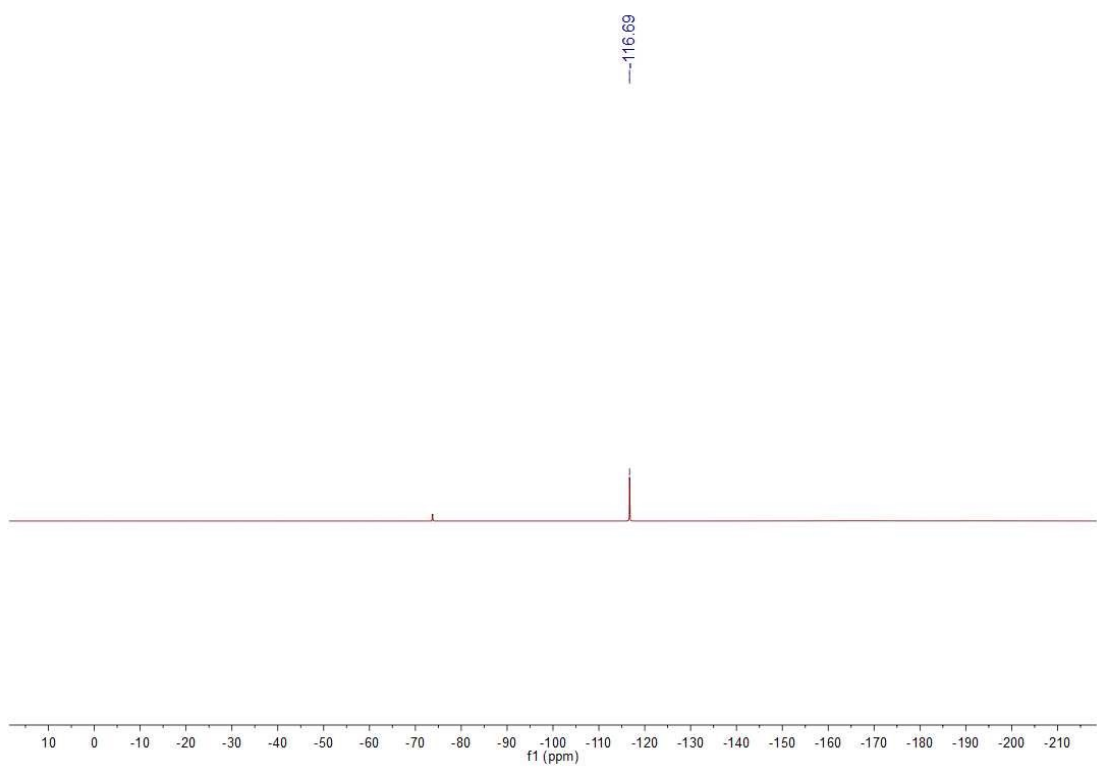

<sup>19</sup>F NMR spectrum of **3h** (376 MHz, CDCl<sub>3</sub>)



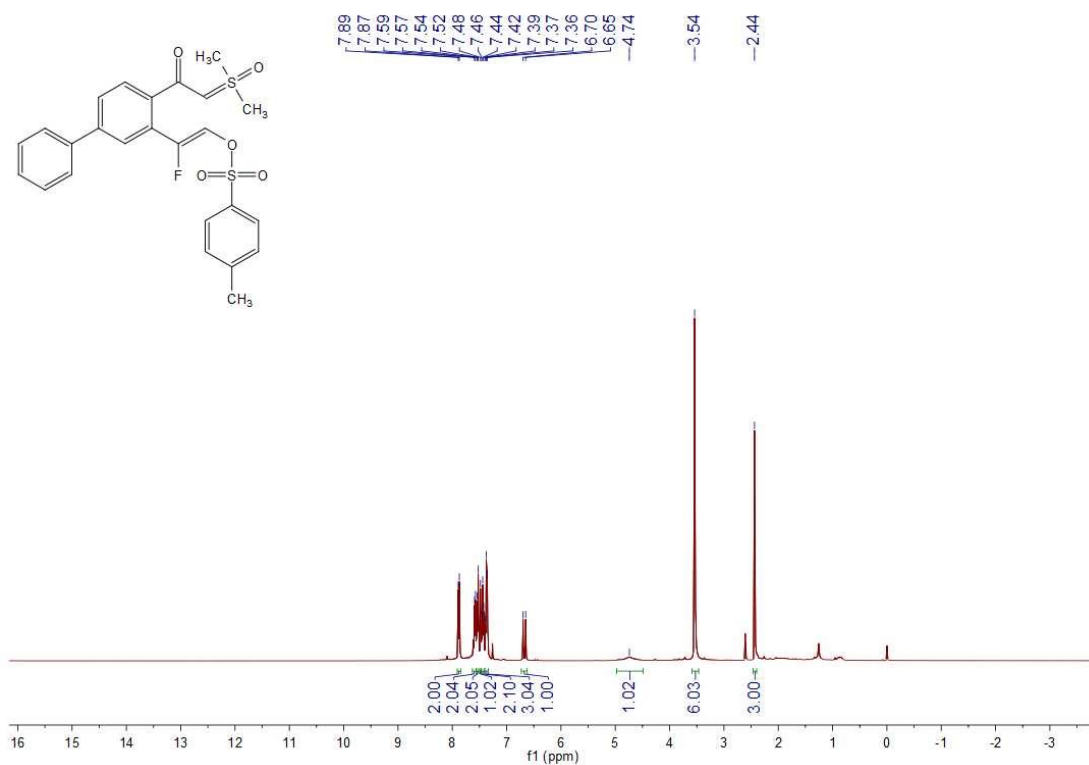

<sup>1</sup>H NMR spectrum of **3i** (400 MHz, CDCl<sub>3</sub>)

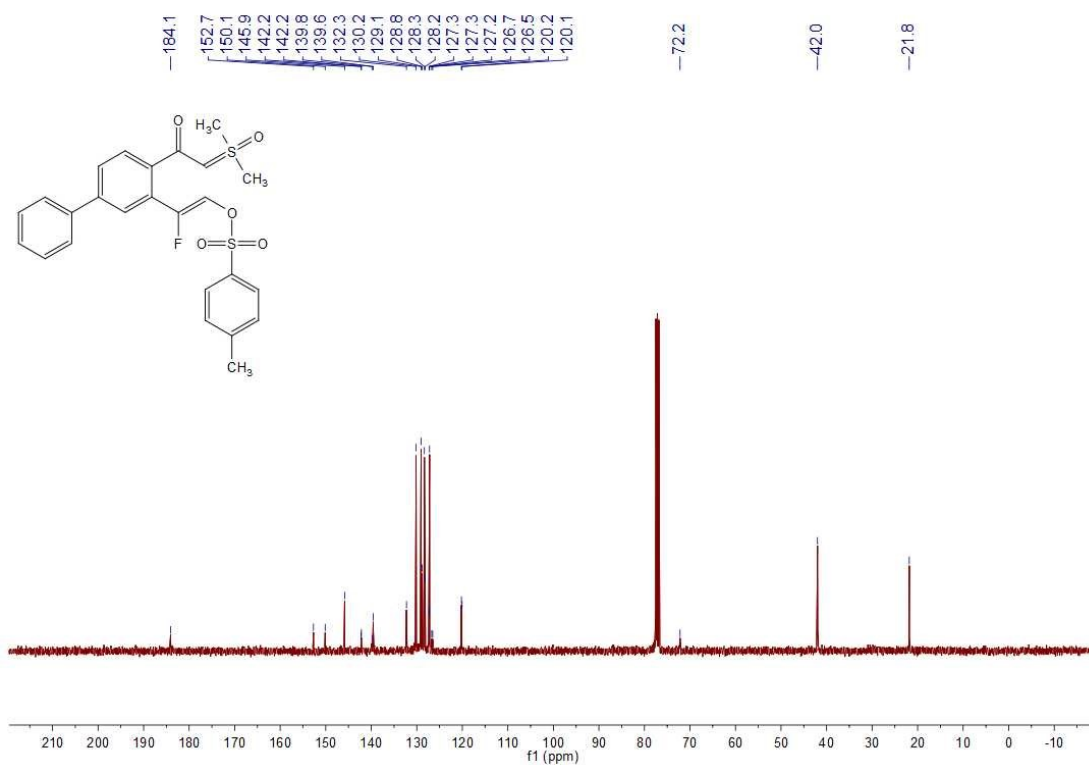

<sup>13</sup>C NMR spectrum of **3i** (101 MHz, CDCl<sub>3</sub>)

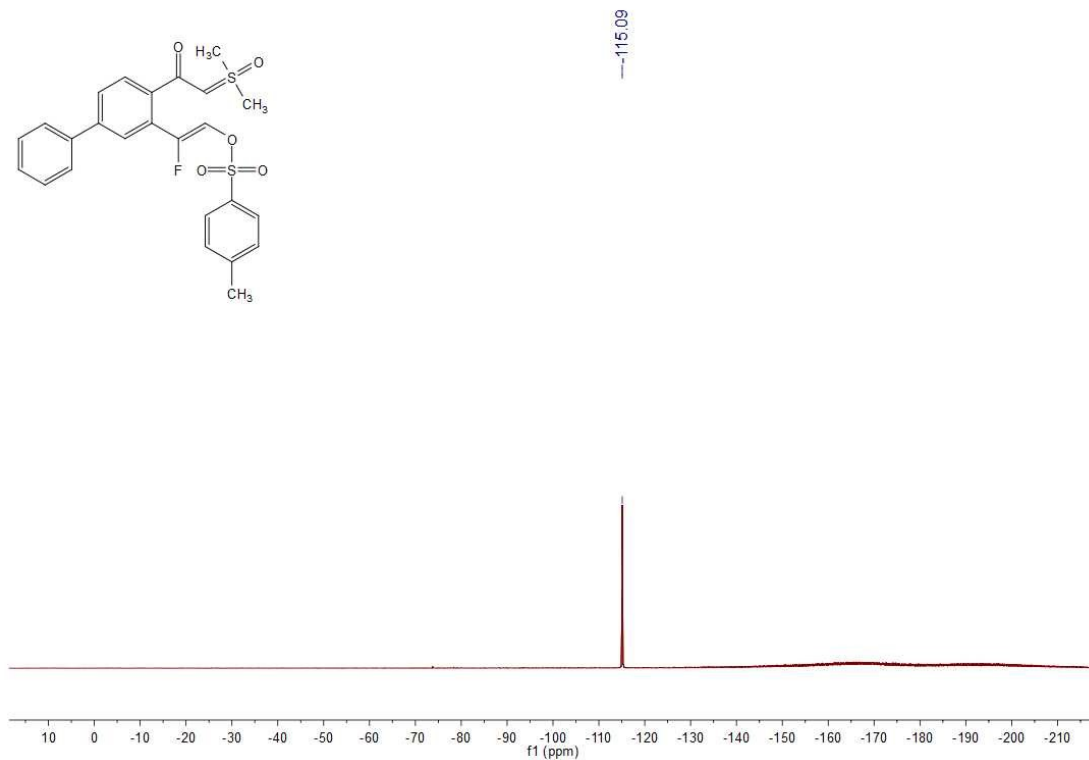

$^{19}\text{F}$  NMR spectrum of **3i** (376 MHz,  $\text{CDCl}_3$ )

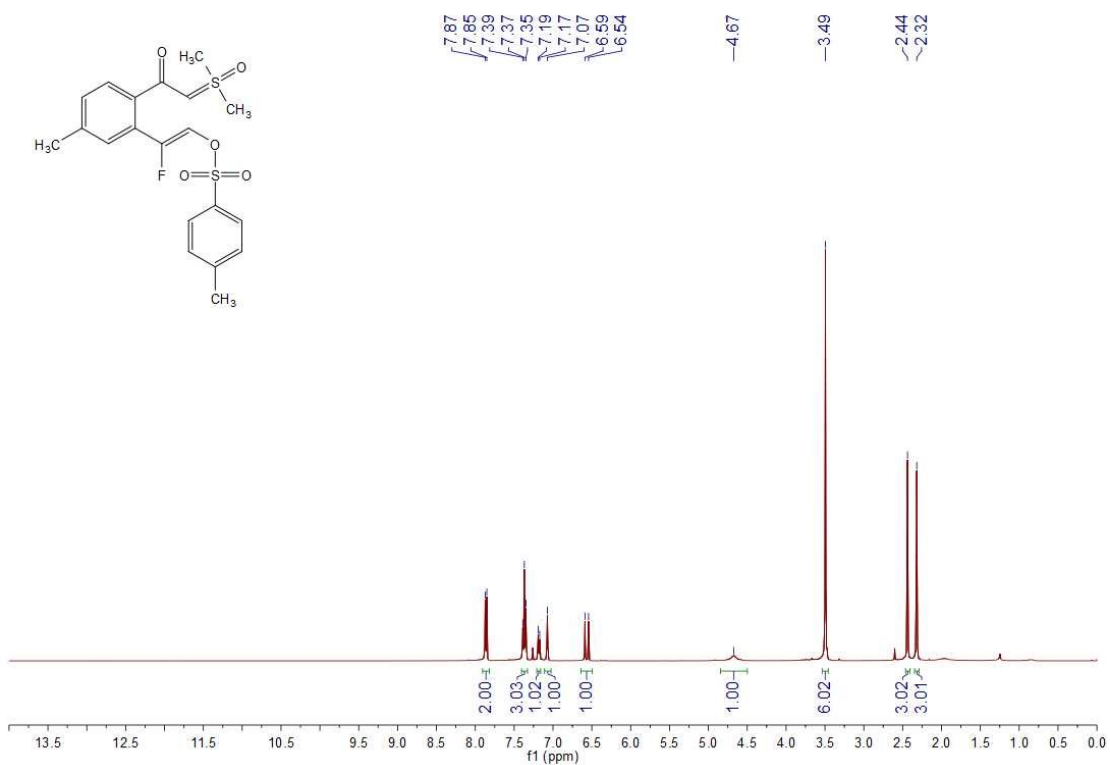

$^1\text{H}$  NMR spectrum of **3j** (400 MHz,  $\text{CDCl}_3$ )

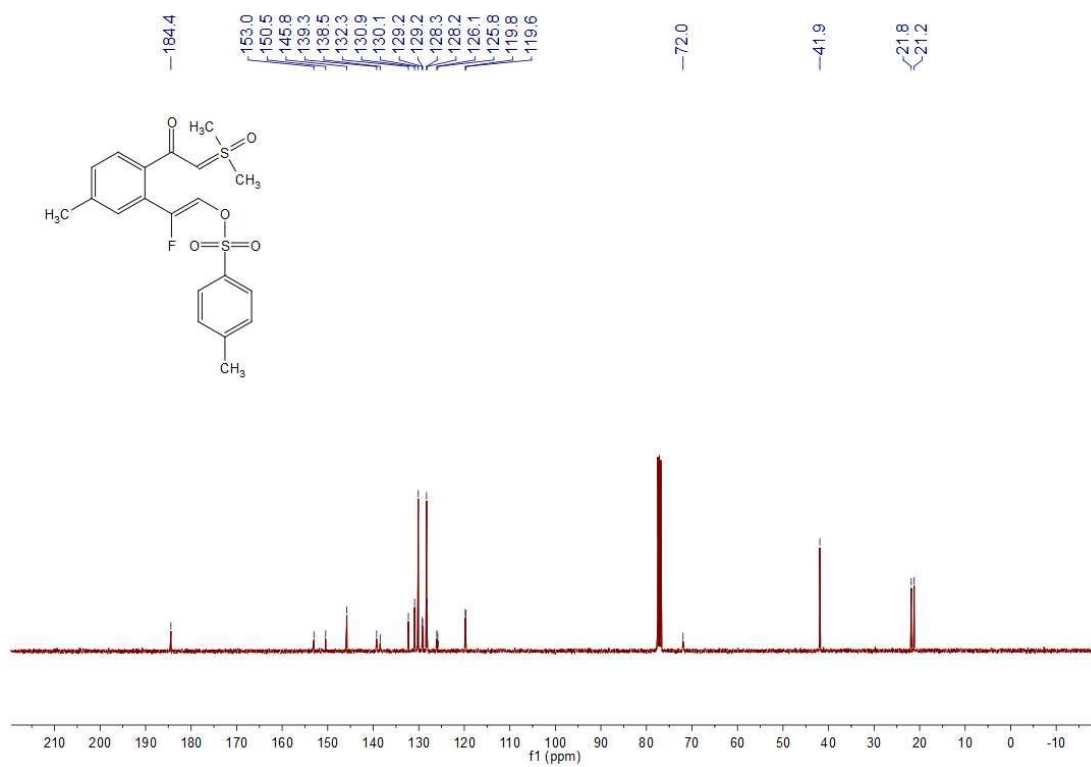

<sup>13</sup>C NMR spectrum of **3j** (101 MHz, CDCl<sub>3</sub>)

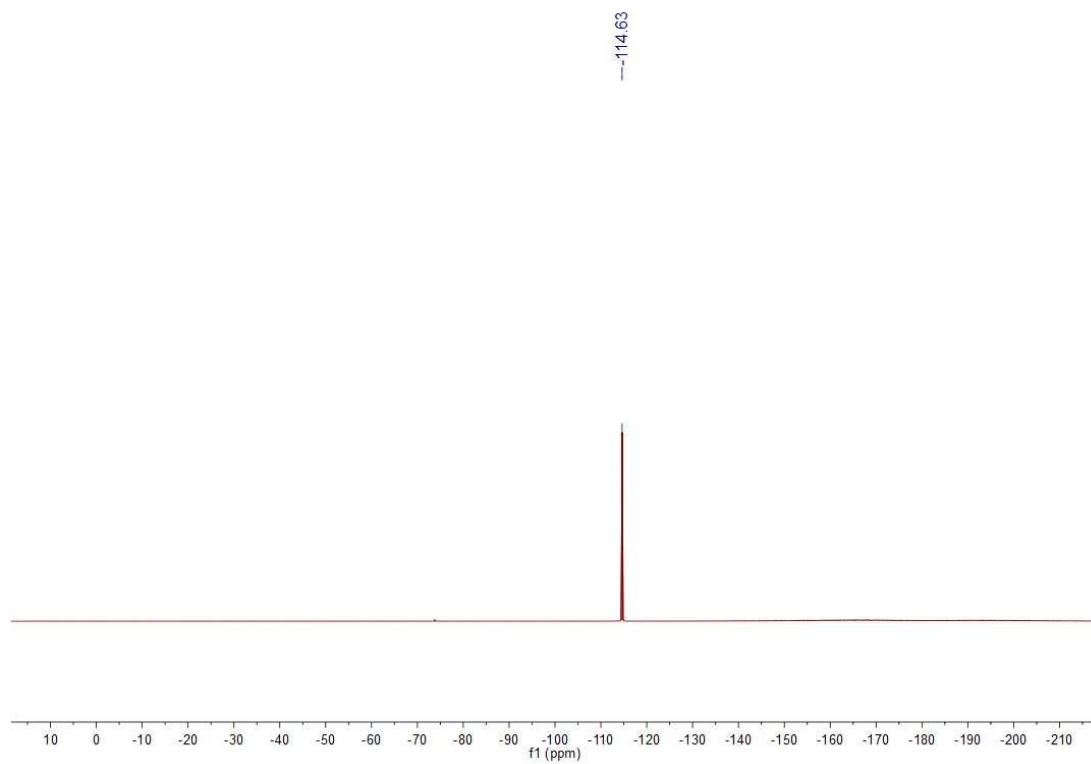

<sup>19</sup>F NMR spectrum of **3j** (376 MHz, CDCl<sub>3</sub>)

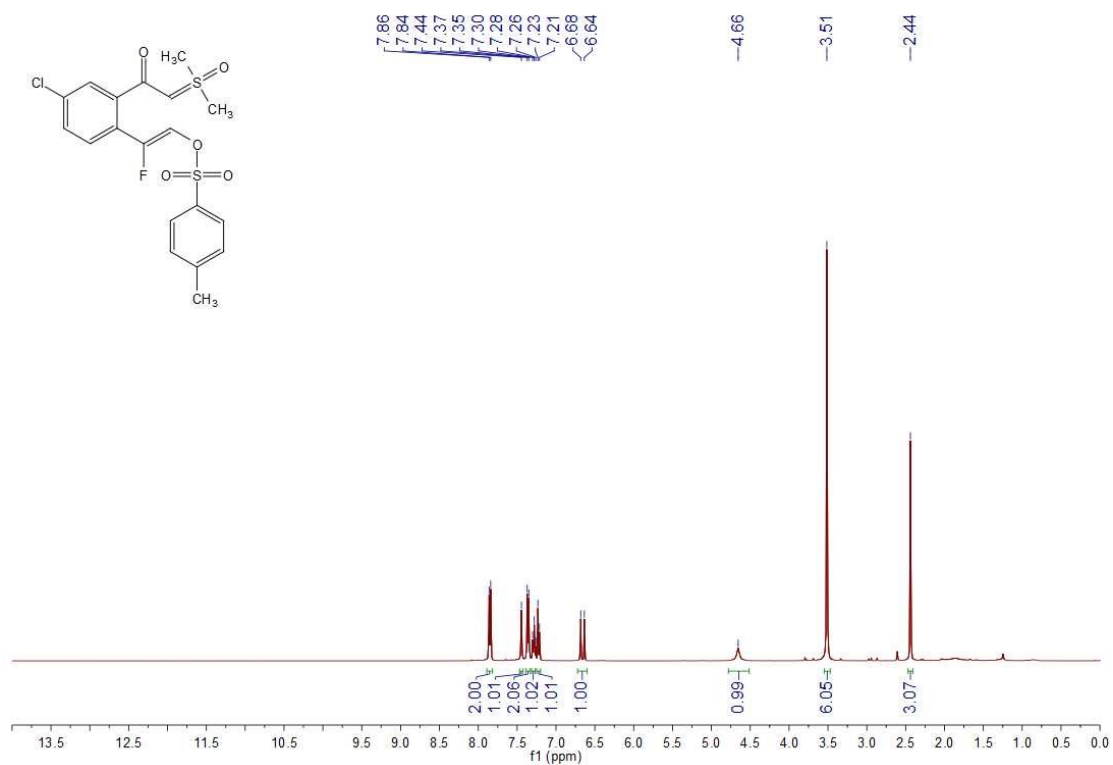

<sup>1</sup>H NMR spectrum of **3k** (400 MHz, CDCl<sub>3</sub>)

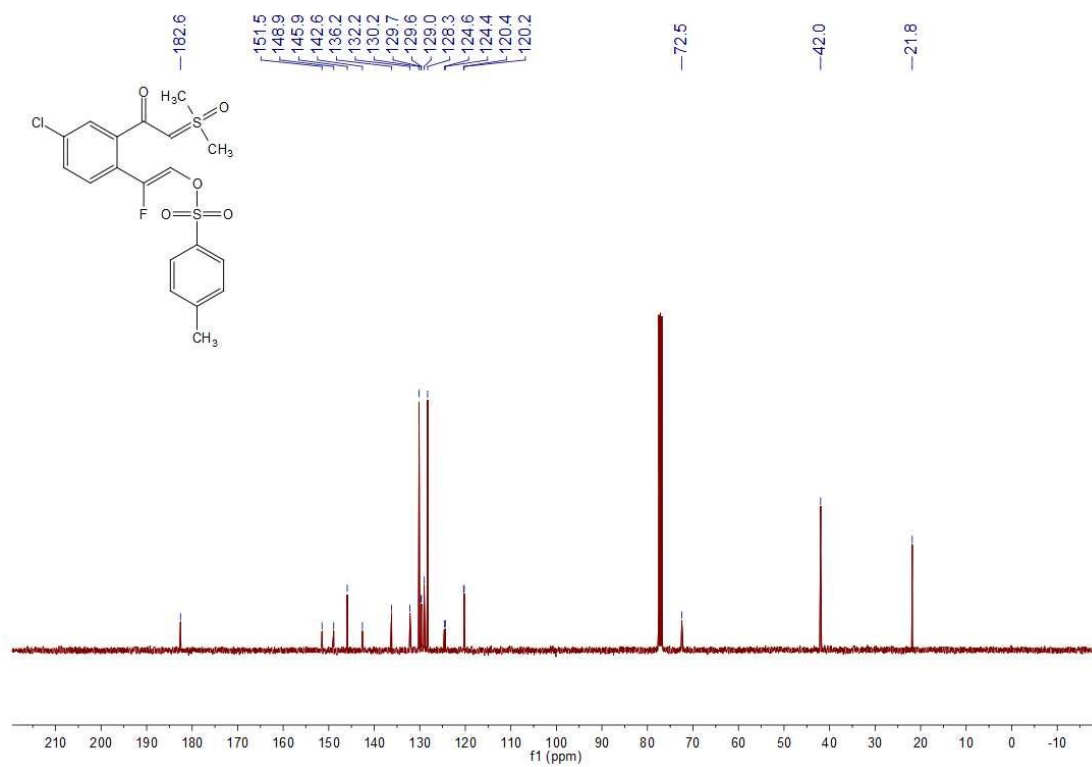

<sup>13</sup>C NMR spectrum of **3k** (101 MHz, CDCl<sub>3</sub>)

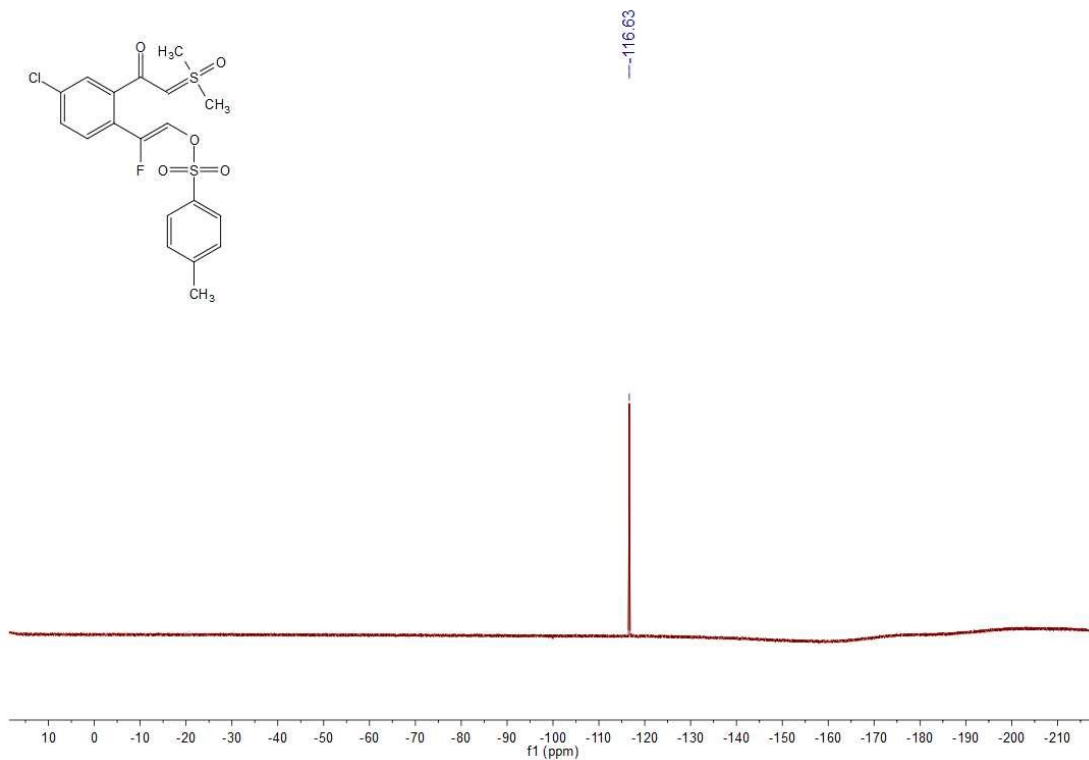

$^{19}\text{F}$  NMR spectrum of **3k** (376 MHz,  $\text{CDCl}_3$ )

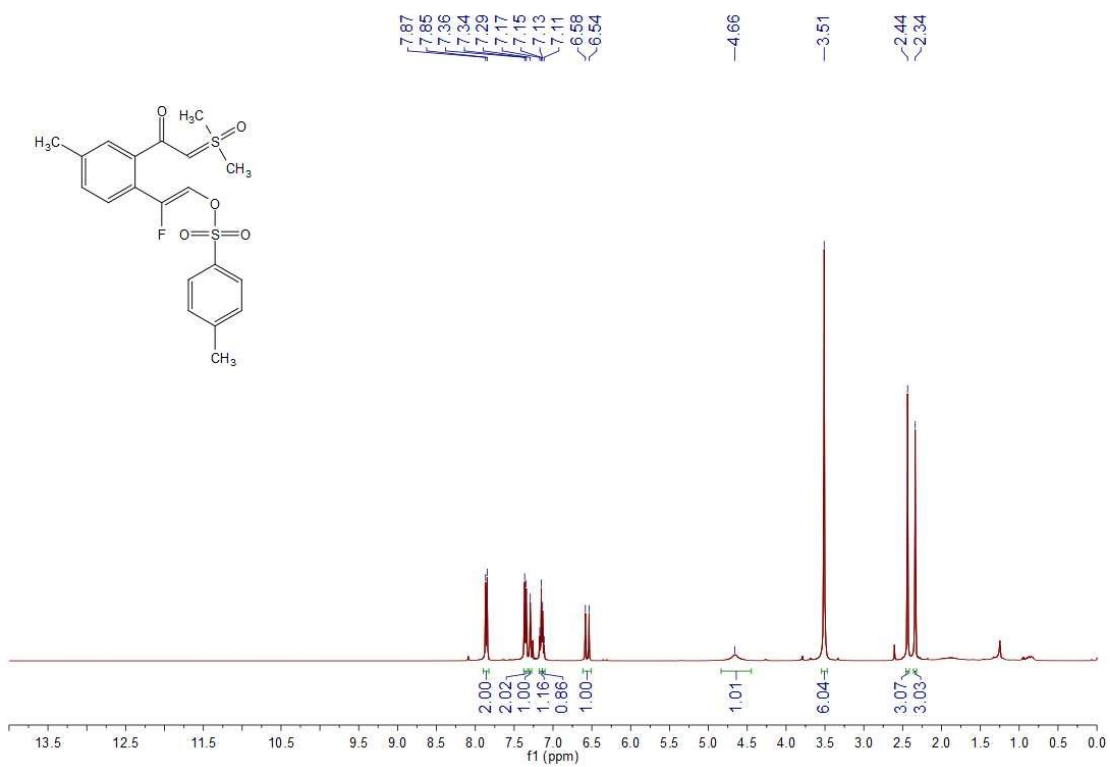

$^1\text{H}$  NMR spectrum of **3l** (400 MHz,  $\text{CDCl}_3$ )

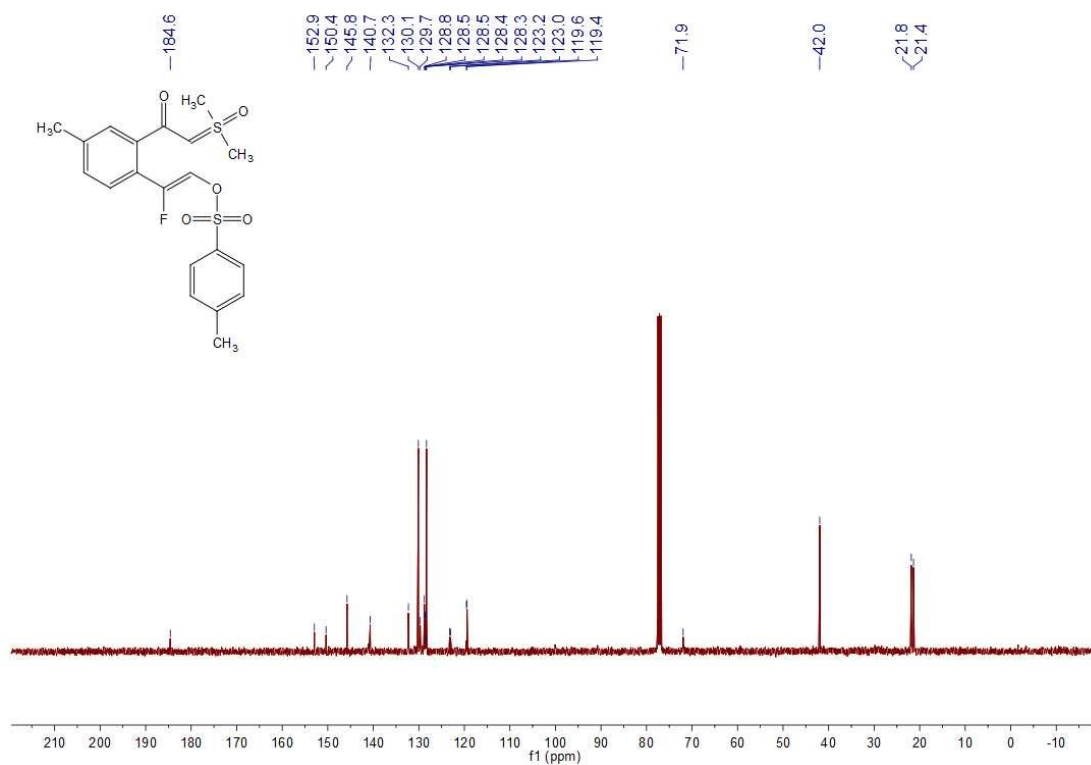

<sup>13</sup>C NMR spectrum of **3I** (101 MHz, CDCl<sub>3</sub>)

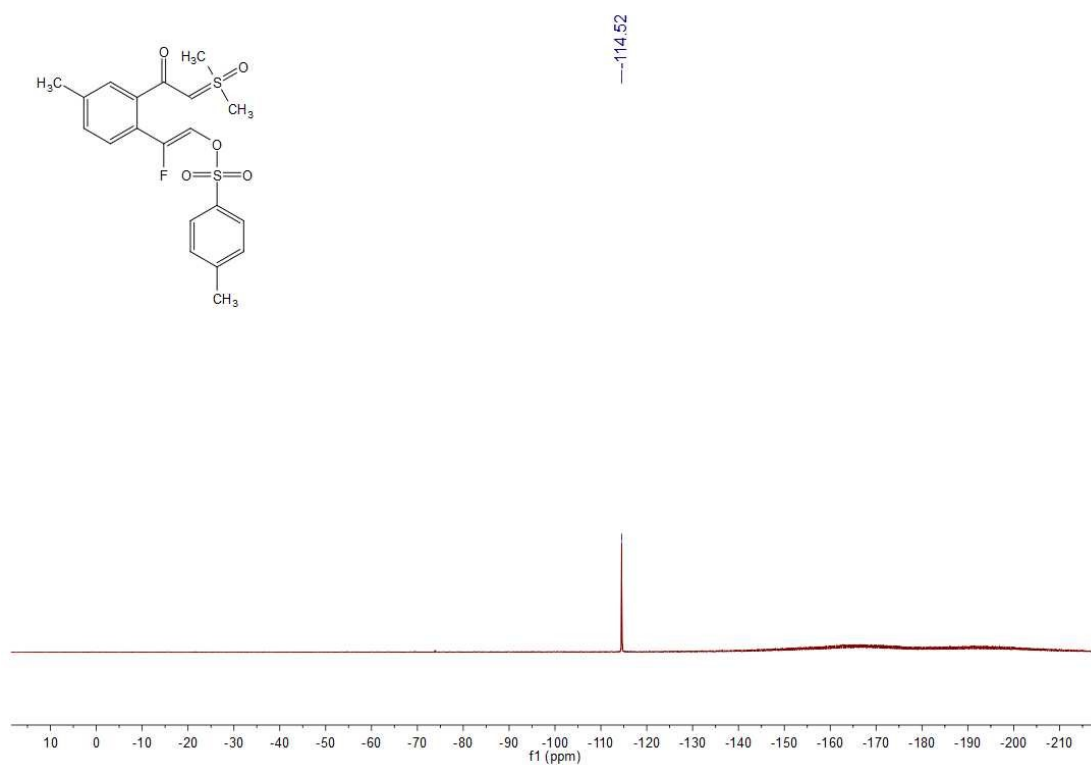

<sup>19</sup>F NMR spectrum of **3I** (376 MHz, CDCl<sub>3</sub>)

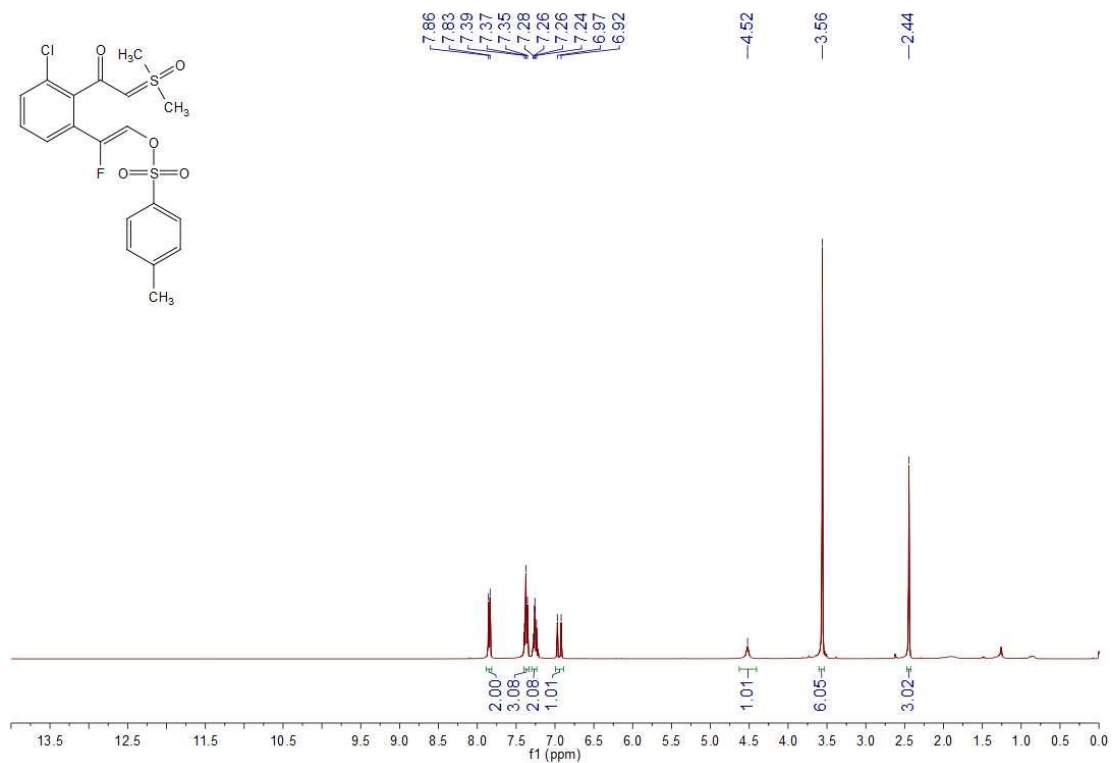

<sup>1</sup>H NMR spectrum of **3m** (400 MHz, CDCl<sub>3</sub>)

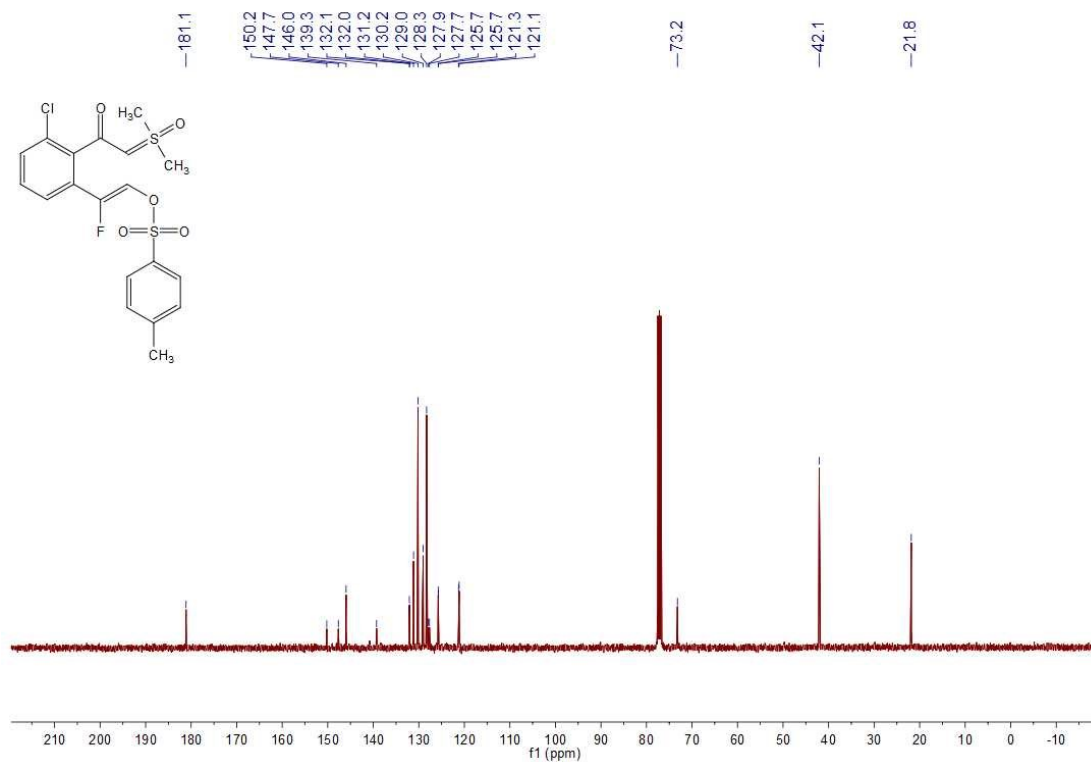

<sup>13</sup>C NMR spectrum of **3m** (101 MHz, CDCl<sub>3</sub>)

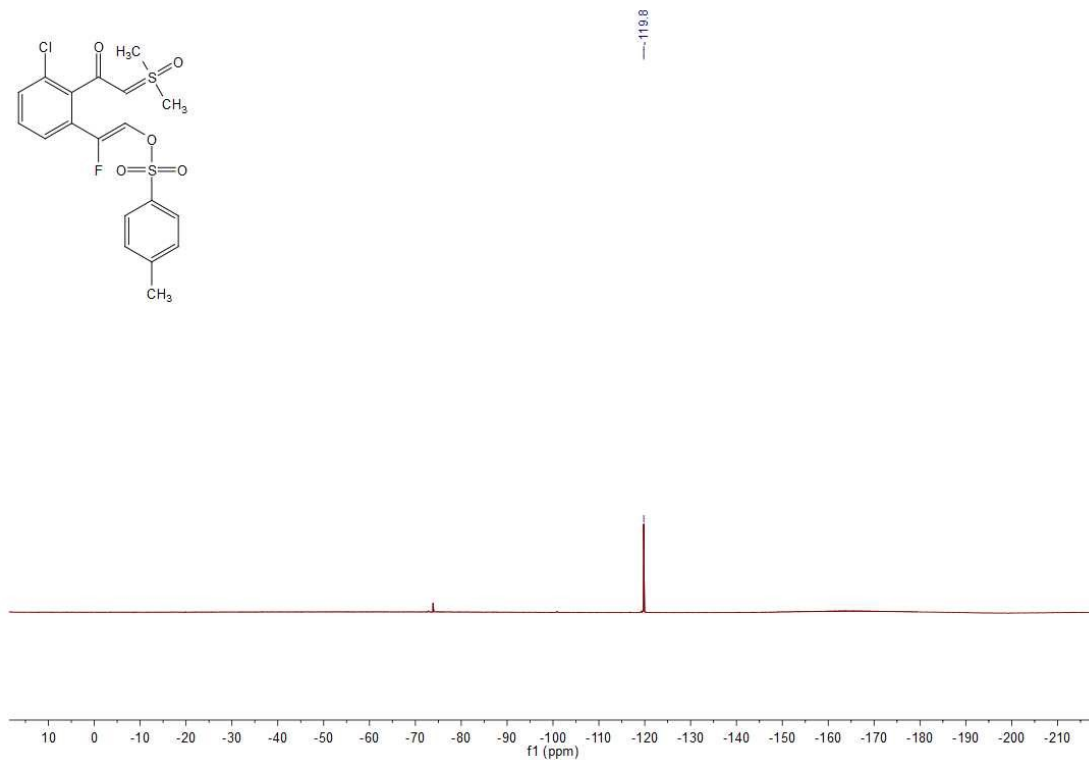

$^{19}\text{F}$  NMR spectrum of **3m** (376 MHz,  $\text{CDCl}_3$ )

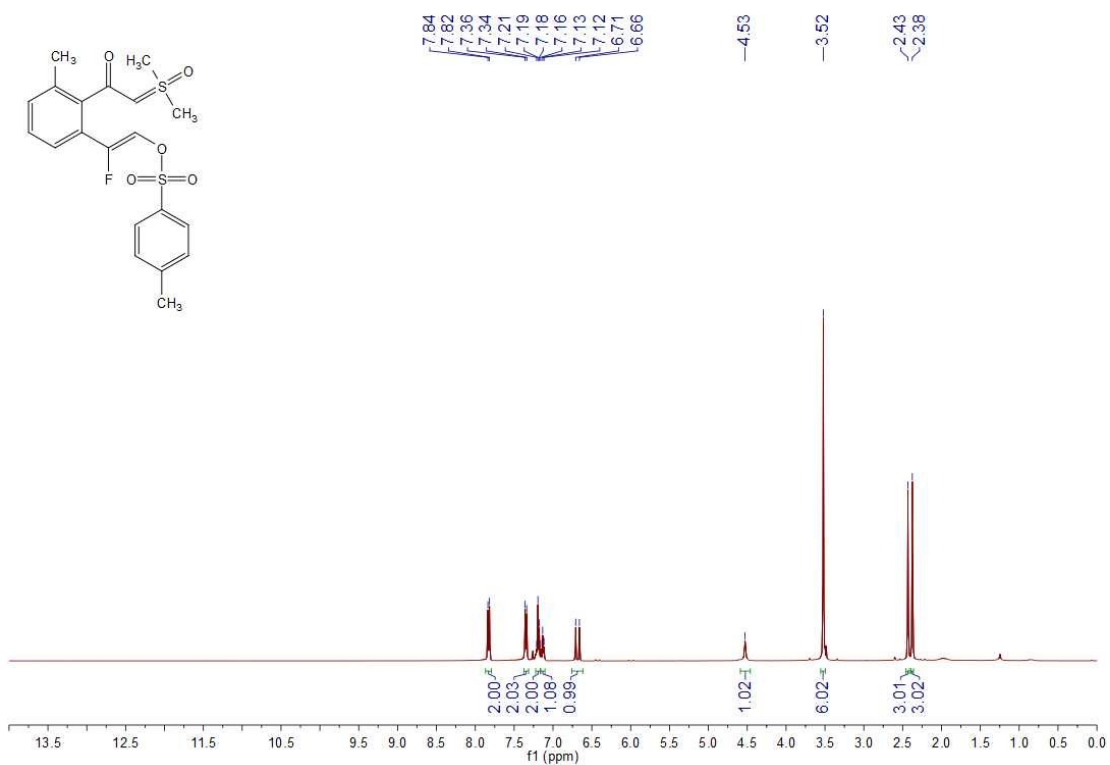

$^1\text{H}$  NMR spectrum of **3n** (400 MHz,  $\text{CDCl}_3$ )



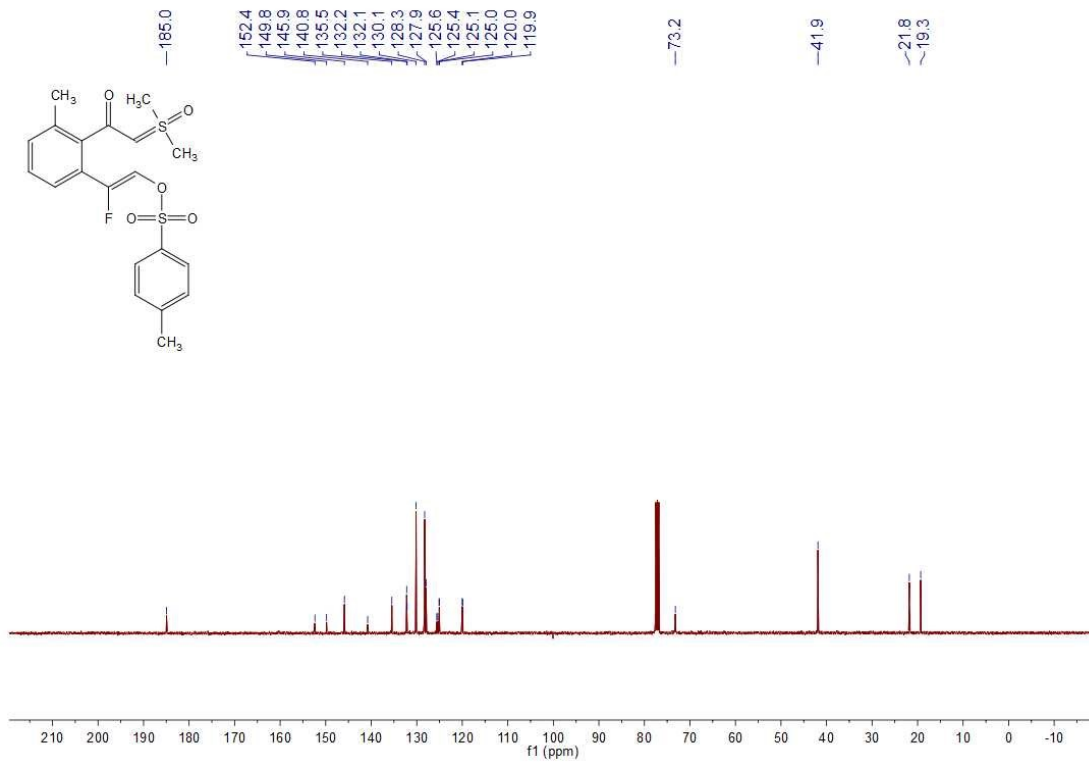

$^{13}\text{C}$  NMR spectrum of **3n** (101 MHz,  $\text{CDCl}_3$ )

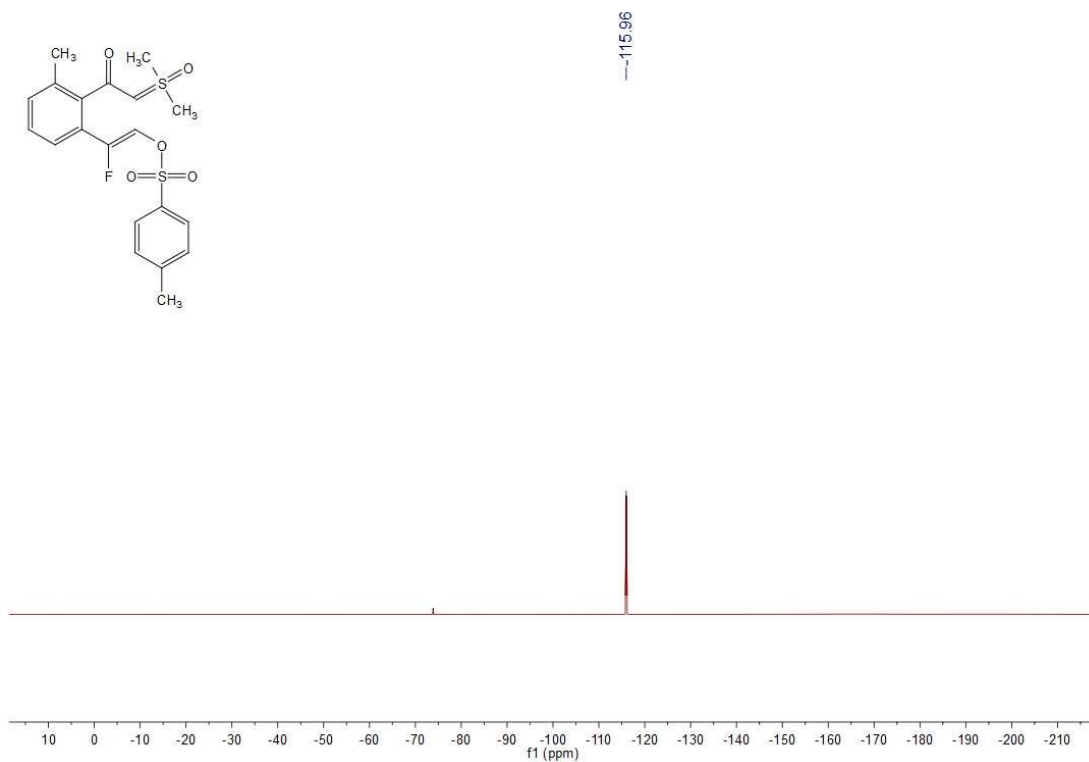

$^{19}\text{F}$  NMR spectrum of **3n** (376 MHz,  $\text{CDCl}_3$ )

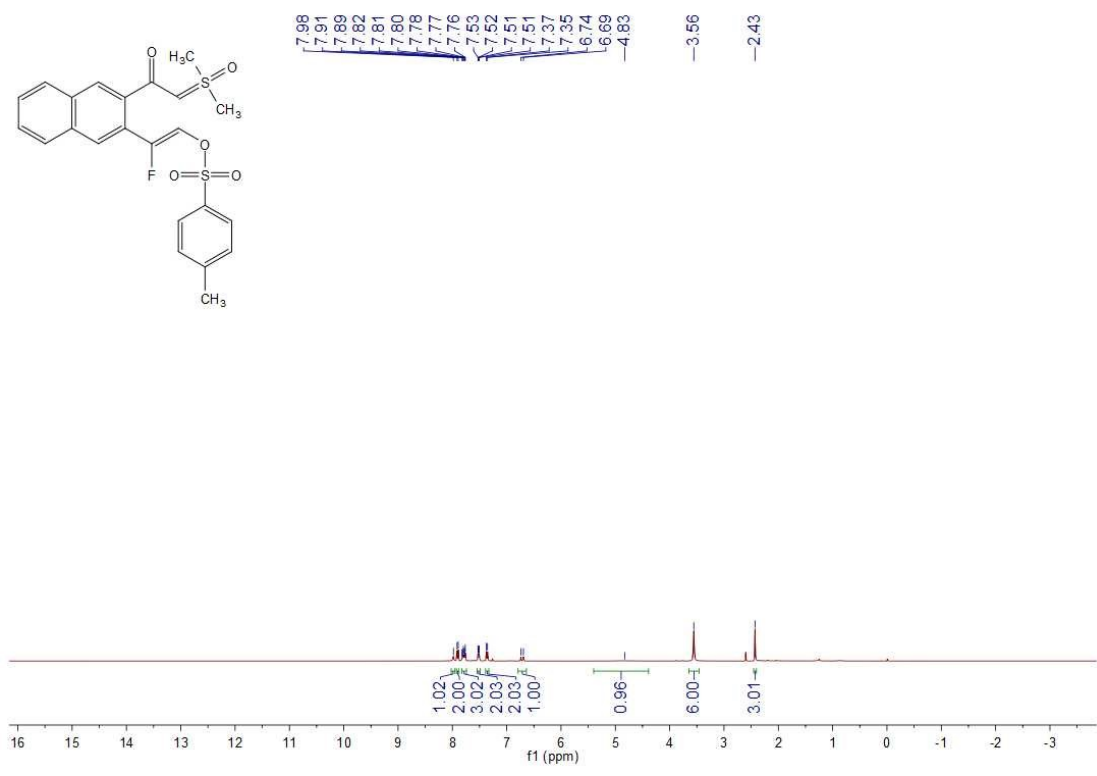

**<sup>1</sup>H NMR spectrum of 3o (400 MHz, CDCl<sub>3</sub>)**

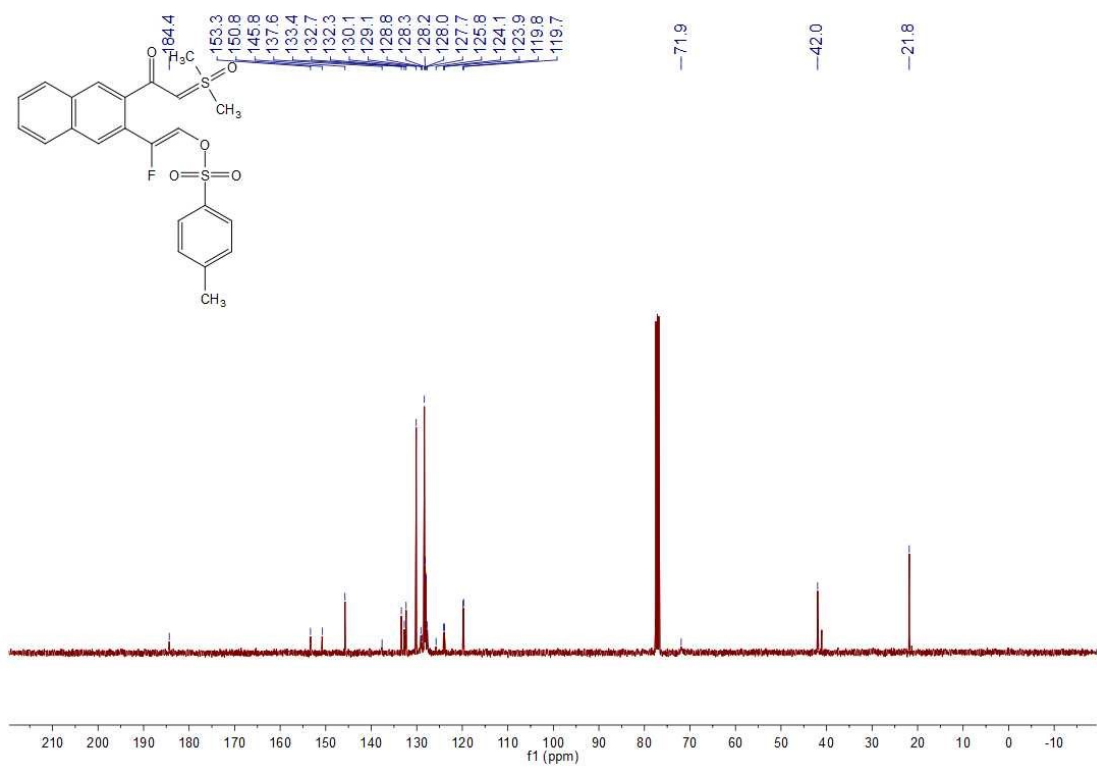

**<sup>13</sup>C NMR spectrum of 3o (101 MHz, CDCl<sub>3</sub>)**

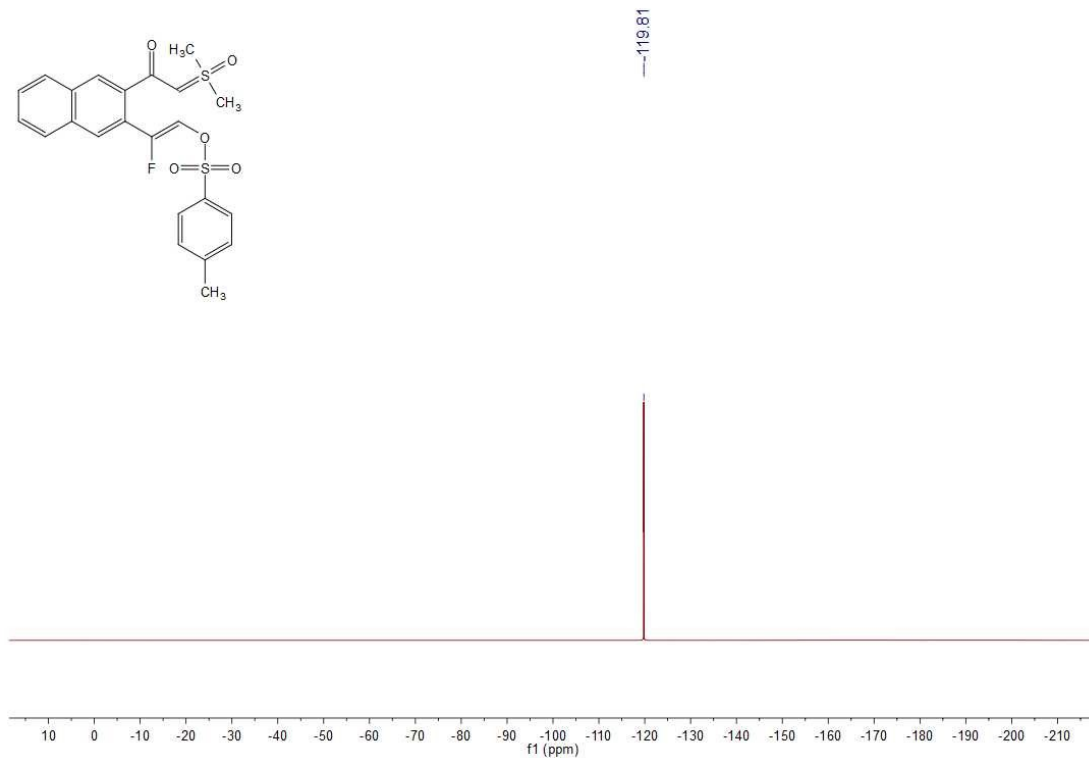

$^{19}\text{F}$  NMR spectrum of **3o** (376 MHz,  $\text{CDCl}_3$ )

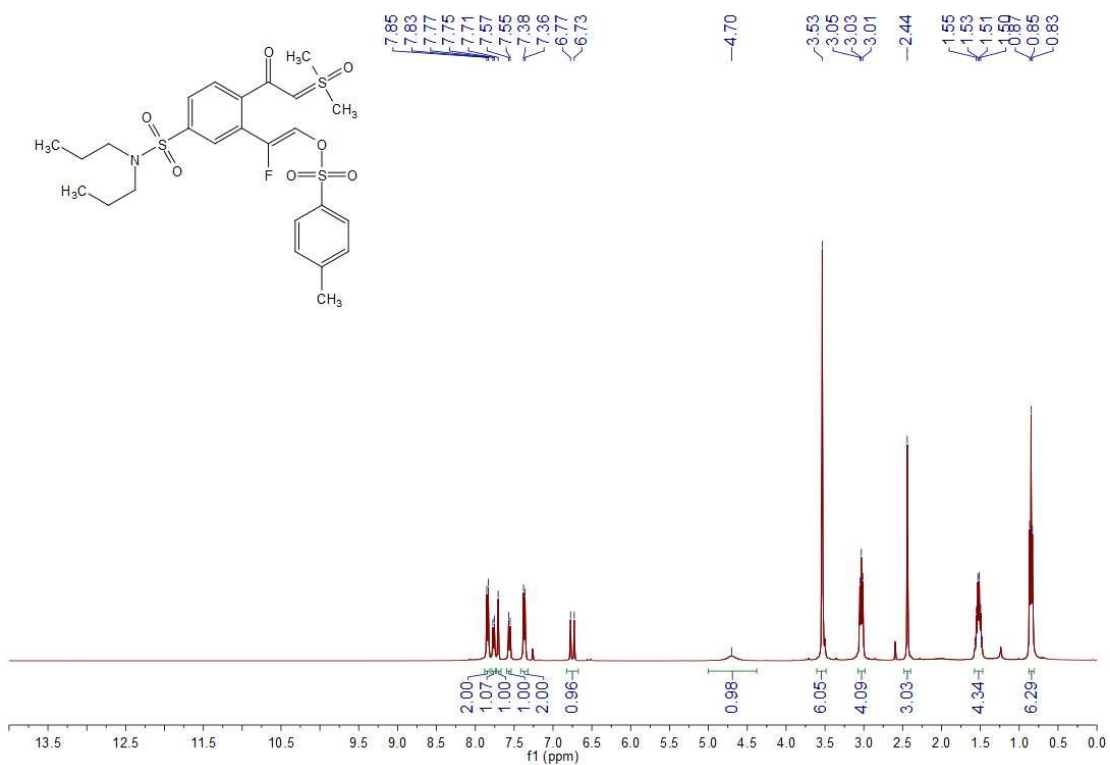

$^1\text{H}$  NMR spectrum of **3p** (400 MHz,  $\text{CDCl}_3$ )

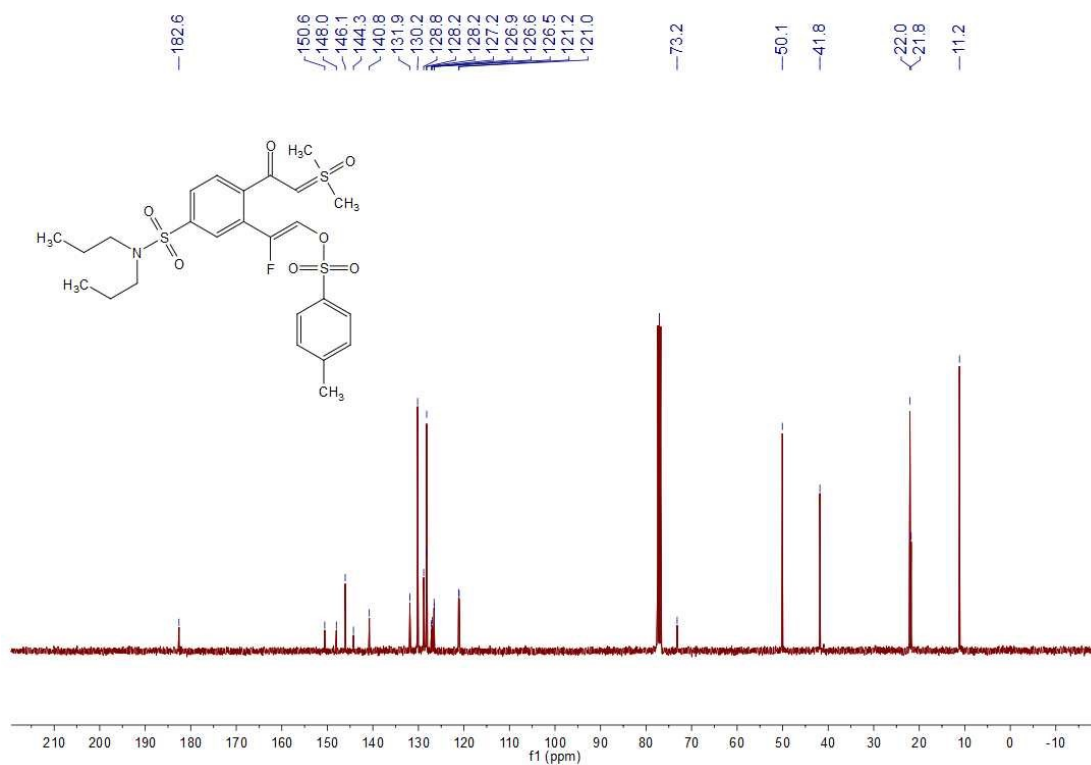

$^{13}\text{C}$  NMR spectrum of **3p** (101 MHz,  $\text{CDCl}_3$ )

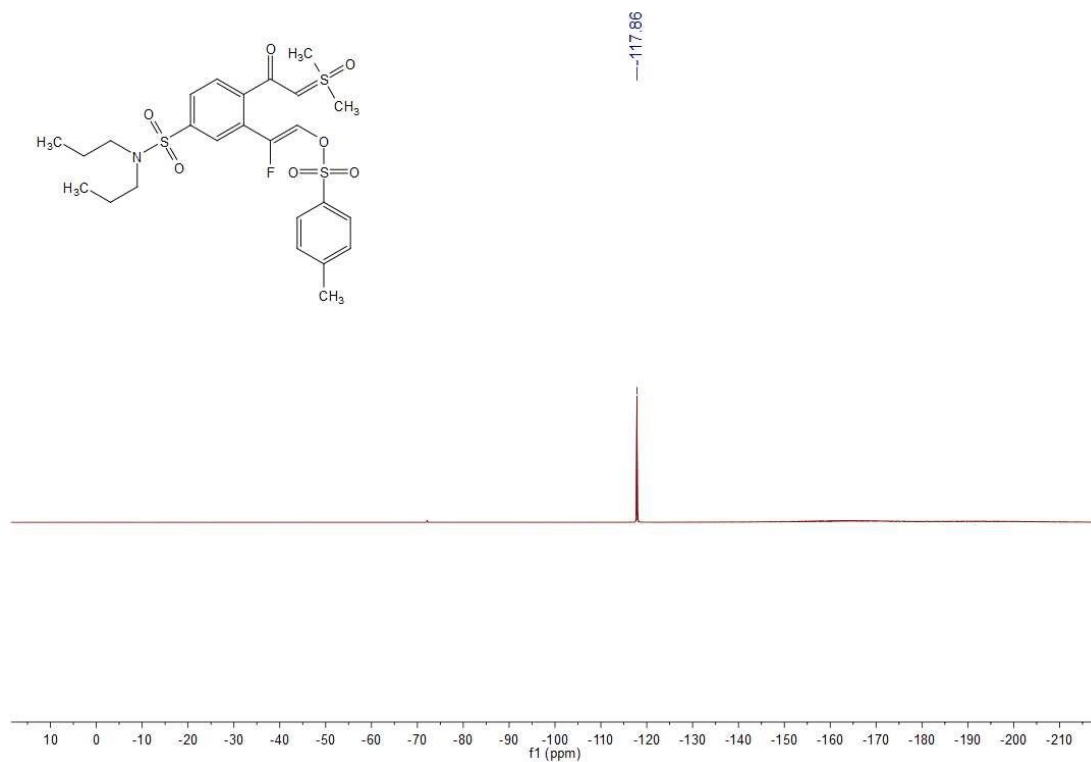

$^{19}\text{F}$  NMR spectrum of **3p** (376 MHz,  $\text{CDCl}_3$ )

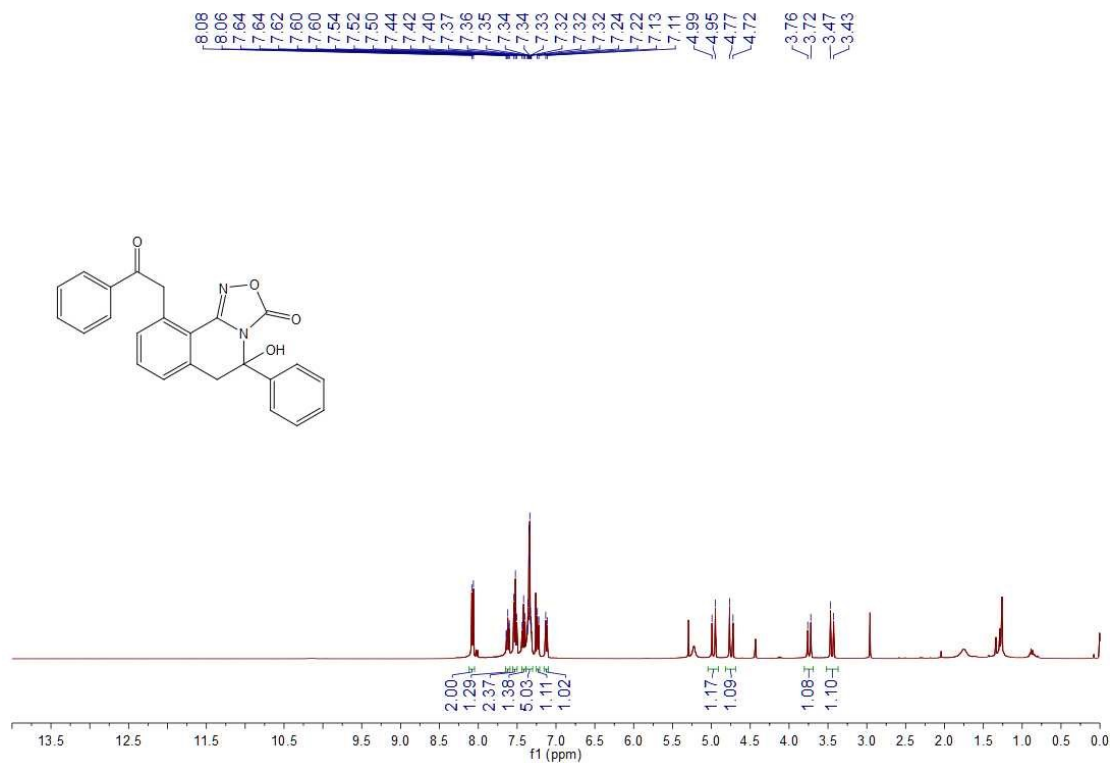

<sup>1</sup>H NMR spectrum of **5a** (400 MHz, CDCl<sub>3</sub>)

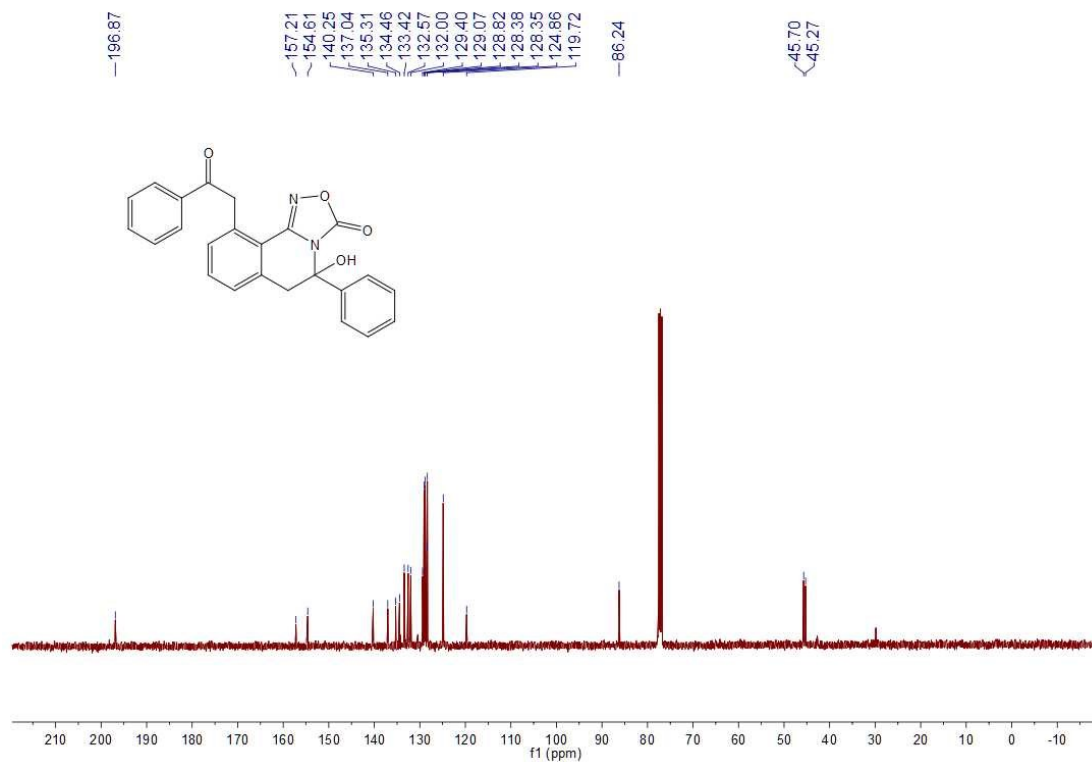

<sup>13</sup>C NMR spectrum of **5a** (101 MHz, CDCl<sub>3</sub>)

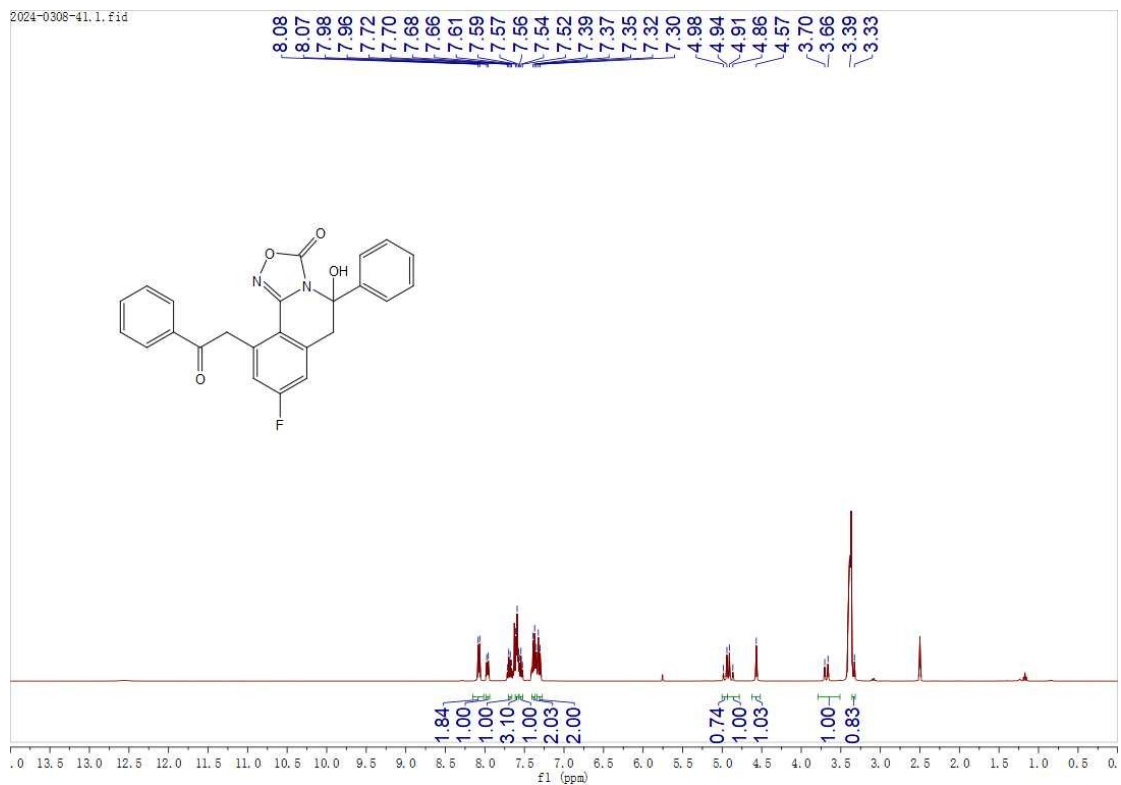

<sup>1</sup>H NMR spectrum of **5b** (400 MHz, CDCl<sub>3</sub>)

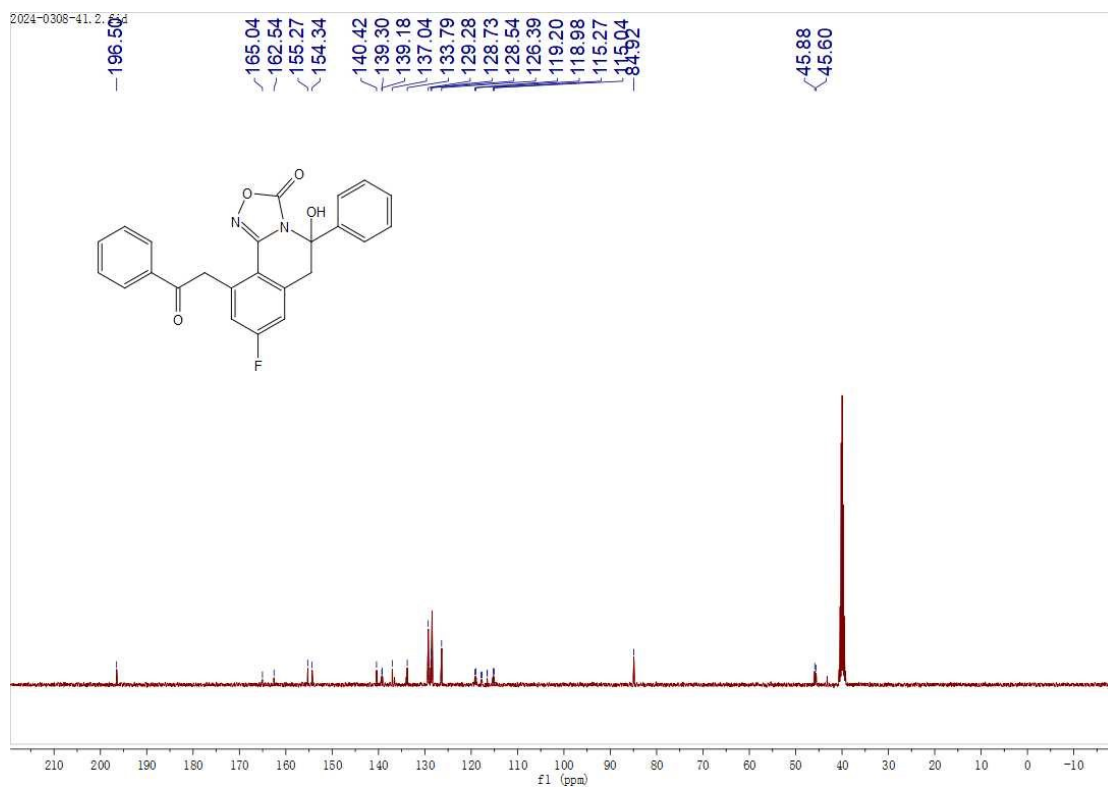

<sup>13</sup>C NMR spectrum of **5b** (101 MHz, CDCl<sub>3</sub>)

20240614-10

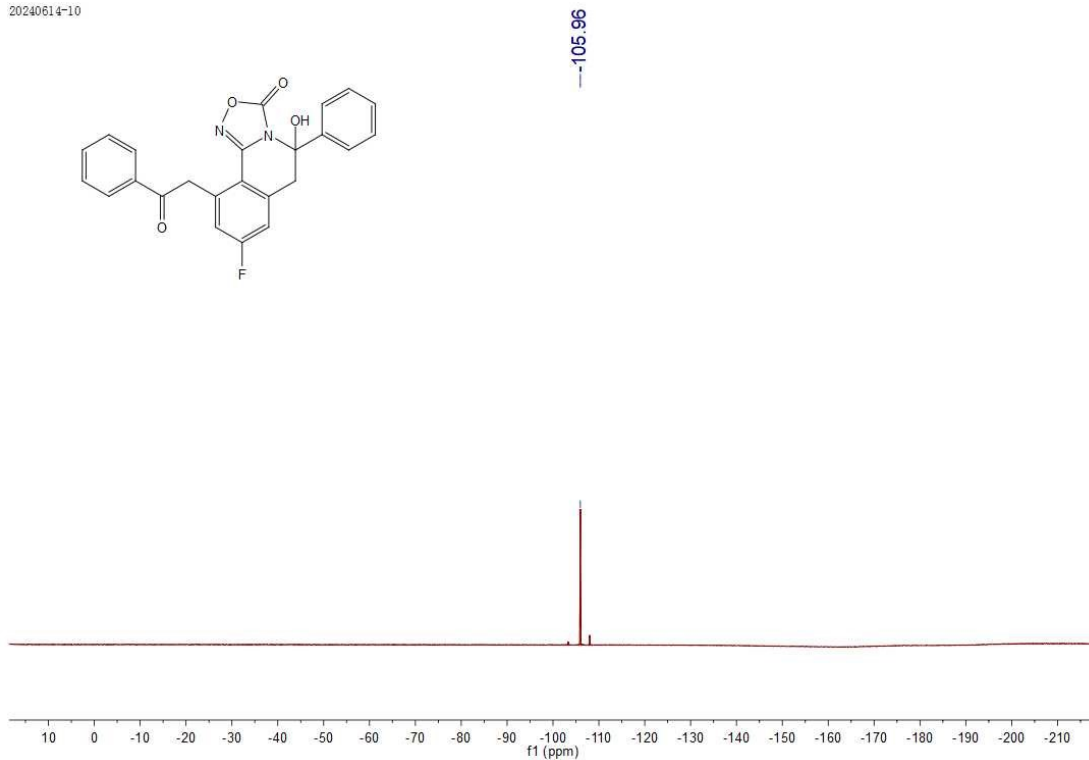 $^{19}\text{F}$  NMR spectrum of **5b** (376 MHz,  $\text{CDCl}_3$ )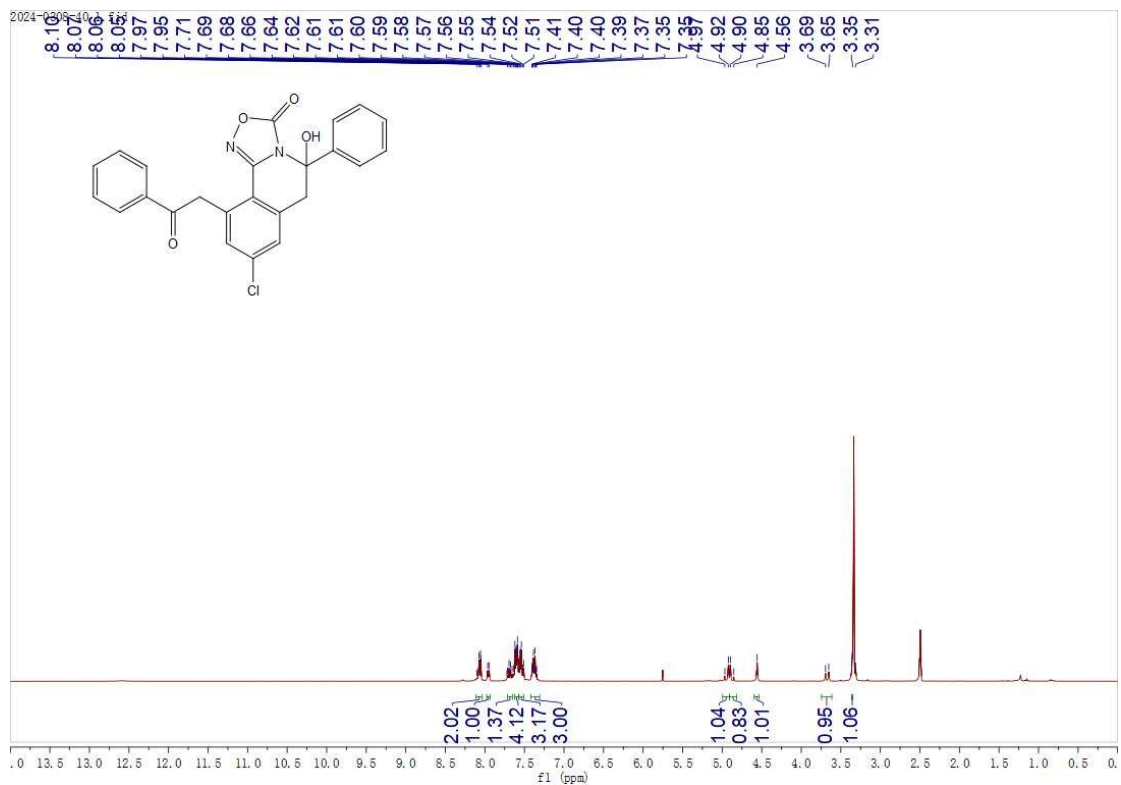 $^1\text{H}$  NMR spectrum of **5c** (400 MHz,  $\text{CDCl}_3$ )

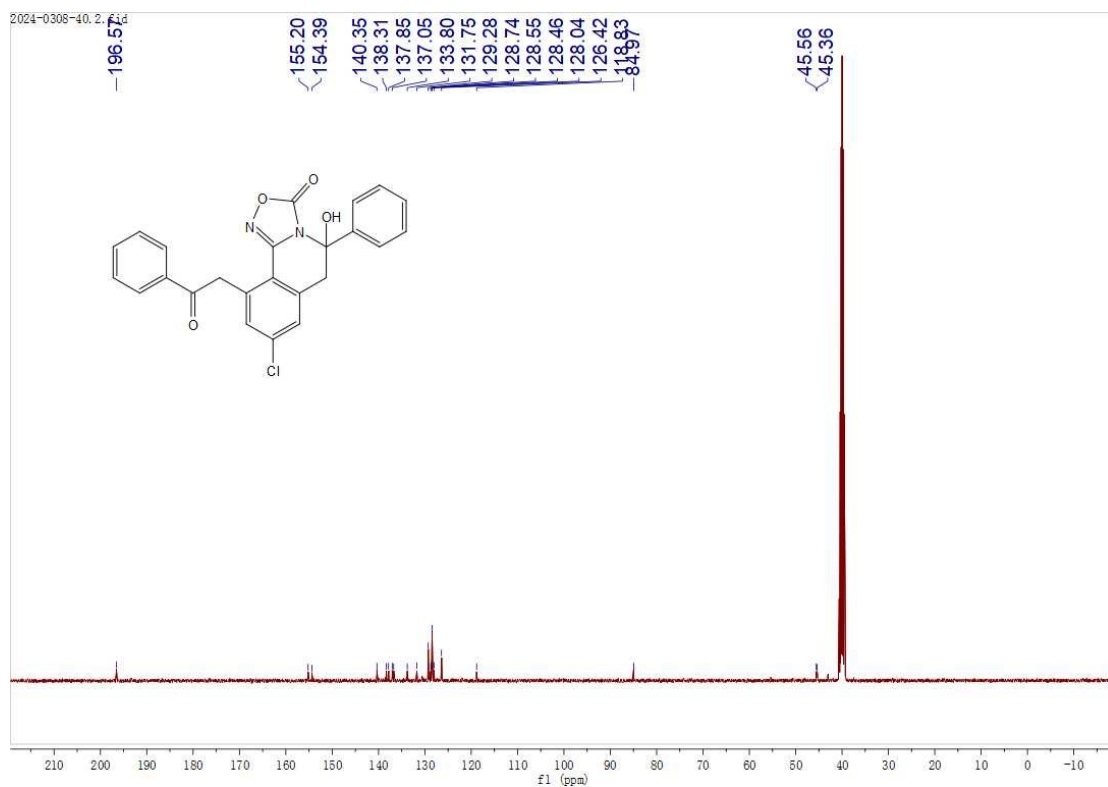

$^{13}\text{C}$  NMR spectrum of **5c** (101 MHz,  $\text{CDCl}_3$ )

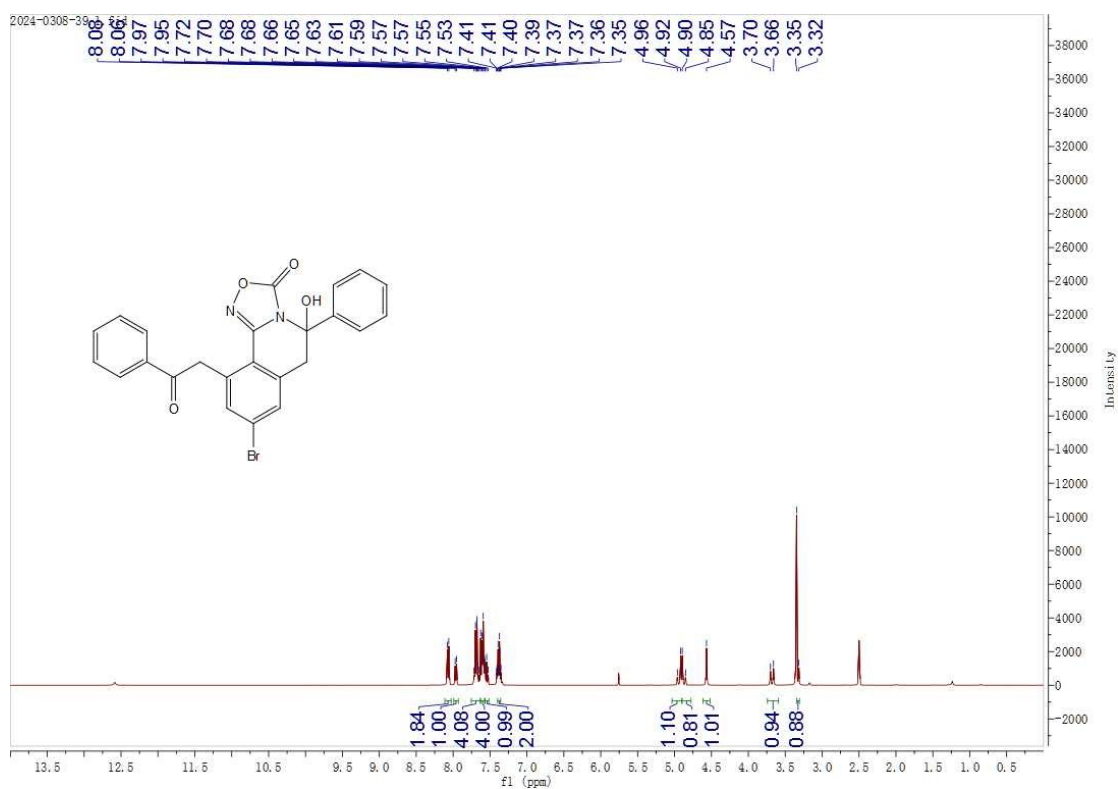

$^1\text{H}$  NMR spectrum of **5d** (400 MHz,  $\text{CDCl}_3$ )



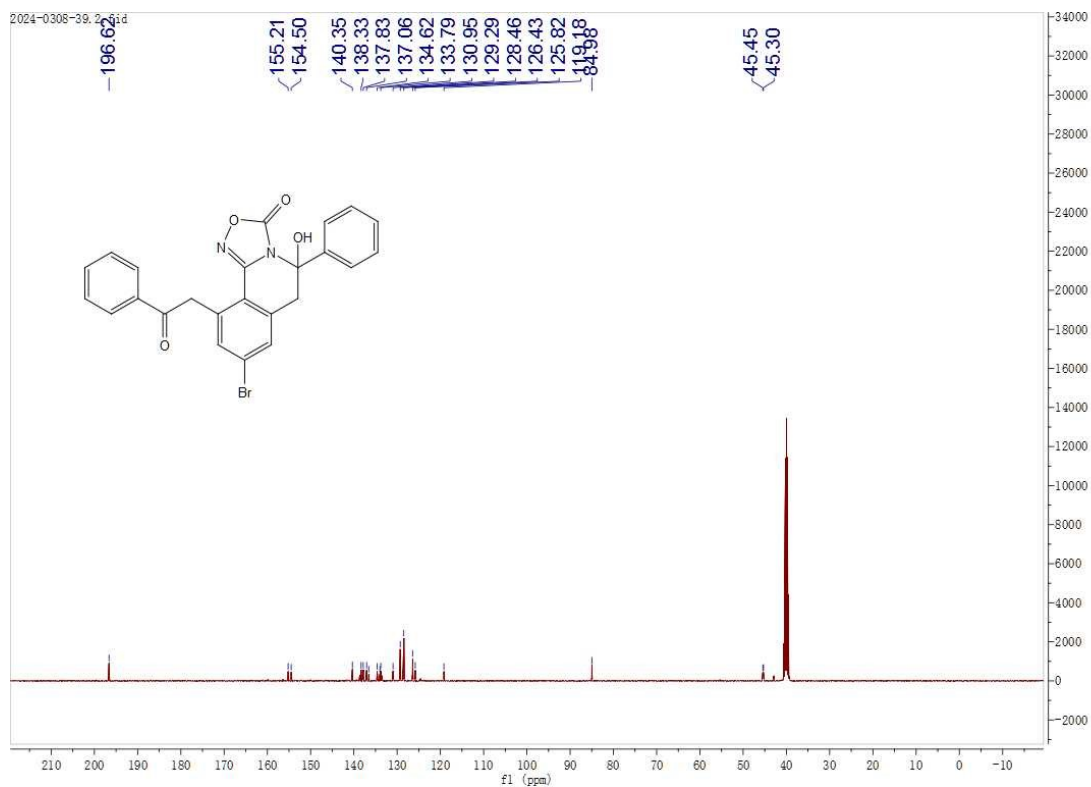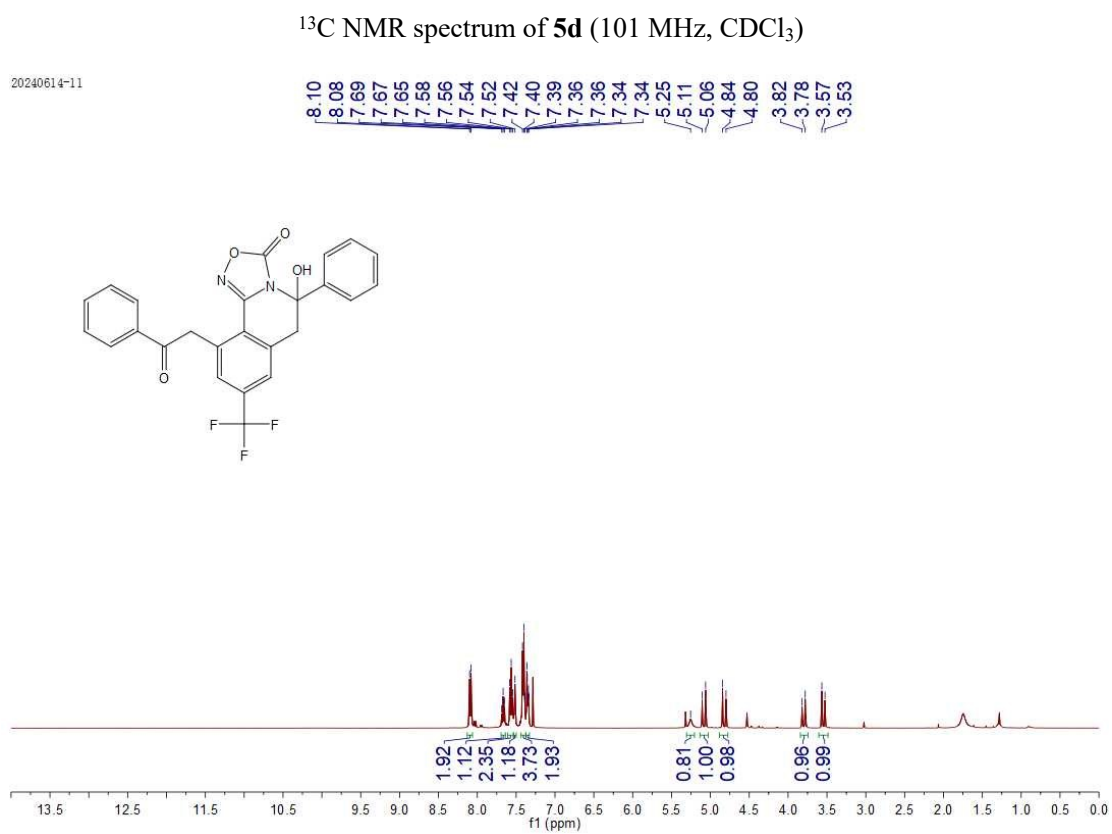

20240614-11

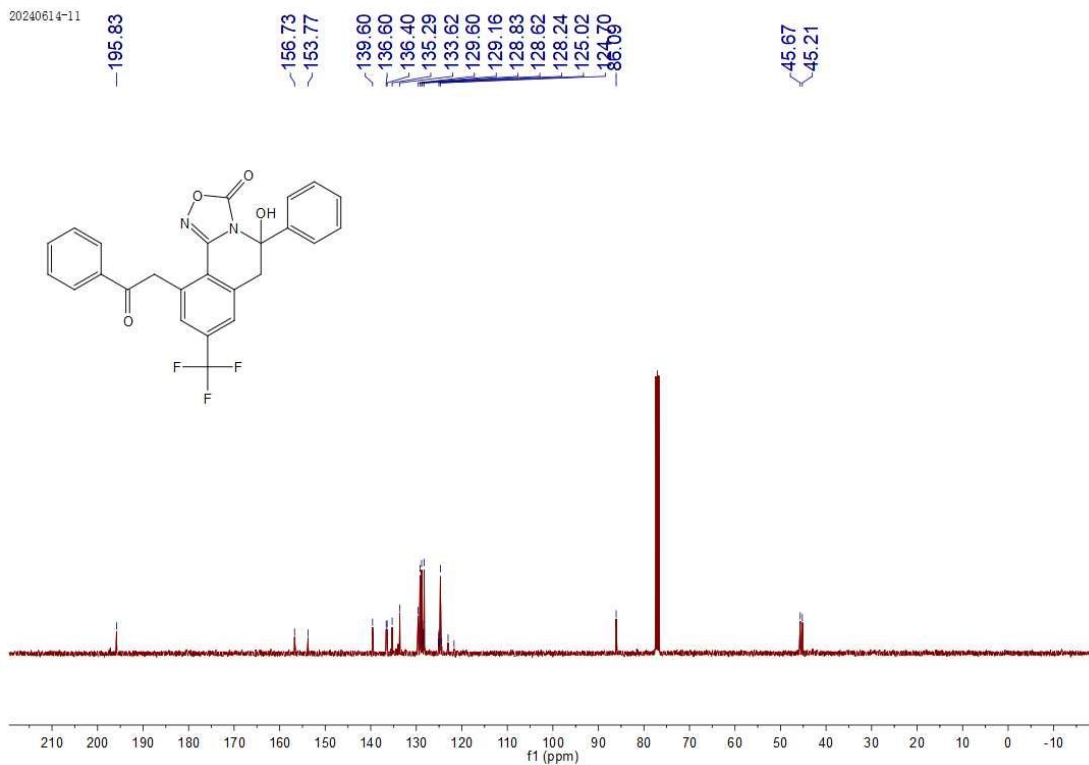

<sup>13</sup>C NMR spectrum of **5e** (101 MHz, CDCl<sub>3</sub>)

20240614-11

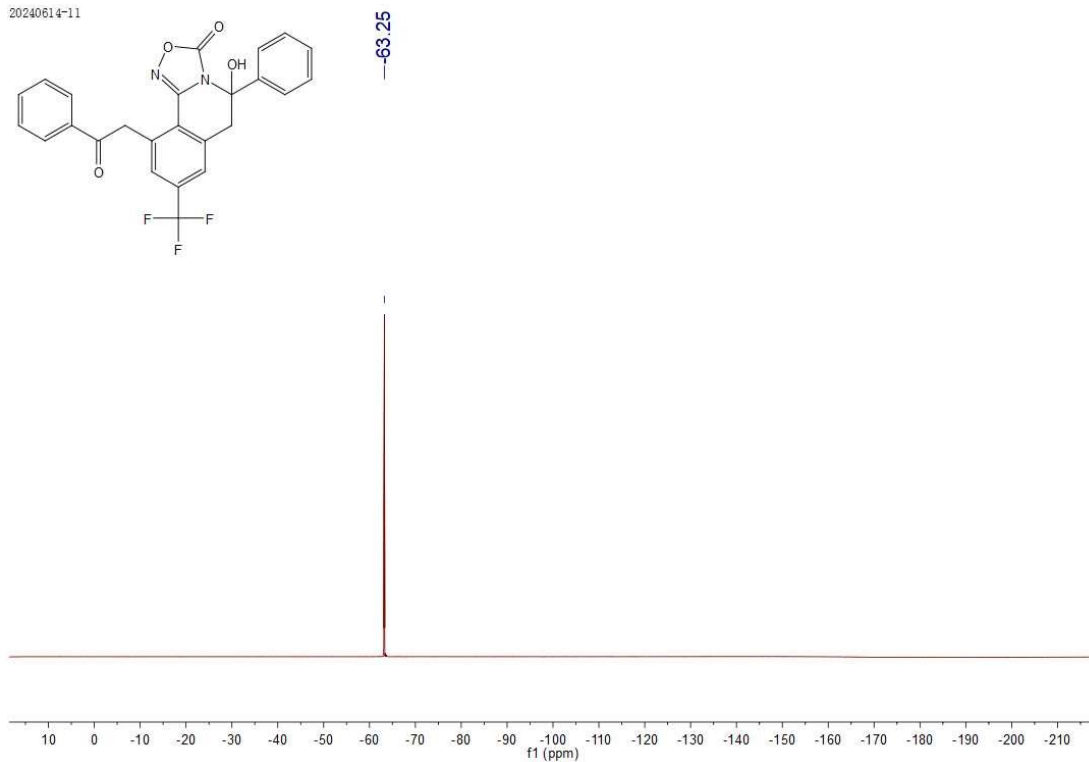

<sup>19</sup>F NMR spectrum of **5e** (376 MHz, CDCl<sub>3</sub>)

20240628-04

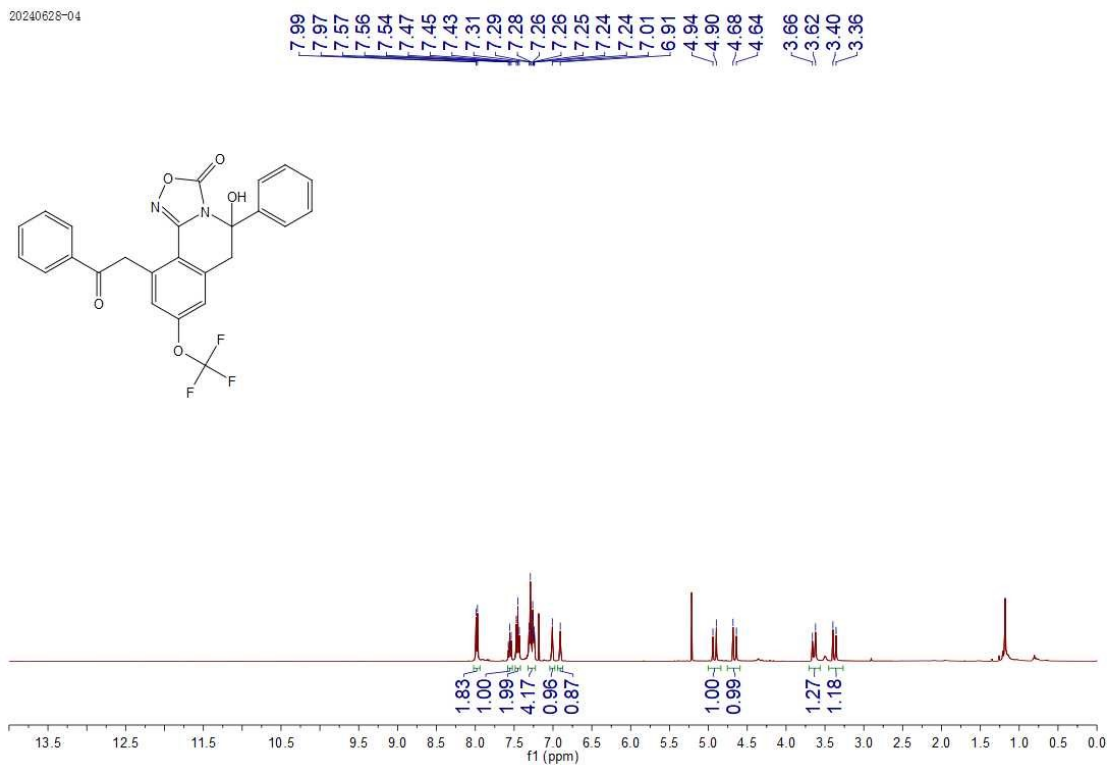<sup>1</sup>H NMR spectrum of **5f** (400 MHz, CDCl<sub>3</sub>)

20240628-04

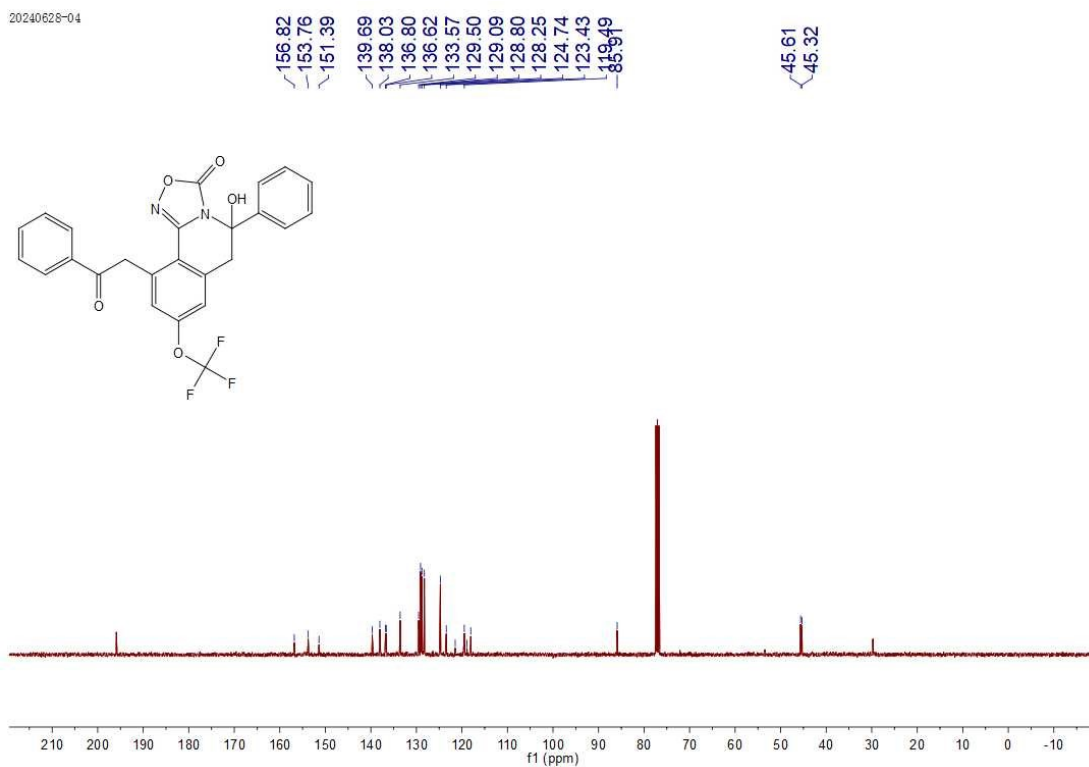<sup>13</sup>C NMR spectrum of **5f** (101 MHz, CDCl<sub>3</sub>)

20240628-04

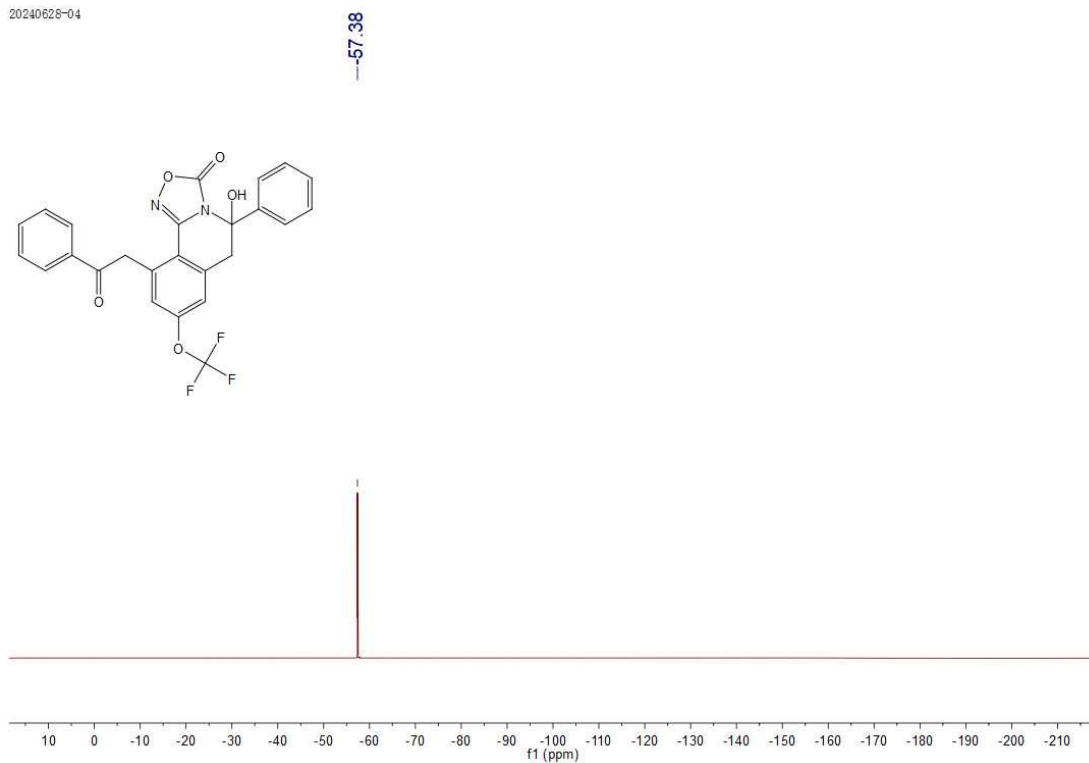

$^{19}\text{F}$  NMR spectrum of **5f** (376 MHz,  $\text{CDCl}_3$ )

20240608-24

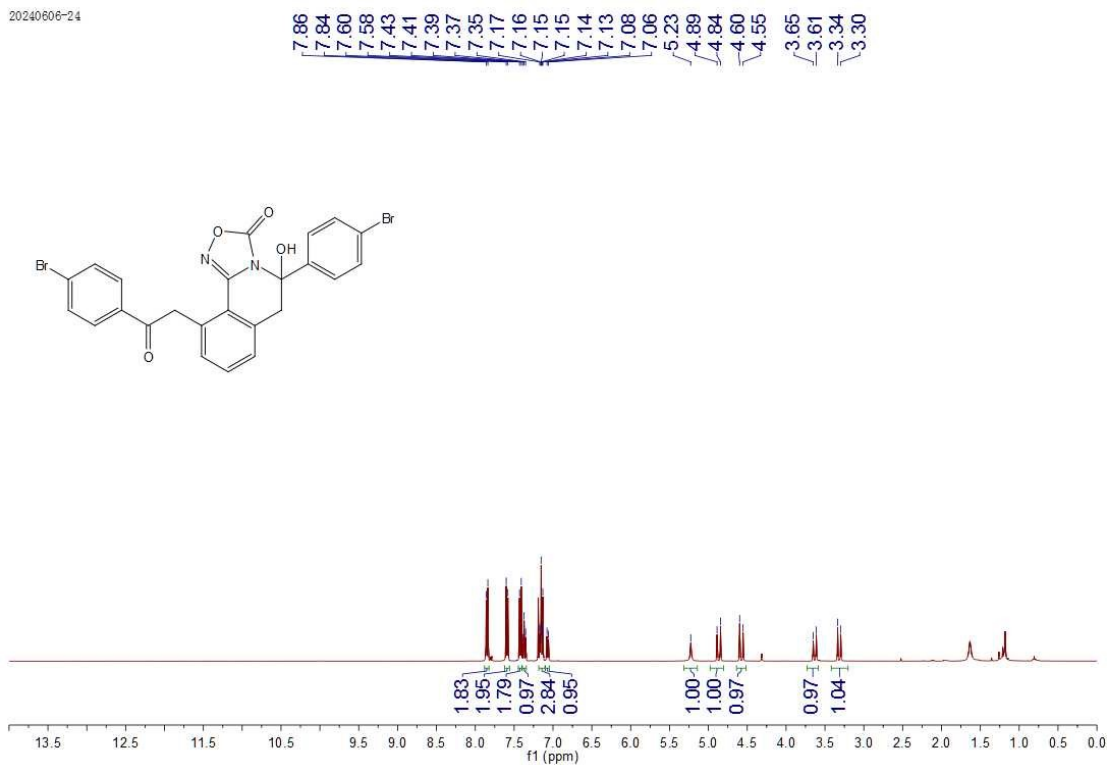

$^1\text{H}$  NMR spectrum of **5g** (400 MHz,  $\text{CDCl}_3$ )

20240606-24

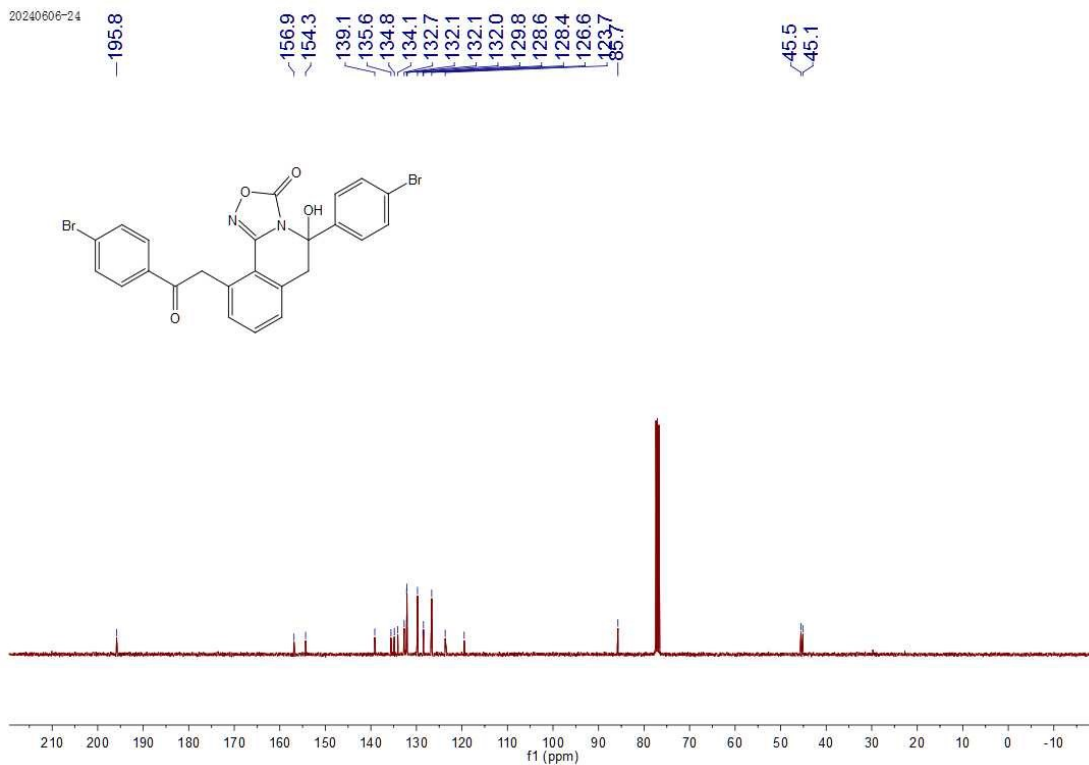

<sup>13</sup>C NMR spectrum of **5g** (101 MHz, CDCl<sub>3</sub>)

20240621-18

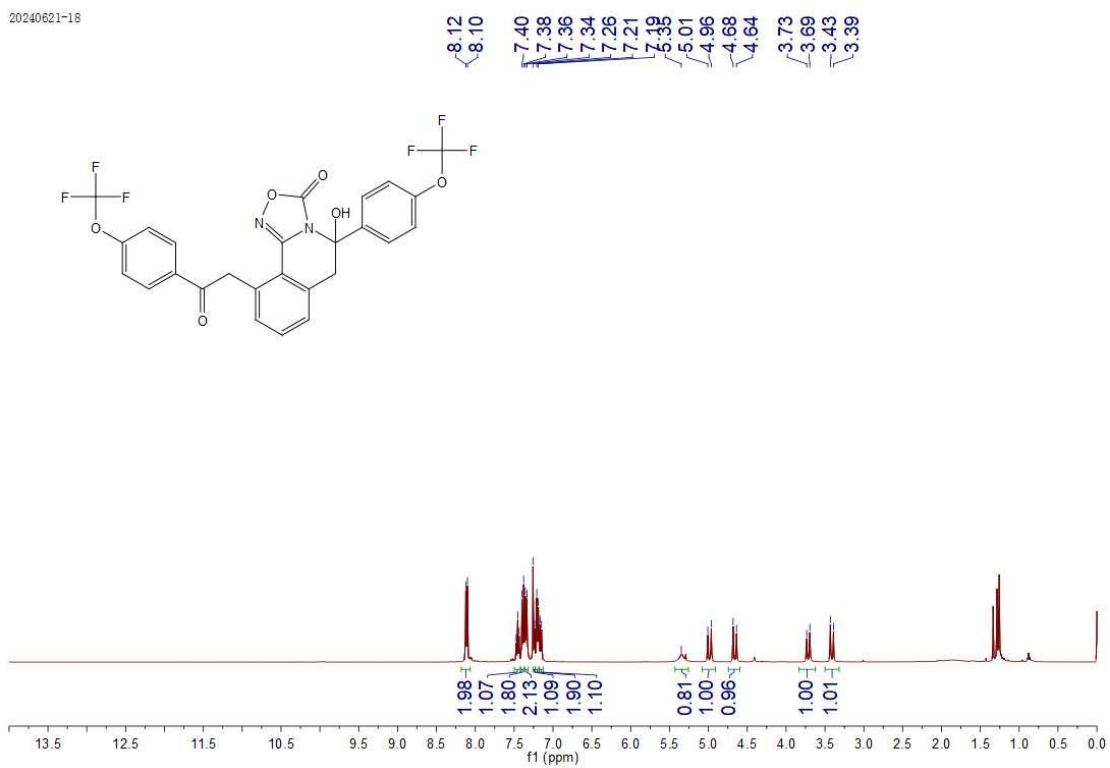

<sup>1</sup>H NMR spectrum of **5h** (400 MHz, CDCl<sub>3</sub>)

20240621-18

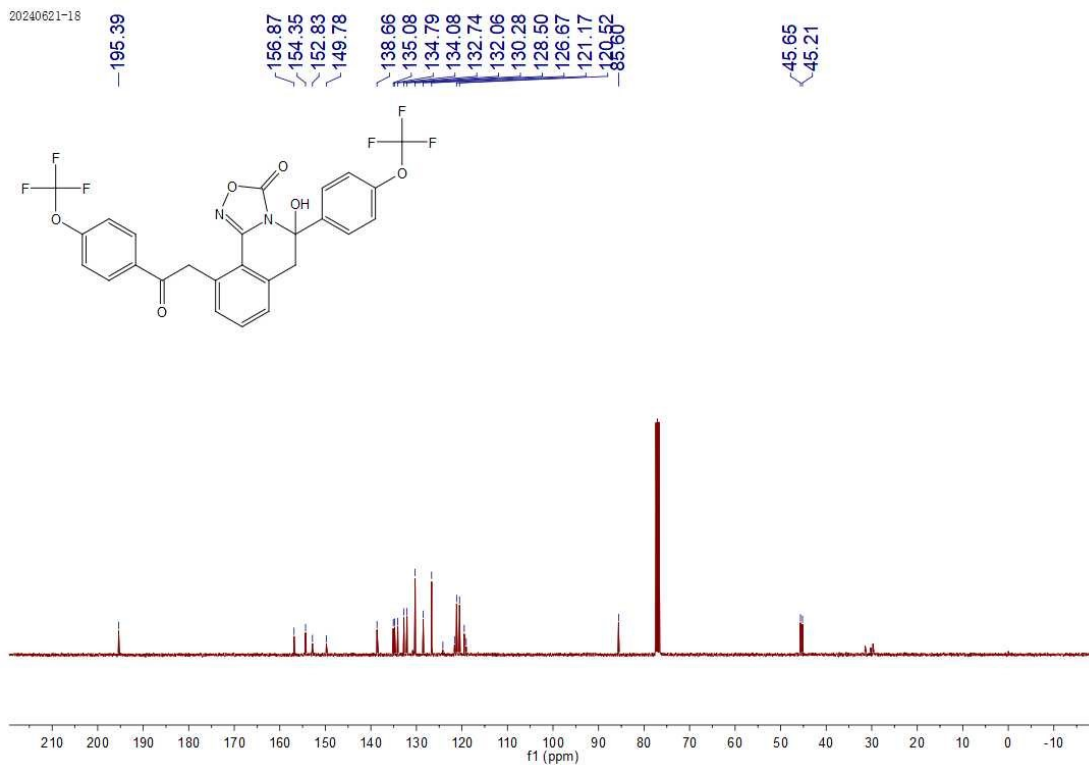

$^{13}\text{C}$  NMR spectrum of **5h** (101 MHz,  $\text{CDCl}_3$ )

20240621-18

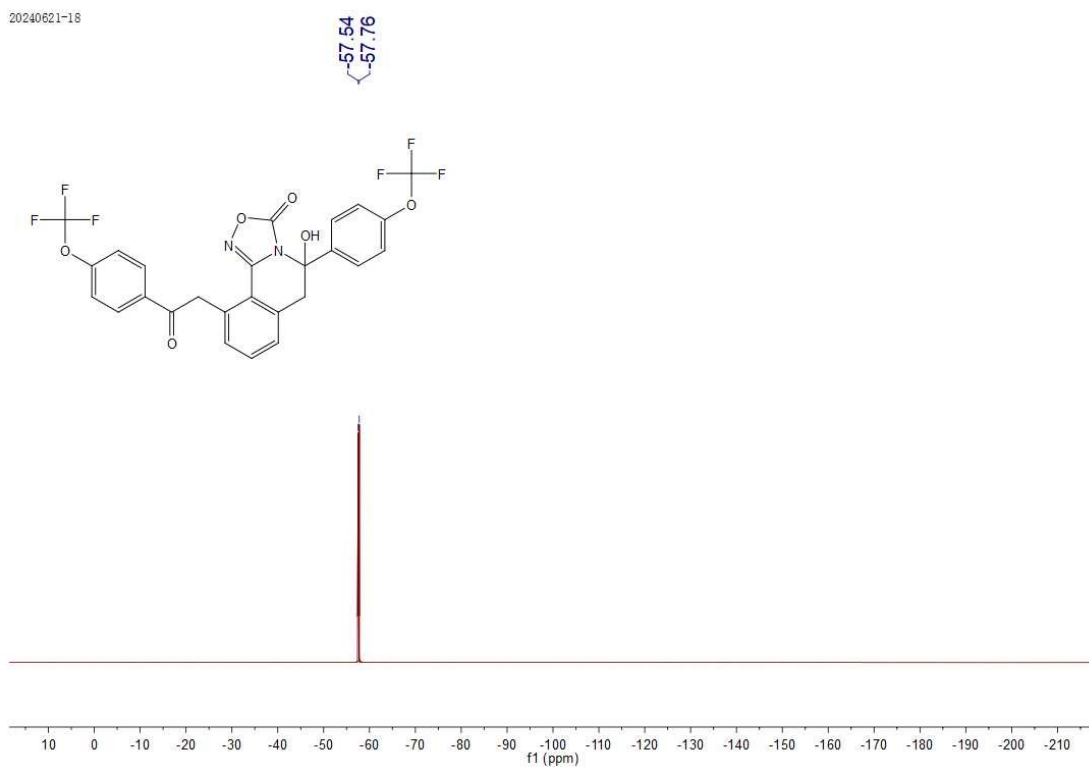

$^{19}\text{F}$  NMR spectrum of **5h** (376 MHz,  $\text{CDCl}_3$ )

20240621-17

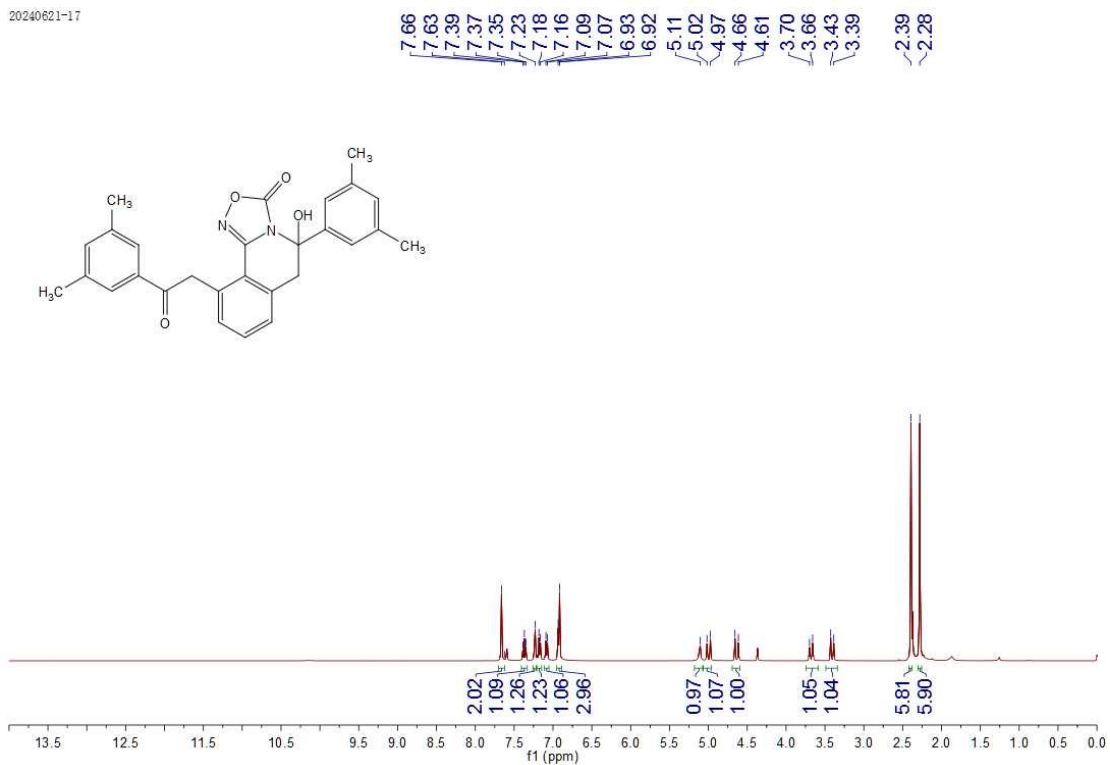<sup>1</sup>H NMR spectrum of **5i** (400 MHz, CDCl<sub>3</sub>)

20240621-17

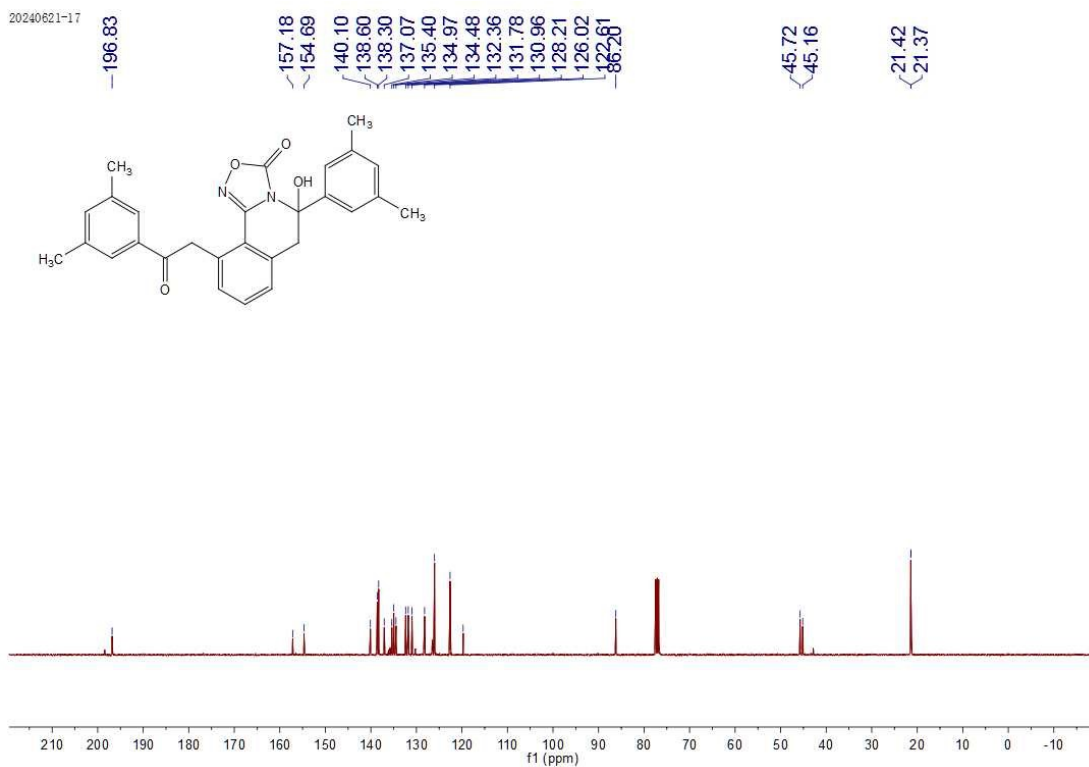<sup>13</sup>C NMR spectrum of **5i** (101 MHz, CDCl<sub>3</sub>)

20240621-15

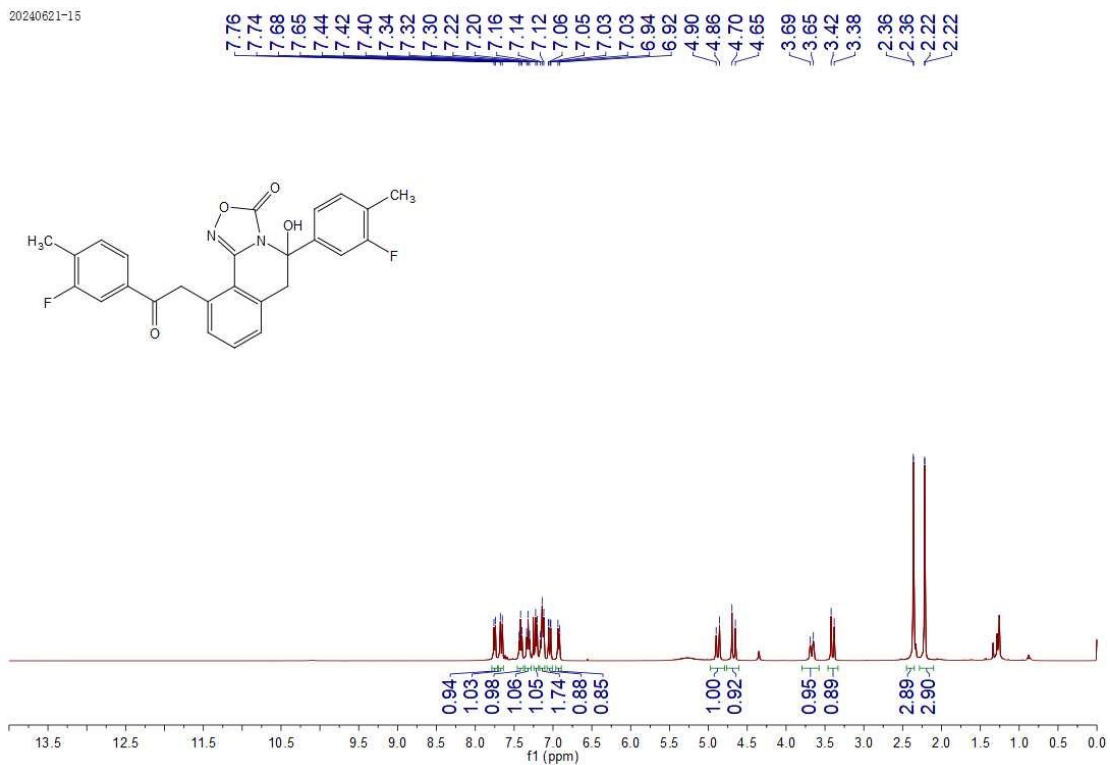<sup>1</sup>H NMR spectrum of **5j** (400 MHz, CDCl<sub>3</sub>)

20240621-15

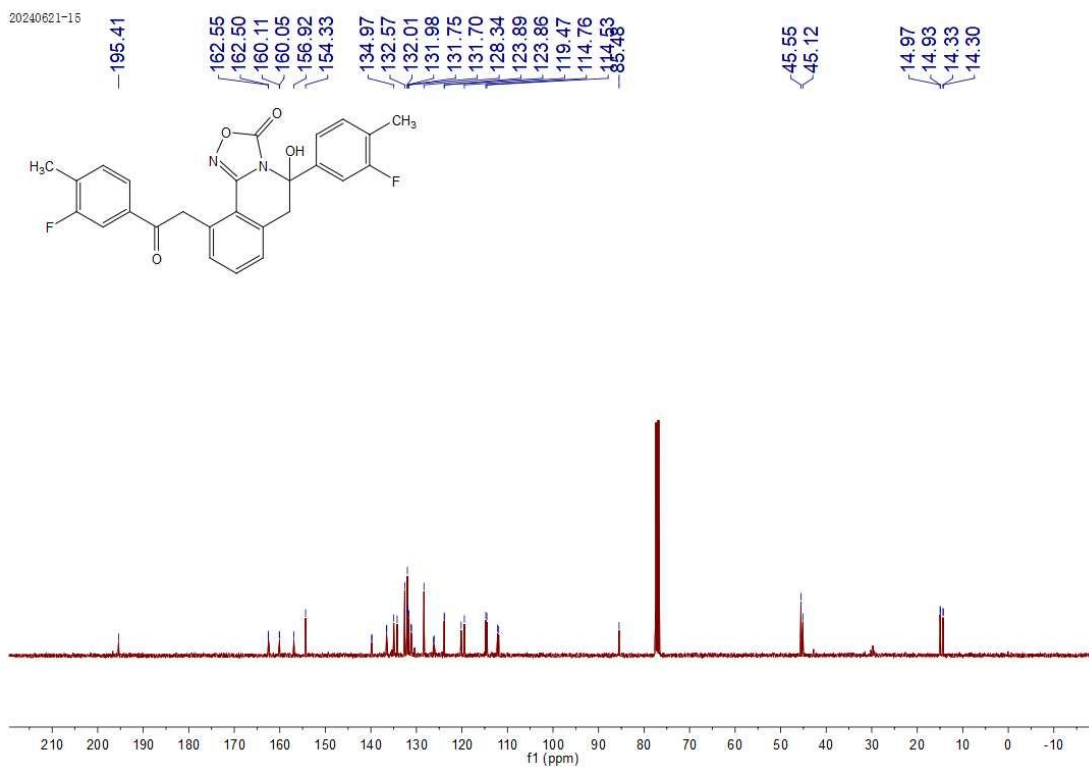<sup>13</sup>C NMR spectrum of **5j** (101 MHz, CDCl<sub>3</sub>)



20240621-15

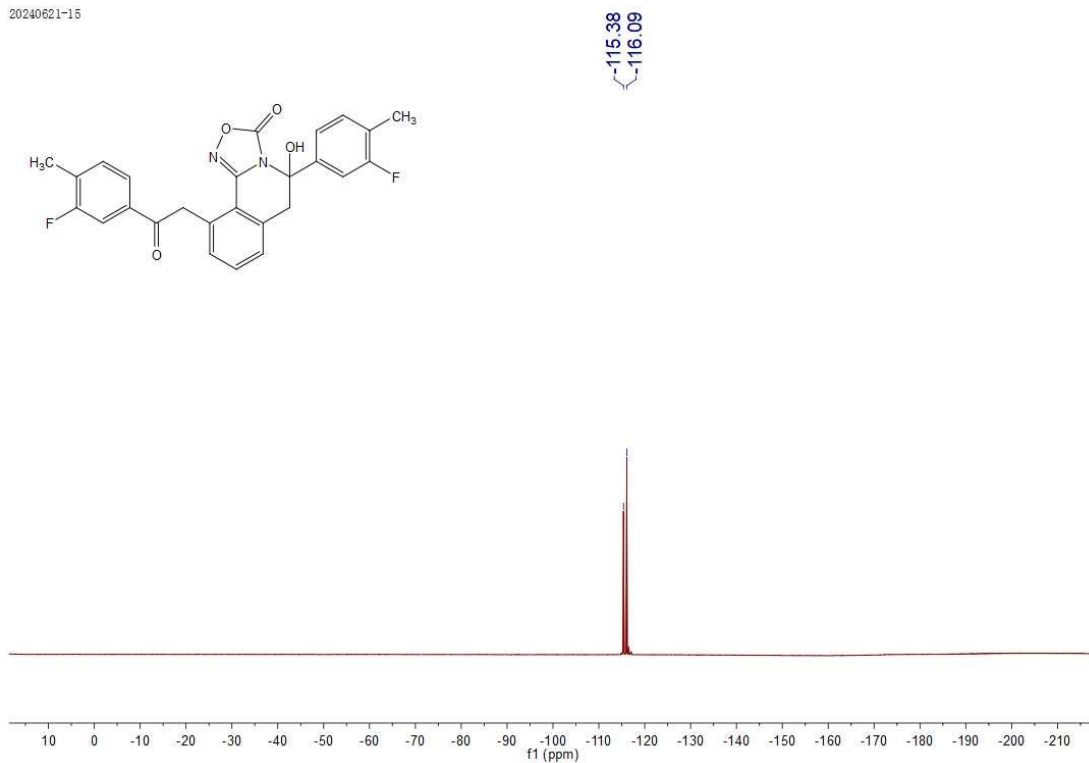

<sup>19</sup>F NMR spectrum of **5j** (376 MHz, CDCl<sub>3</sub>)

20240614-13

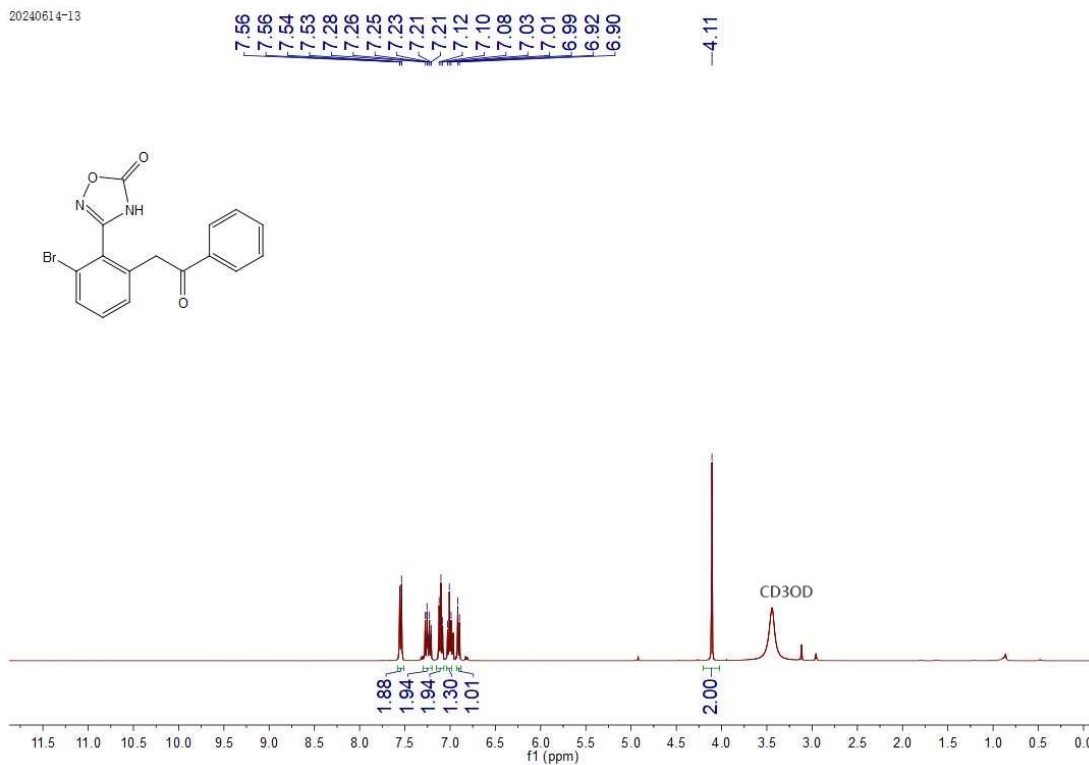

<sup>1</sup>H NMR spectrum of **5k** (400 MHz, CDCl<sub>3</sub>)

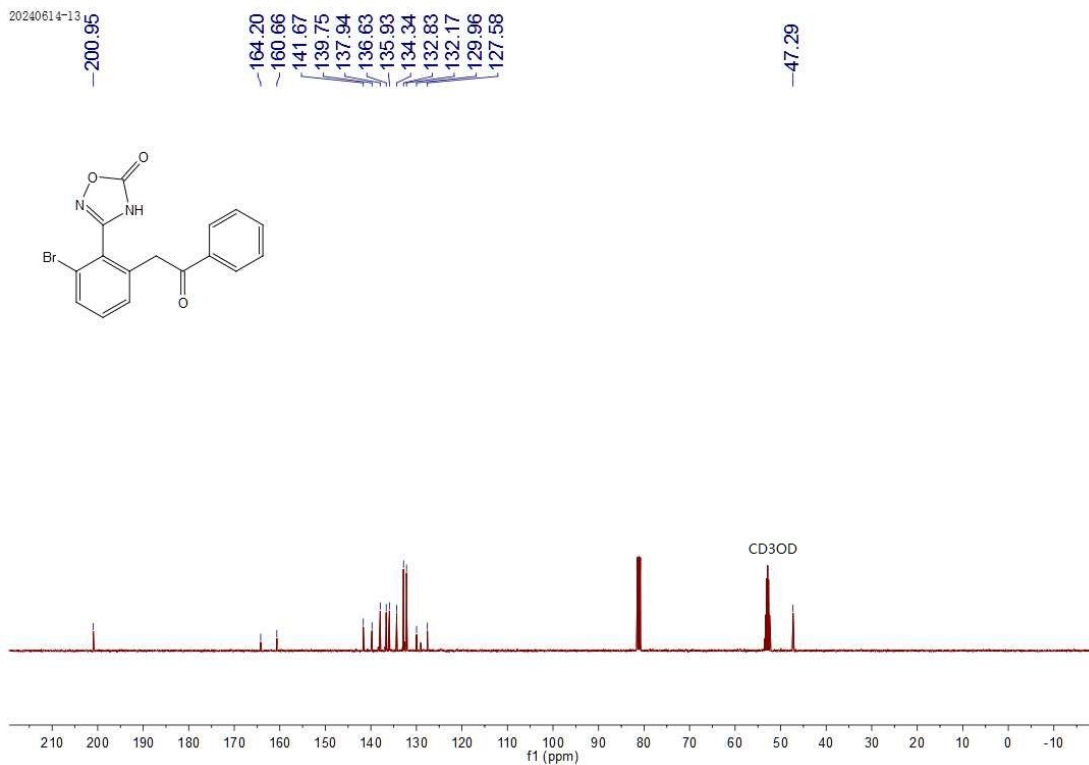

<sup>13</sup>C NMR spectrum of **5k** (101 MHz, CDCl<sub>3</sub>)

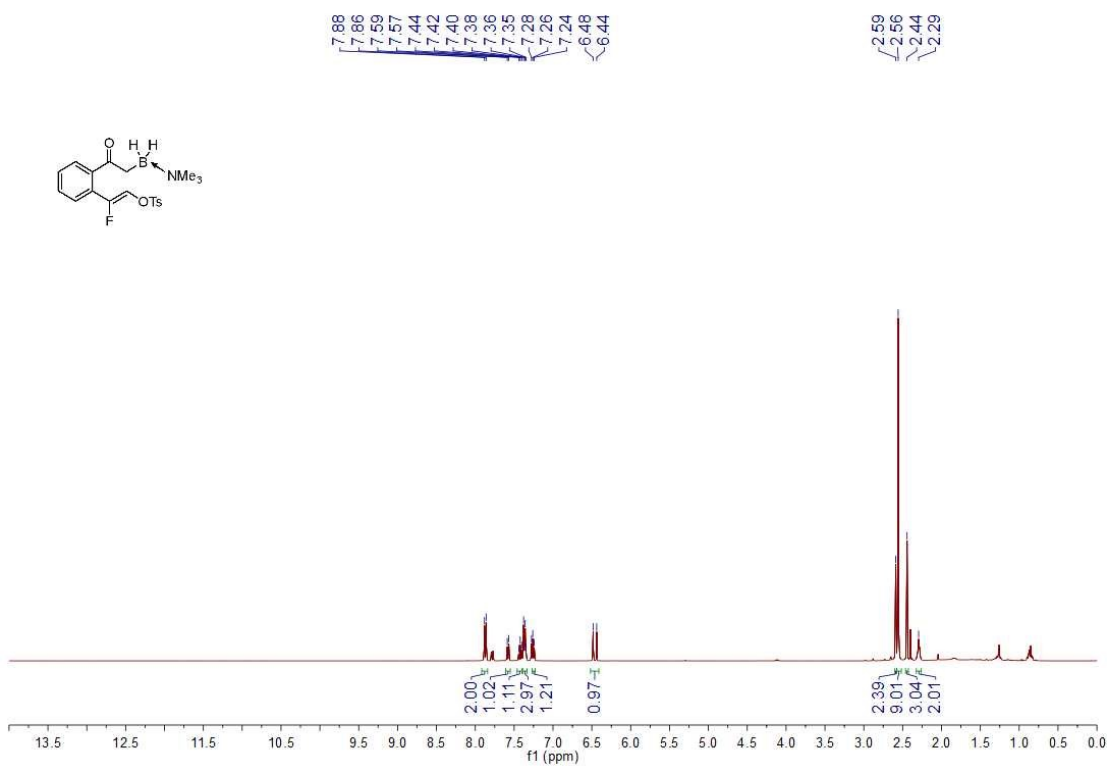

<sup>1</sup>H NMR spectrum of **6** (400 MHz, CDCl<sub>3</sub>)

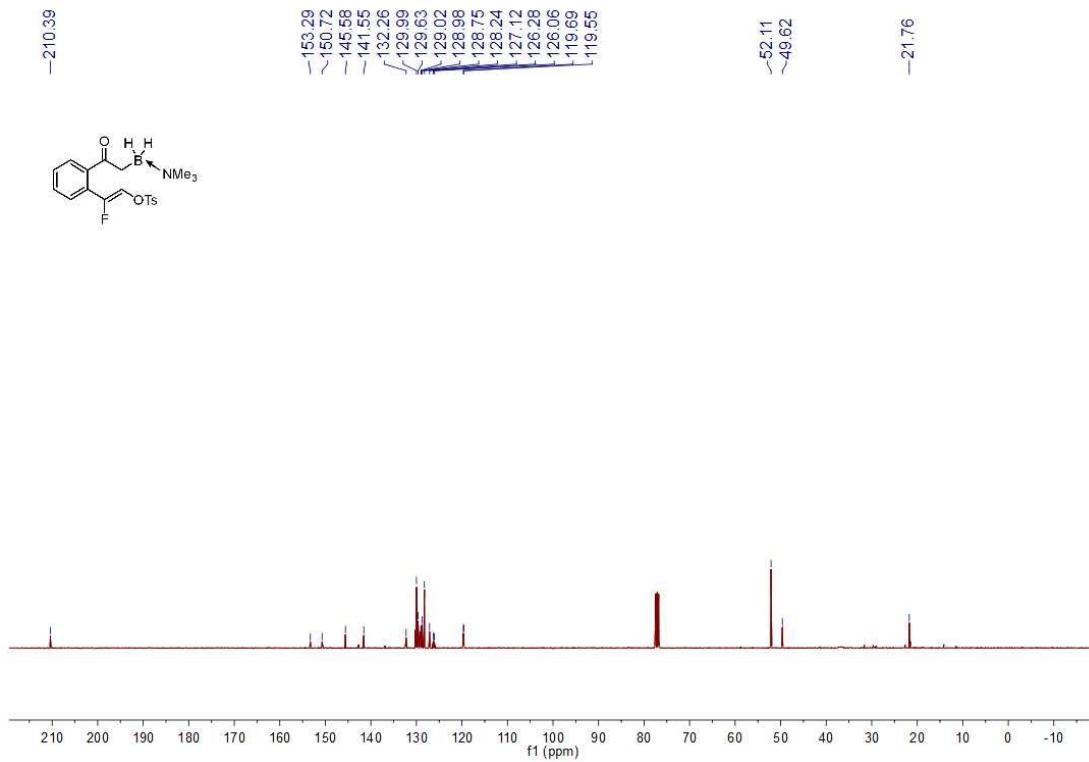

<sup>13</sup>C NMR spectrum of 6 (101 MHz, CDCl<sub>3</sub>)

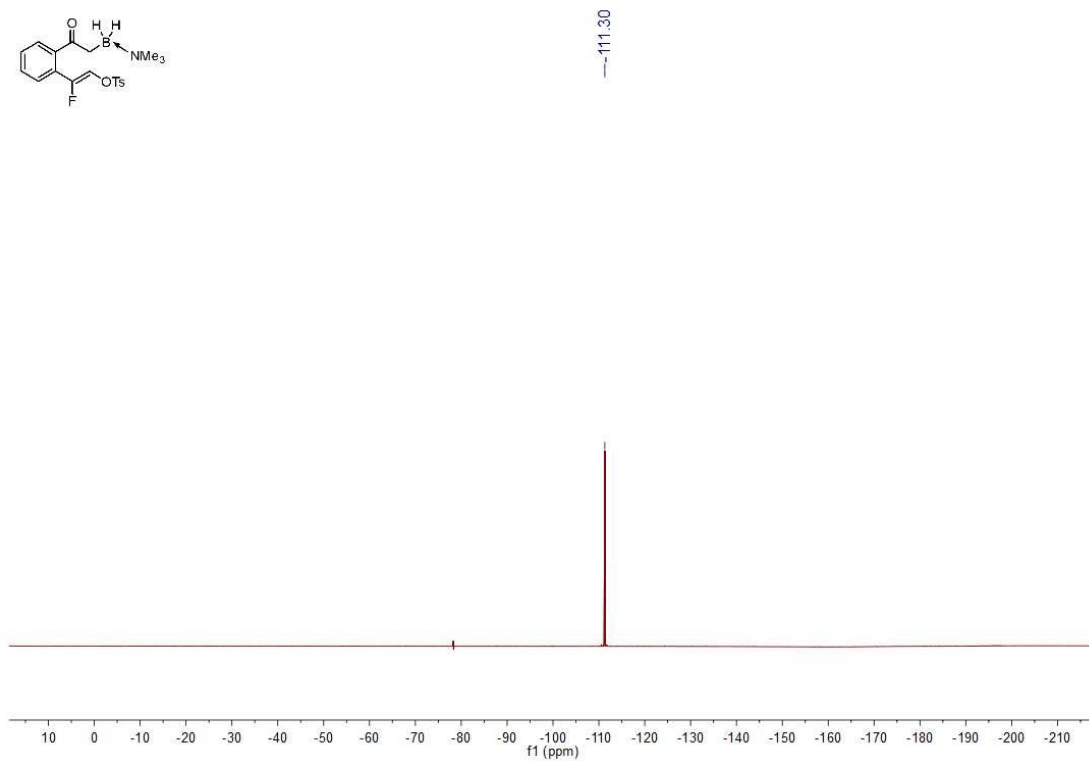

<sup>19</sup>F NMR spectrum of 6 (376 MHz, CDCl<sub>3</sub>)

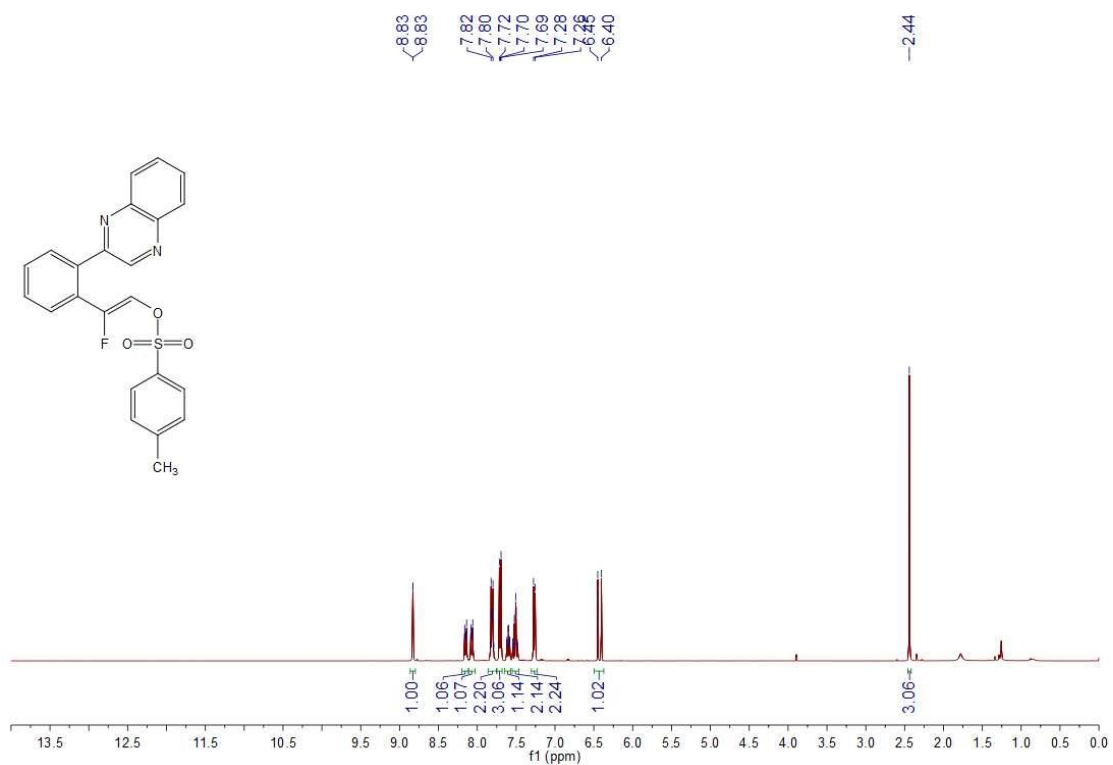

<sup>1</sup>H NMR spectrum of 7 (400 MHz, CDCl<sub>3</sub>)

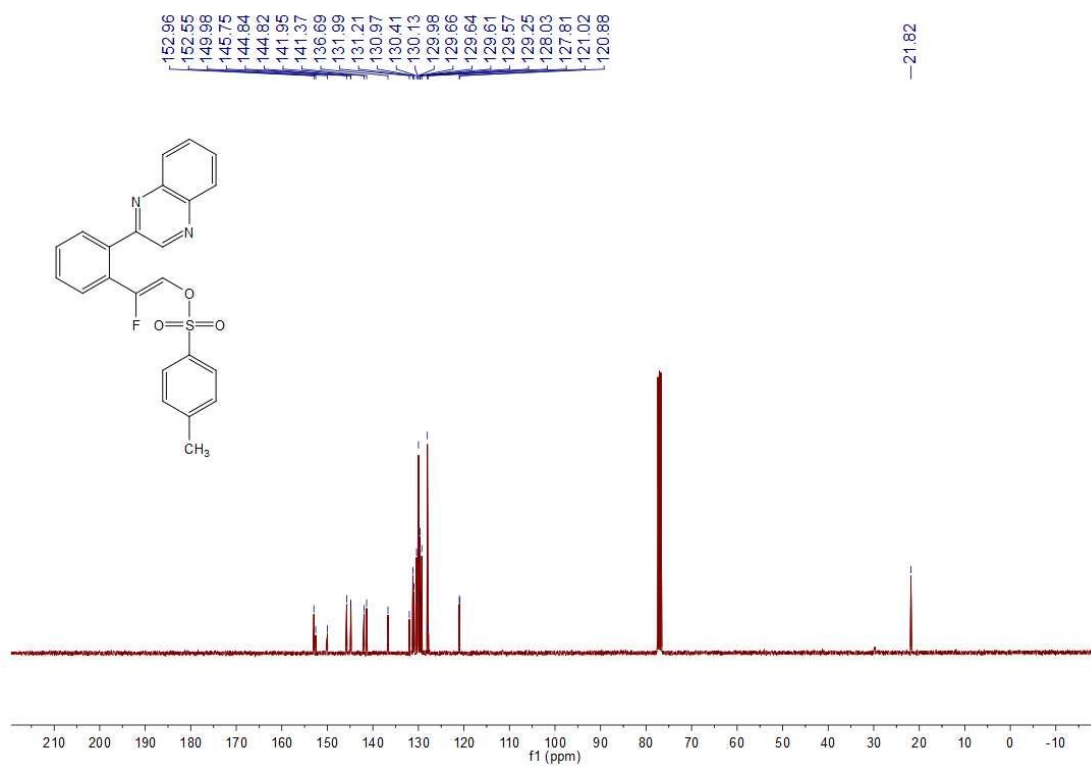

<sup>13</sup>C NMR spectrum of 7 (101 MHz, CDCl<sub>3</sub>)

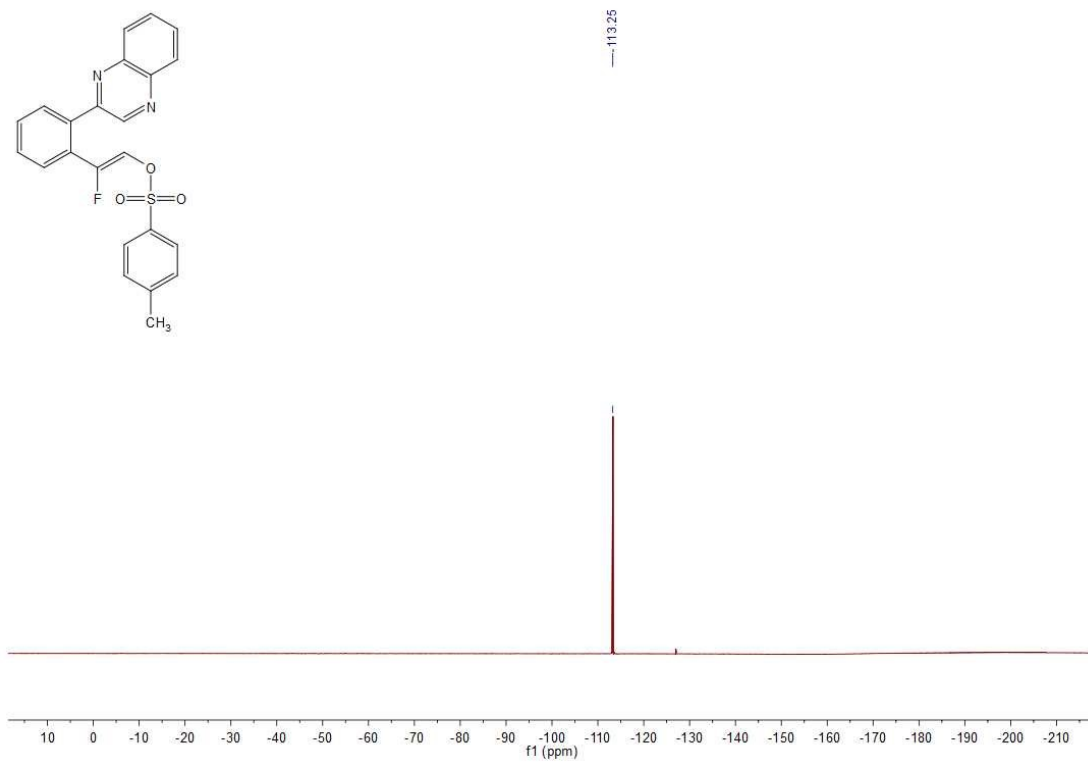

$^{19}\text{F}$  NMR spectrum of 7 (376 MHz,  $\text{CDCl}_3$ )

## 13. References

1. S. S. Zhang, H. Xie, B. Shu, T. Che, X. T. Wang, D. M. Peng, F. Yang and L. Y. Zhang, *Chemical Communications*, 2020, **56**, 423-426.
2. B. Shu, X. T. Wang, Z. X. Shen, T. Che, M. Zhong, J. L. Song, H. J. Kang, H. Xie, L. Y. Zhang and S. S. Zhang, *Organic Chemistry Frontiers*, 2020, **7**, 1802-1808.
3. X. T. Wang, J. L. Song, M. Zhong, H. J. Kang, H. Xie, T. Che, B. Shu, D. M. Peng, L. Y. Zhang and S. S. Zhang, *European Journal of Organic Chemistry*, 2020, **2020**, 3635-3639.
4. Y. C. Zheng, B. Shu, Y. F. Zeng, S. Y. Chen, J. L. Song, Y. Z. Liu, L. Xiao, X. G. Liu, X. X. Zhang and S. S. Zhang, *Organic Chemistry Frontiers*, 2022, **9**, 5185-5190.
5. W. L. Chen, J. L. Song, S. Fang, J. B. Li, S. S. Zhang and B. Shu, *Chem Commun (Camb)*, 2024, **60**, 6560-6563.
6. J. Q. Wu, S. S. Zhang, H. Gao, Z. Qi, C. J. Zhou, W. W. Ji, Y. Liu, Y. Chen, Q. Li, X. Li and H. Wang, *J Am Chem Soc*, 2017, **139**, 3537-3545.
7. X. Yu, K. Chen, Q. Wang, S. Guo, S. Zha and J. Zhu, *Angewandte Chemie-International Edition*, 2017, **56**, 5222-5226.
